# Supplementary material for: Socioeconomic status and non-communicable disease behavioural risk factors in low-income and lower-middle-income countries: a systematic review
Source: PubMed Central journal article supplement (PMC5673683; doi:10.1016/s2214-109x(17)30058-x), 2017-02-11
Supplement: mmc1.pdf [file mmc1.pdf]

# THE LANCET

## Global Health

### Supplementary appendix

This appendix formed part of the original submission and has been peer reviewed. We post it as supplied by the authors.

Supplement to: Allen L, Williams J, Townsend N, et al. Socioeconomic status and non-communicable disease behavioural risk factors in low-income and lower-middle-income countries: a systematic review. *Lancet Glob Health* 2017; **5**: e277–89.

# Appendix

## Tables

|                      |         |
|----------------------|---------|
| High quality studies | Page 2  |
| Alcohol              | Page 38 |
| Physical activity    | Page 49 |
| Diet                 | Page 65 |
| Tobacco              | Page 79 |

## Forms

|                           |          |
|---------------------------|----------|
| Search terms              | Page 110 |
| Screening form            | Page 113 |
| Quality scoring rubric    | Page 114 |
| PRISMA checklist          | Page 115 |
| Data extraction checklist | Page 117 |

| Design, n                                                          | Sample                                                                                                                               | Exposure                         | Outcome                                                                          | n                                  | Exposure subgroup            | Value                     | 95% CI                    | p            |           |       |  |
|--------------------------------------------------------------------|--------------------------------------------------------------------------------------------------------------------------------------|----------------------------------|----------------------------------------------------------------------------------|------------------------------------|------------------------------|---------------------------|---------------------------|--------------|-----------|-------|--|
| <b>Physical activity</b>                                           |                                                                                                                                      |                                  |                                                                                  |                                    |                              |                           |                           |              |           |       |  |
| <b><u>Kinra et al. (2010)</u></b> - Funded by the Wellcome Trust   |                                                                                                                                      |                                  |                                                                                  |                                    |                              |                           |                           |              |           |       |  |
| cross-sectional<br>1,983<br>India                                  | Nationally representative sample of rural inhabitants from 1600 villages in 18 states. Aged 20-69 years                              | <b>SES (men) assets, housing</b> | <b>Low physical activity</b><br><1.69 MET                                        | 147                                | Low (asset score)            | <b>65.2%</b>              | 57.5-72                   | 0.11         |           |       |  |
|                                                                    |                                                                                                                                      |                                  |                                                                                  | 358                                | Middle (asset score)         | <b>72.4%</b>              | 67.8-77.0                 |              |           |       |  |
|                                                                    |                                                                                                                                      |                                  |                                                                                  | 870                                | High (asset score)           | <b>72.9%</b>              | 70.0 -75.9                |              |           |       |  |
|                                                                    |                                                                                                                                      |                                  |                                                                                  | <b>SES (women) assets, housing</b> | <b>Low physical activity</b> | 106                       | Low (asset score)         | <b>66.0%</b> | 54.5-77   | 0.084 |  |
|                                                                    |                                                                                                                                      | adjusted for age                 |                                                                                  |                                    |                              | 143                       | Middle (asset score)      | <b>73.5%</b> | 66.0-81.0 |       |  |
|                                                                    |                                                                                                                                      |                                  |                                                                                  |                                    |                              | 359                       | High (asset score)        | <b>76.5%</b> | 72-81     |       |  |
| <b><u>Gupta et al. (2003)</u></b> - Source of funding not reported |                                                                                                                                      |                                  |                                                                                  |                                    |                              |                           |                           |              |           |       |  |
| cross-sectional<br>573<br>India                                    | Serial cross-sectional surveys from the general population of Jaipur. Data taken from the most recent round.<br><br>Age not reported | <b>Education (men)</b>           | <b>Physical Inactivity</b><br>Leisure time physical activity <30 minutes 3x week | 103                                |                              | Low (no formal education) | <b>89.3%</b>              |              | 0.016     |       |  |
|                                                                    |                                                                                                                                      |                                  |                                                                                  | 182                                |                              | Middle-low (1-10 years)   | <b>64.3%</b>              |              |           |       |  |
|                                                                    |                                                                                                                                      |                                  |                                                                                  | 202                                | Middle-high (11-15 years)    | <b>50.5%</b>              |                           |              |           |       |  |
|                                                                    |                                                                                                                                      |                                  |                                                                                  | 63                                 | High (>16 years)             | <b>42.9%</b>              |                           |              |           |       |  |
|                                                                    |                                                                                                                                      |                                  |                                                                                  | <b>Education (women)</b>           | <b>Physical Inactivity</b>   | 213                       | Low (no formal education) | <b>89.2%</b> |           | 0.038 |  |
|                                                                    |                                                                                                                                      | adjusted for age                 |                                                                                  |                                    |                              | 163                       | Middle-low (1-10 years)   | <b>58.9%</b> |           |       |  |
|                                                                    |                                                                                                                                      |                                  |                                                                                  |                                    |                              | 161                       | Middle-high (11-15 years) | <b>39.8%</b> |           |       |  |
|                                                                    |                                                                                                                                      |                                  |                                                                                  |                                    |                              | 36                        | High (>16 years)          | <b>33.3%</b> |           |       |  |

**Singh et al. (1997)** - Source of funding not reported

## All High Quality Studies

|                                   |                                                                         |                                                                 |                                                                                                              |                            |                     |               |       |
|-----------------------------------|-------------------------------------------------------------------------|-----------------------------------------------------------------|--------------------------------------------------------------------------------------------------------------|----------------------------|---------------------|---------------|-------|
| cross-sectional<br>1,767<br>India | Residents of two villages in rural north India.<br><br>Aged 25-64 years | <b>SES (men) education, occupation, income, assets, housing</b> | <b>Sedentary lifestyle</b><br>walk <14.5km/week, climb <20flights stairs or no moderate activity 5 days/week | 147 High                   | <b>44.20%</b>       | <0.05         |       |
|                                   |                                                                         |                                                                 |                                                                                                              | 147 Middle-high            | <b>34.60%</b>       |               |       |
|                                   |                                                                         |                                                                 |                                                                                                              | 287 Middle-low             | <b>3.50%</b>        |               |       |
|                                   |                                                                         |                                                                 |                                                                                                              | 313 Low                    | <b>not reported</b> |               |       |
|                                   | no adjustment described                                                 |                                                                 | <b>SES (women) education, occupation, income, assets, housing</b>                                            | <b>Sedentary lifestyle</b> | 115 High            | <b>13%</b>    | <0.01 |
|                                   |                                                                         |                                                                 |                                                                                                              |                            | 112 Middle-high     | <b>58%</b>    |       |
|                                   |                                                                         |                                                                 |                                                                                                              |                            | 313 Middle-low      | <b>20.40%</b> |       |
|                                   |                                                                         |                                                                 |                                                                                                              |                            | 335 Low             | <b>4.40%</b>  |       |

**Gupta et al. (2012)** - Funded by the South Asian Society of Atherosclerosis and Thrombosis

|                                  |                                                                                                                                                 |                                                                          |                                                                                           |                                    |              |                          |
|----------------------------------|-------------------------------------------------------------------------------------------------------------------------------------------------|--------------------------------------------------------------------------|-------------------------------------------------------------------------------------------|------------------------------------|--------------|--------------------------|
| cross-section:<br>6,198<br>India | General population in middle-class areas of 11 cities, excluded house-bound, pregnant and those likely to die within 6 months. Aged 18-75 years | <b>Education</b>                                                         | <b>Low physical activity</b><br>no regular work-related or leisure time physical activity | 1,248 Low (0-10 years)             | <b>37.2%</b> | adjusted for age and sex |
|                                  |                                                                                                                                                 |                                                                          |                                                                                           | 2,956 Middle (11-15 years)         | <b>45.5%</b> |                          |
|                                  |                                                                                                                                                 |                                                                          |                                                                                           | 1,366 High (>15 years)             | <b>35.5%</b> |                          |
|                                  |                                                                                                                                                 | <b>Occupational Class (British Social Register, housewife = husband)</b> | <b>Low physical activity</b>                                                              | 1,287 Low (4-5)                    | <b>47.4%</b> |                          |
|                                  |                                                                                                                                                 |                                                                          |                                                                                           | 1,677 Middle (3 manual/non-manual) | <b>43.7%</b> |                          |
|                                  |                                                                                                                                                 |                                                                          |                                                                                           | 3,018 High (1-2 )                  | <b>39.1%</b> |                          |
|                                  |                                                                                                                                                 | <b>SES (self-assessed)</b>                                               | <b>Low physical activity</b>                                                              | 374 Low (score 1-3)                | <b>42.3%</b> |                          |
|                                  |                                                                                                                                                 |                                                                          |                                                                                           | 3,622 Middle (score 4-6)           | <b>40.1%</b> |                          |
|                                  |                                                                                                                                                 |                                                                          |                                                                                           | 1,114 High ( score 7-10)           | <b>36.9%</b> |                          |

**Reddy et al. (2007)** - Funded by the Indian Ministry of Health; WHO

|                           |                                                                                                |                        |                                                            |                                        |                    |        |
|---------------------------|------------------------------------------------------------------------------------------------|------------------------|------------------------------------------------------------|----------------------------------------|--------------------|--------|
| cross-sectional<br>19,969 | Industrial workers and their relatives from ten urban sites across India.<br>Aged 20-69 years. | <b>Education (men)</b> | <b>Physical activity</b><br>leisure time physical activity | 1,611 High (postgraduate)              | <b>1</b> OR        | <0.001 |
|                           |                                                                                                |                        |                                                            | 2,607 Middle-high (secondary-tertiary) | <b>0.9</b> 0.8-1.1 |        |

|                                 |                          |                          |       |                                  |            |           |        |
|---------------------------------|--------------------------|--------------------------|-------|----------------------------------|------------|-----------|--------|
|                                 |                          |                          | 5,820 | Middle-low (primary-secondary)   | <b>0.7</b> | 0.6-0.8   |        |
|                                 |                          |                          | 1,859 | Low (none-primary)               | <b>0.2</b> | 0.18-0.25 |        |
|                                 | <b>Education (women)</b> | <b>Physical activity</b> | 1,611 | High (postgraduate)              | <b>1</b>   | OR        | <0.001 |
|                                 |                          |                          | 2,607 | Middle-high (secondary-tertiary) | <b>0.9</b> | 0.7-1.1   |        |
|                                 |                          |                          | 5,820 | Middle-low (primary-secondary)   | <b>0.6</b> | 0.5-0.8   |        |
| adjusted for age and occupation |                          |                          | 1,859 | Low (none-primary)               | <b>0.3</b> | 0.2-0.4   |        |

**Dhungana et al. (2014)** - Source of funding not reported

|                         |                                           |                                            |  |                                              |                                 |              |        |
|-------------------------|-------------------------------------------|--------------------------------------------|--|----------------------------------------------|---------------------------------|--------------|--------|
| cross-sectional         | Rural community in the Sindhuli district. |                                            |  |                                              |                                 |              |        |
| 406                     |                                           | <b>Caste</b>                               |  | <b>Insufficient physical activity</b>        |                                 |              |        |
| Nepal                   | Aged 20-50 years                          |                                            |  | <150 minutes moderate physical activity/week | High (Brahman/Chhetri)          | <b>47.5%</b> | 0.06   |
|                         |                                           |                                            |  |                                              | Middle (Adhibasi/Janajati)      | <b>51.6%</b> |        |
|                         |                                           |                                            |  |                                              | Low (Dalits)                    | <b>28.6%</b> |        |
|                         |                                           | <b>Education</b>                           |  | <b>Insufficient physical activity</b>        | Low (No formal education)       | <b>45.7%</b> | 0.0286 |
|                         |                                           |                                            |  |                                              | Middle-low (lower than primary) | <b>37.9%</b> |        |
|                         |                                           |                                            |  |                                              | Middle-high (primary)           | <b>50.0%</b> |        |
|                         |                                           |                                            |  |                                              | High (Secondary and higher)     | <b>61.4%</b> |        |
|                         |                                           | <b>SES (education, occupation, income)</b> |  | <b>Insufficient physical activity</b>        | Lowest                          | <b>54.1%</b> | 0.8    |
|                         |                                           |                                            |  |                                              | Middle-low                      | <b>42.6%</b> |        |
|                         |                                           |                                            |  |                                              | Middle-high                     | <b>50.0%</b> |        |
| no adjustment described |                                           |                                            |  |                                              | Highest                         | <b>62.5%</b> |        |

**Zeba et al. (2014)** - Funded by the Canadian International Development Agency

|                 |                                                                                          |                    |  |                                                      |                        |             |                 |
|-----------------|------------------------------------------------------------------------------------------|--------------------|--|------------------------------------------------------|------------------------|-------------|-----------------|
| cross-sectional | Burkinabe born and resident in Ouagadougou                                               |                    |  |                                                      |                        |             |                 |
| 330             |                                                                                          | <b>Asset score</b> |  | <b>Physical activity</b>                             |                        |             |                 |
| Burkina Faso    | for >6 months. Excludes pregnant or lactating women and physically and mentally disabled |                    |  | mean hours of physical activity equivalent to >3 MET | Low (tertile score)    | <b>5.3h</b> | (SD) 2.7 <0.001 |
|                 |                                                                                          |                    |  |                                                      | Medium (tertile score) | <b>4.3h</b> | (SD) 2.2        |
|                 |                                                                                          |                    |  |                                                      | High (tertile score)   | <b>3.4h</b> | (SD) 1.6        |

## All High Quality Studies

|                         |                    |                                                                                  |                              |              |          |        |
|-------------------------|--------------------|----------------------------------------------------------------------------------|------------------------------|--------------|----------|--------|
| individuals.            |                    |                                                                                  |                              |              |          |        |
| Aged 25-60 years        | <b>Asset score</b> | <b>Sedentary time</b><br>mean hours of sedentary time equivalent to <3 MET hours | Low (tertile score)          | <b>10.7h</b> | (SD) 3.1 | <0.001 |
|                         |                    |                                                                                  | Medium (tertile score)       | <b>11.4h</b> | (SD) 3.1 |        |
|                         |                    |                                                                                  | High (tertile score)         | <b>12.4h</b> | (SD) 2.8 |        |
|                         | <b>Education</b>   | <b>Physical activity</b>                                                         | Low (no formal)              | <b>4.8h</b>  | (SD) 2.4 | 0.002  |
|                         |                    |                                                                                  | Medium (elementary)          | <b>4.6h</b>  | (SD) 2.5 |        |
|                         |                    |                                                                                  | High (High school and above) | <b>3.8h</b>  | (SD) 2.1 |        |
|                         | <b>Education</b>   | <b>Sedentary time</b>                                                            | Low (no formal)              | <b>11.1h</b> | (SD) 3.2 | 0.251  |
|                         |                    |                                                                                  | Medium (elementary)          | <b>11.6h</b> | (SD) 3.1 |        |
| no adjustment described |                    |                                                                                  | High (High school and above) | <b>11.7h</b> | (SD) 3.0 |        |

**Qanh et al. (2008)** - Funded by Atlantic Philanthropies

|                                     |                        |                                                             |                         |             |                        |       |
|-------------------------------------|------------------------|-------------------------------------------------------------|-------------------------|-------------|------------------------|-------|
| cross-section: Representative STEPS | <b>Education</b>       | <b>Insufficient physical activity</b><br><600 MET mins/week | less than primary       | <b>1</b>    | OR, p for trend <0.001 |       |
| 1,776 survey from Ho Chi Minh       |                        |                                                             | primary completed       | <b>0.88</b> | 0.56-1.37              |       |
| Vietnam city.                       |                        |                                                             | secondary completed     | <b>0.93</b> | 0.55-1.56              |       |
| Aged 25-64 years                    |                        |                                                             | high school completed   | <b>1.09</b> | 0.68-1.75              |       |
|                                     |                        |                                                             | some college            | <b>1.32</b> | 0.63-2.76              |       |
|                                     | <b>Income</b>          | <b>Insufficient physical activity</b>                       | VND <1,000,000/month    | <b>1</b>    | OR, p for trend <0.001 |       |
|                                     |                        |                                                             | VND 1,000,000-3,000,000 | <b>1.42</b> | 1.02-2.0               | <0.05 |
|                                     |                        |                                                             | VND 3,000,000-5,000,000 | <b>1.51</b> | 0.94-2.43              |       |
|                                     |                        |                                                             | VND >5,000,000          | <b>1.77</b> | 1.05-2.9               | <0.05 |
|                                     | <b>Wealth (assets)</b> | <b>Insufficient physical activity</b>                       | Lowest                  | <b>1</b>    | OR, p for trend <0.001 |       |
|                                     |                        |                                                             | Second                  | <b>1.29</b> | 0.9-1.84               |       |
|                                     |                        |                                                             | Middle                  | <b>1.67</b> | 1.26-2.21              | <0.05 |
|                                     |                        |                                                             | Fourth                  | <b>1.87</b> | 1.15-3.04              | <0.05 |
|                                     |                        |                                                             | Highest                 | <b>1.86</b> | 1.29-2.61              | <0.05 |

no adjustment described

*variables; age group, sex, ethnicity, education, occupation, household SES, tobacco use, alcohol consumption*

## Alcohol

**Bonu et al. (2005)** - Source of funding not reported

|                                    |                                                                                       |                                    |                                                                       |                              |                                        |       |
|------------------------------------|---------------------------------------------------------------------------------------|------------------------------------|-----------------------------------------------------------------------|------------------------------|----------------------------------------|-------|
| cross-sectional<br>22,685<br>India | Hospitalised participants of the 1995/6 Indian National Sample Survey. Aged >10 years | <b>Current regular alcohol use</b> | <b>Poverty</b><br>borrowing/financial distress during hospitalisation | Non-user<br><br>Alcohol user | <b>1</b> OR<br><br><b>1.1</b> 0.64-1.1 | >0.05 |
|------------------------------------|---------------------------------------------------------------------------------------|------------------------------------|-----------------------------------------------------------------------|------------------------------|----------------------------------------|-------|

adjusted for: head of household, age, sex, level of schooling, marital status, state. number of days of hospitalisation used to control for severity of illness.

**Gupta et al. (2012)** - Funded by the South Asian Society of Atherosclerosis and Thrombosis

|                                   |                                                                                                                                                 |                                                                             |                      |                                                                                |                                              |
|-----------------------------------|-------------------------------------------------------------------------------------------------------------------------------------------------|-----------------------------------------------------------------------------|----------------------|--------------------------------------------------------------------------------|----------------------------------------------|
| cross-sectional<br>6,198<br>India | General population in middle-class areas of 11 cities, excluded house-bound, pregnant and those likely to die within 6 months. Aged 18-75 years | <b>Education</b>                                                            | <b>Alcohol abuse</b> | 1,248 Low (0-10 years)<br>2,956 Middle (11-15 years)<br>1,366 High (>15 years) | <b>9.6%</b><br><b>10.3%</b><br><b>11.5%</b>  |
|                                   |                                                                                                                                                 | <b>Occupational Class</b><br>(British Social Register, housewife = husband) | <b>Alcohol abuse</b> | 1,287 Low (4-5)<br>1,677 Middle (3 manual/non-manual)<br>3,018 High (1-2)      | <b>5.1%</b><br><b>13.3%</b><br><b>10.8%</b>  |
|                                   |                                                                                                                                                 | <b>SES (self-assessed)</b>                                                  | <b>Alcohol abuse</b> | 374 Low (score 1-3)<br>3,622 Middle (score 4-6)<br>1,114 High (score 7-10)     | <b>11.2%</b><br><b>11.6%</b><br><b>11.4%</b> |

adjusted for; age and sex

**Samuel et al. (2012)** - Funded by the British Heart Foundation

|                                   |                                                                                                              |                             |                    |                                             |                                   |
|-----------------------------------|--------------------------------------------------------------------------------------------------------------|-----------------------------|--------------------|---------------------------------------------|-----------------------------------|
| cross-sectional<br>2,218<br>India | Young adults from population-based birth cohort in rural and urban areas of southern India. Aged 26-32 years | <b>Wealth (asset score)</b> | <b>Alcohol use</b> | Low (quintile 1)<br>Middle-low (quintile 2) | <b>1</b> OR<br><b>0.8</b> 0.6-1.3 |
|-----------------------------------|--------------------------------------------------------------------------------------------------------------|-----------------------------|--------------------|---------------------------------------------|-----------------------------------|

## All High Quality Studies

|                                                                                                                    |                  |                    |                                |            |         |  |
|--------------------------------------------------------------------------------------------------------------------|------------------|--------------------|--------------------------------|------------|---------|--|
|                                                                                                                    |                  |                    | Middle (quintile 3)            | <b>0.8</b> | 0.6-1.3 |  |
|                                                                                                                    |                  |                    | Middle-high (quintile 4)       | <b>1</b>   | 0.7-1.5 |  |
|                                                                                                                    |                  |                    | High (Quintile 5)              | <b>0.8</b> | 0.5-1.3 |  |
|                                                                                                                    | <b>Education</b> | <b>Alcohol use</b> | Low (0 years formal schooling) | <b>1</b>   | OR      |  |
|                                                                                                                    |                  |                    | Middle-low (1-8 years)         | <b>1.3</b> | 0.7-2.3 |  |
|                                                                                                                    |                  |                    | Middle-high (9-12)             | <b>1.1</b> | 0.6-1.9 |  |
|                                                                                                                    |                  |                    | High (>12 years)               | <b>0.6</b> | 0.3-1.2 |  |
| adjusted for; gender, place of residence, possessions score, adult educational status, paternal educational status |                  |                    |                                |            |         |  |

**Kinra et al. (2010)** - Funded by the Wellcome Trust

|                                                                                                           |                                                                                              |                                    |                                                          |              |           |        |
|-----------------------------------------------------------------------------------------------------------|----------------------------------------------------------------------------------------------|------------------------------------|----------------------------------------------------------|--------------|-----------|--------|
| cross-sectional<br>1,983                                                                                  | Nationally representative sample<br>of rural inhabitants from 1600<br>villages in 18 states. |                                    |                                                          |              |           |        |
| India                                                                                                     | Aged 20-69 years                                                                             | <b>SES (men) assets, housing</b>   | <b>Alcohol use</b>                                       |              |           |        |
|                                                                                                           |                                                                                              |                                    | consumed >10 days/month any time in previous<br>6 months |              |           |        |
|                                                                                                           |                                                                                              |                                    | 147 Low (asset score)                                    | <b>33.7%</b> | 26.2-41   | <0.001 |
|                                                                                                           |                                                                                              |                                    | 358 Middle (asset score)                                 | <b>26.9%</b> | 22.3-31.5 |        |
|                                                                                                           |                                                                                              |                                    | 870 High (asset score)                                   | <b>20.2%</b> | 17.5-22.9 |        |
|                                                                                                           |                                                                                              | <b>SES (women) assets, housing</b> | <b>Alcohol use</b>                                       |              |           |        |
|                                                                                                           |                                                                                              |                                    | 106 Low (asset score)                                    | <b>11.2%</b> | 5.6-16.1  | <0.001 |
|                                                                                                           |                                                                                              |                                    | 143 Middle (asset score)                                 | <b>8.1%</b>  | 3.4-12.9  |        |
|                                                                                                           |                                                                                              |                                    | 359 High (asset score)                                   | <b>2.5%</b>  | 1.0-4.1   |        |
| adjusted for; gender, place of residence, possessions score, adult educational status, paternal education |                                                                                              |                                    |                                                          |              |           |        |

**Subramanian et al. (2005)** - Source of funding not reported

|                            |                                                                                                                 |                        |                                       |             |           |  |
|----------------------------|-----------------------------------------------------------------------------------------------------------------|------------------------|---------------------------------------|-------------|-----------|--|
| cross-sectional<br>301,984 | Data from the nationally<br>representative 1998/9<br>Indian National Family<br>Health Survey.<br>Aged >18 years | <b>Caste (men)</b>     | <b>Drink alcohol</b>                  |             |           |  |
| India                      |                                                                                                                 |                        | household member drinks alcohol       |             |           |  |
|                            |                                                                                                                 |                        | 60,001 Other (High)                   | <b>1</b>    | OR        |  |
|                            |                                                                                                                 |                        | 41,984 Other backward class (Medium)  | <b>1.08</b> | 1.04-1.12 |  |
|                            |                                                                                                                 |                        | 24,503 Scheduled caste (Low)          | <b>1.43</b> | 1.37-1.49 |  |
|                            |                                                                                                                 |                        | 18,362 Scheduled tribe (Low)          | <b>2.04</b> | 1.92-2.17 |  |
|                            |                                                                                                                 | <b>Education (men)</b> | <b>Drink alcohol</b>                  |             |           |  |
|                            |                                                                                                                 |                        | 4,328 Highest (postgraduate)          | <b>1</b>    | OR        |  |
|                            |                                                                                                                 |                        | 13,004 High (college)                 | <b>1.11</b> | 1.01-1.22 |  |
|                            |                                                                                                                 |                        | 14,170 Medium-high (higher secondary) | <b>1.21</b> | 1.1-1.33  |  |
|                            |                                                                                                                 |                        | 54,516 Medium-low (secondary)         | <b>1.75</b> | 1.61-1.91 |  |



## All High Quality Studies

|  |                              |                      |        |                                |             |           |
|--|------------------------------|----------------------|--------|--------------------------------|-------------|-----------|
|  |                              |                      | 27,504 | Low (primary)                  | <b>2.13</b> | 1.95-2.33 |
|  |                              |                      | 38,523 | Lowest (Illiterate)            | <b>2.28</b> | 2.08-2.5  |
|  | <b>Wealth (men) assets</b>   | <b>Drink alcohol</b> | 34,133 | Highest                        | <b>1</b>    | OR        |
|  |                              |                      | 31,611 | High                           | <b>1.12</b> | 1.07-1.18 |
|  |                              |                      | 30,413 | Medium                         | <b>1.30</b> | 1.24-1.37 |
|  |                              |                      | 28,985 | Low                            | <b>1.59</b> | 1.51-1.68 |
|  |                              |                      | 26,903 | Lowest                         | <b>1.92</b> | 1.81-2.03 |
|  | <b>Caste (women)</b>         | <b>Drink alcohol</b> | 58,977 | Other (High)                   | <b>1</b>    | OR        |
|  |                              |                      | 41,614 | Other backward class (Medium)  | <b>1.55</b> | 1.31-1.83 |
|  |                              |                      | 23,847 | Scheduled caste (Low)          | <b>1.66</b> | 1.47-1.87 |
|  |                              |                      | 18,373 | Scheduled tribe (Low)          | <b>3.74</b> | 2.79-5    |
|  | <b>Education (women)</b>     | <b>Drink alcohol</b> | 2,154  | Highest (postgraduate)         | <b>1</b>    | OR        |
|  |                              |                      | 6,948  | High (college)                 | <b>0.85</b> | 0.72-1    |
|  |                              |                      | 7,571  | Medium-high (higher secondary) | <b>0.55</b> | 0.41-0.75 |
|  |                              |                      | 33,133 | Medium-low (secondary)         | <b>0.81</b> | 0.62-1.05 |
|  |                              |                      | 22,952 | Low (primary)                  | <b>1.00</b> | 0.74-1.35 |
|  |                              |                      | 77,181 | Lowest (Illiterate)            | <b>1.31</b> | 1-1.71    |
|  | <b>Wealth (women) assets</b> | <b>Drink alcohol</b> | 34,049 | Highest                        | <b>1</b>    | OR        |
|  |                              |                      | 30,798 | High                           | <b>1.17</b> | 0.94-1.45 |
|  |                              |                      | 29,156 | Medium                         | <b>1.60</b> | 1.23-2.09 |
|  |                              |                      | 27,836 | Low                            | <b>1.96</b> | 1.53-2.43 |
|  |                              |                      | 28,100 | Lowest                         | <b>2.72</b> | 2.18-3.39 |

adjusted for; living environment, marital status, age, religion, caste, education, household standard of living index

**Hashibe et al. (2003)** - Funded by Assoc. Int Cancer Research; Imperial Cancer Research Fund; National Cancer Institute (USA) & UCLA Jonnson Cancer Centre Foundation

|              |                                                      |               |                 |                             |              |
|--------------|------------------------------------------------------|---------------|-----------------|-----------------------------|--------------|
| case-control | Study examining SES and premalignant oral lesions in | <b>Income</b> | <b>Drinking</b> | Low (INR<1500)              | <b>16.8%</b> |
| 47,773       |                                                      |               |                 | Middle-low (INR 1500-3000)  | <b>12.4%</b> |
| India        | Kerala. Data is presented                            |               |                 | Middle-high (INR 3001-5000) | <b>11.2%</b> |

## All High Quality Studies

|                                                                                           |                   |                 |                 |              |         |
|-------------------------------------------------------------------------------------------|-------------------|-----------------|-----------------|--------------|---------|
| linking NCD risk factors with SES markers for the 47,773 controls only.<br>Aged >35 years | <b>Education</b>  | <b>Drinking</b> | High (INR>5000) | <b>9.3%</b>  | <0.0001 |
|                                                                                           |                   |                 | None/illiterate | <b>11.6%</b> |         |
|                                                                                           |                   |                 | None/literate   | <b>8.3%</b>  |         |
|                                                                                           |                   |                 | Primary         | <b>15.4%</b> |         |
|                                                                                           |                   |                 | Middle          | <b>17.2%</b> |         |
|                                                                                           | <b>Occupation</b> | <b>Drinking</b> | >High school    | <b>15.4%</b> | <0.0001 |
|                                                                                           |                   |                 | Manual          | <b>12.5%</b> |         |
|                                                                                           |                   |                 | Teacher/office  | <b>18.7%</b> |         |
|                                                                                           |                   |                 | Business        | <b>30.0%</b> |         |
|                                                                                           |                   |                 | Retired         | <b>24.7%</b> |         |
| Other                                                                                     | <b>34.3%</b>      | <0.0001         |                 |              |         |
| no adjustment described                                                                   |                   |                 |                 |              |         |

**Neufeld et al. (2005)** - No external funding

|                                     |                  |                |                                       |            |               |
|-------------------------------------|------------------|----------------|---------------------------------------|------------|---------------|
| cross-sectional<br>471,143<br>India | <b>Poverty*</b>  | <b>Alcohol</b> | 303,416 High (above poverty line)     | <b>1</b>   | OR<br>1.1-1.4 |
|                                     |                  |                | 167,727 Low (below poverty line)      | <b>1.2</b> |               |
|                                     |                  |                | regular use of any alcoholic beverage |            |               |
|                                     | <b>Caste**</b>   | <b>Alcohol</b> | 334,512 High                          | <b>1</b>   | OR<br>3-3.8   |
|                                     |                  |                | 136,631 Low                           | <b>3.4</b> |               |
|                                     | <b>Education</b> | <b>Alcohol</b> | 273,069 High (formal education)       | <b>1</b>   | OR<br>1.2-1.4 |
|                                     |                  |                | 188,956 Low (no formal education)     | <b>1.3</b> |               |

\*Planning commission of India definition - income required to ensure adequate intake of calories (INR 2,100 urban; INR 2,400 rural)

\*\*Scheduled Castes and tribes - identified in the Indian Constitution as especially disadvantaged or needy

adjusted for; age group, gender caste, income, residence, education

**Dhungana et al. (2014)** - Source of funding not reported

|                        |                                           |              |                    |                        |              |        |
|------------------------|-------------------------------------------|--------------|--------------------|------------------------|--------------|--------|
| cross-sectional<br>406 | Rural community in the Sindhuli district. | <b>Caste</b> | <b>Alcohol use</b> | High (Brahman/Chhetri) | <b>31.1%</b> | <0.001 |
|------------------------|-------------------------------------------|--------------|--------------------|------------------------|--------------|--------|

|                         |                  |                                            |                                                     |                                 |              |        |
|-------------------------|------------------|--------------------------------------------|-----------------------------------------------------|---------------------------------|--------------|--------|
| Nepal                   | Aged 20-50 years |                                            | use of alcohol until up to 30 days before interview | Middle (Adhibasi/Janajati)      | <b>56.2%</b> |        |
|                         |                  |                                            |                                                     | Low (Dalits)                    | <b>42.9%</b> |        |
|                         |                  | <b>Education</b>                           | <b>Alcohol use</b>                                  | Low (No formal education)       | <b>58.5%</b> | <0.001 |
|                         |                  |                                            |                                                     | Middle-low (lower than primary) | <b>55.2%</b> |        |
|                         |                  |                                            |                                                     | Middle-high (primary)           | <b>36.1%</b> |        |
|                         |                  |                                            |                                                     | High (Secondary and higher)     | <b>26.0%</b> |        |
|                         |                  | <b>SES (education, occupation, income)</b> | <b>Alcohol use</b>                                  | Lowest                          | <b>57.4%</b> | 0.012  |
|                         |                  |                                            |                                                     | Middle-low                      | <b>42.6%</b> |        |
|                         |                  |                                            |                                                     | Middle-high                     | <b>53.1%</b> |        |
|                         |                  |                                            |                                                     | Highest                         | <b>31.2%</b> |        |
| no adjustment described |                  |                                            |                                                     |                                 |              |        |

## Diet

**Hashibe et al. (2003)** - Funded by Assoc. Int Cancer Research; Imperial Cancer Research Fund; National Cancer Institute (USA) & UCLA Jonnson Cancer Centre Foundation

|                                                                                                                                |  |                   |                             |                             |              |         |
|--------------------------------------------------------------------------------------------------------------------------------|--|-------------------|-----------------------------|-----------------------------|--------------|---------|
| case-control Study examining SES and 47,773 premalignant oral lesions in India                                                 |  | <b>Income</b>     | <b>Fruits - high intake</b> | Low (INR<1500)              | <b>87.5%</b> |         |
| premalignant oral lesions in Kerala. Data is presented linking NCD risk factors with SES markers for the 47,773 controls only. |  |                   |                             | Middle-low (INR 1500-3000)  | <b>92.1%</b> |         |
| Aged >35 years                                                                                                                 |  |                   |                             | Middle-high (INR 3001-5000) | <b>93.0%</b> |         |
|                                                                                                                                |  |                   |                             | High (INR>5000)             | <b>93.9%</b> | <0.0001 |
|                                                                                                                                |  | <b>Education</b>  | <b>Fruits - high intake</b> | Low (None/illiterate)       | <b>79.4%</b> |         |
|                                                                                                                                |  |                   |                             | Middle-low (None/literate)  | <b>94.0%</b> |         |
|                                                                                                                                |  |                   |                             | Middle (Primary)            | <b>89.4%</b> |         |
|                                                                                                                                |  |                   |                             | Middle-high (Middle school) | <b>90.9%</b> |         |
|                                                                                                                                |  |                   |                             | High (>High schools)        | <b>93.5%</b> | <0.0001 |
|                                                                                                                                |  | <b>Occupation</b> | <b>Fruits- high intake</b>  | Manual                      | <b>89.4%</b> |         |
|                                                                                                                                |  |                   |                             | Teacher/office              | <b>95.2%</b> |         |
|                                                                                                                                |  |                   |                             | Business                    | <b>90.8%</b> |         |
|                                                                                                                                |  |                   |                             | Retired                     | <b>86.1%</b> |         |
|                                                                                                                                |  |                   |                             | Other                       | <b>94.9%</b> | <0.0001 |

|                         |                   |                         |                             |              |         |
|-------------------------|-------------------|-------------------------|-----------------------------|--------------|---------|
|                         | <b>Income</b>     | <b>Daily vegetables</b> | Low (INR<1500)              | <b>88.6%</b> |         |
|                         |                   |                         | Middle-low (INR 1500-3000)  | <b>96.2%</b> |         |
|                         |                   |                         | Middle-high (INR 3001-5000) | <b>97.5%</b> |         |
|                         |                   |                         | High (INR>5000)             | <b>98.5%</b> | <0.0001 |
|                         | <b>Education</b>  | <b>Daily vegetables</b> | None/illiterate             | <b>80.6%</b> |         |
|                         |                   |                         | None/literate               | <b>92.4%</b> |         |
|                         |                   |                         | Primary                     | <b>91.6%</b> |         |
|                         |                   |                         | Middle                      | <b>94.1%</b> |         |
|                         |                   |                         | >High schools               | <b>97.1%</b> | <0.0001 |
|                         | <b>Occupation</b> | <b>Daily vegetables</b> | Manual                      | <b>91.3%</b> |         |
|                         |                   |                         | Teacher/office              | <b>98.7%</b> |         |
|                         |                   |                         | Business                    | <b>95.6%</b> |         |
|                         |                   |                         | Retired                     | <b>94.6%</b> |         |
| no adjustment described |                   |                         | Other                       | <b>96.8%</b> | <0.0001 |

**Gupta et al. (2012)** - Funded by the South Asian Society of Atherosclerosis and Thrombosis

|                                                                                                                                                                                                         |                                                   |                                 |       |                              |              |
|---------------------------------------------------------------------------------------------------------------------------------------------------------------------------------------------------------|---------------------------------------------------|---------------------------------|-------|------------------------------|--------------|
| cross-sectional<br>6,198<br>India<br>General population in<br>middle-class areas of 11<br>cities, excluded house-<br>bound, pregnant and those<br>likely to die within 6<br>months.<br>Aged 18-75 years | <b>Education</b>                                  | <b>High dietary fat</b>         | 1,248 | Low (0-10 years)             | <b>46.2%</b> |
|                                                                                                                                                                                                         |                                                   | >20g/day                        | 2,956 | Middle (11-15 years)         | <b>49.8%</b> |
|                                                                                                                                                                                                         |                                                   |                                 | 1,366 | High (>15 years)             | <b>60.0%</b> |
|                                                                                                                                                                                                         | <b>Occupational Class</b>                         | <b>High dietary fat</b>         | 1,287 | Low (4-5)                    | <b>40.6%</b> |
|                                                                                                                                                                                                         | (British Social Register,<br>housewife = husband) |                                 | 1,677 | Middle (3 manual/non-manual) | <b>49.7%</b> |
|                                                                                                                                                                                                         |                                                   |                                 | 3,018 | High (1-2)                   | <b>55.7%</b> |
|                                                                                                                                                                                                         | <b>SES (self-assessed)</b>                        | <b>High dietary fat</b>         | 374   | Low (score 1-3)              | <b>41.8%</b> |
|                                                                                                                                                                                                         |                                                   |                                 | 3,622 | Middle (score 4-6)           | <b>53.1%</b> |
|                                                                                                                                                                                                         |                                                   |                                 | 1,114 | High (score 7-10)            | <b>61.6%</b> |
|                                                                                                                                                                                                         | <b>Education</b>                                  | <b>Low fruit and vegetables</b> | 1,248 | Low (0-10 years)             | <b>23.9%</b> |
|                                                                                                                                                                                                         |                                                   | <2 servings/day                 | 2,956 | Middle (11-15 years)         | <b>29.3%</b> |

## All High Quality Studies

|                          |                                                   |                                 |       |                              |              |  |
|--------------------------|---------------------------------------------------|---------------------------------|-------|------------------------------|--------------|--|
|                          |                                                   |                                 | 1,366 | High (>15 years)             | <b>28.9%</b> |  |
|                          | <b>Occupational Class</b>                         | <b>Low fruit and vegetables</b> | 1,287 | Low (4-5)                    | <b>26.9%</b> |  |
|                          | (British Social Register,<br>housewife = husband) |                                 | 1,677 | Middle (3 manual/non-manual) | <b>26.8%</b> |  |
|                          |                                                   |                                 | 3,018 | High (1-2)                   | <b>26.4%</b> |  |
|                          | <b>SES (self-assessed)</b>                        | <b>Low fruit and vegetables</b> | 374   | Low (score 1-3)              | <b>47.8%</b> |  |
|                          |                                                   |                                 | 3,622 | Middle (score 4-6)           | <b>24.7%</b> |  |
| adjusted for age and sex |                                                   |                                 | 1,114 | High (score 7-10)            | <b>21.8%</b> |  |

**Agrawal et al. (2014a)** - Funded by a Wellcome Trust Strategic Award Grant

|                         |                                                                                 |                                 |                                                   |        |                             |              |        |
|-------------------------|---------------------------------------------------------------------------------|---------------------------------|---------------------------------------------------|--------|-----------------------------|--------------|--------|
| cross-sectional         | Nationally representative                                                       | <b>Caste</b>                    | <b>Non-vegetarian</b>                             | 29,831 | Scheduled caste (poorest)   | <b>74.0%</b> | <0.001 |
| 156,317                 | 2005/6 National Family<br>Health Survey, participants aged<br>India 20-49 years |                                 | eats meat, fish, milk, eggs, curd, dairy products | 12,734 | Scheduled tribe (poorest)   | <b>75.2%</b> |        |
|                         |                                                                                 |                                 |                                                   | 60,977 | Other backward class (poor) | <b>60.4%</b> |        |
|                         |                                                                                 |                                 |                                                   | 48,854 | General (more affluent)     | <b>57.7%</b> |        |
|                         |                                                                                 | <b>SES (assets and housing)</b> | <b>Non-vegetarian</b>                             | 26,389 | Lowest                      | <b>71.1%</b> | <0.001 |
|                         |                                                                                 |                                 |                                                   | 28,751 | Low                         | <b>66.2%</b> |        |
|                         |                                                                                 |                                 |                                                   | 31,232 | Middle                      | <b>65.4%</b> |        |
|                         |                                                                                 |                                 |                                                   | 33,560 | High                        | <b>64.1%</b> |        |
| no adjustment described |                                                                                 |                                 |                                                   | 36,385 | Highest                     | <b>54.0%</b> |        |

**Agrawal et al. (2014b)** - Funded by the Wellcome Trust; Council for England; National Institute for Health Research Collaboration

|                         |                                                                                 |                                    |                               |  |                          |              |        |
|-------------------------|---------------------------------------------------------------------------------|------------------------------------|-------------------------------|--|--------------------------|--------------|--------|
| cross-sectional         | Nationally representative                                                       | <b>Caste</b>                       | <b>Daily fish consumption</b> |  | Low caste                | <b>3.4%</b>  | <0.001 |
| 156,317                 | 2005/6 National Family<br>Health Survey, participants aged<br>India 20-49 years |                                    |                               |  | Other caste              | <b>44.0%</b> |        |
|                         |                                                                                 | <b>Wealth (assets and housing)</b> | <b>Daily fish consumption</b> |  | Highest (top quintile)   | <b>39.1%</b> | <0.001 |
| no adjustment described |                                                                                 |                                    |                               |  | Lowest (bottom quintile) | <b>8.2%</b>  |        |

**Ganesan et al. (2012)** - No external funding

|                 |                                                                                                                                                                        |                        |                                            |  |        |              |         |
|-----------------|------------------------------------------------------------------------------------------------------------------------------------------------------------------------|------------------------|--------------------------------------------|--|--------|--------------|---------|
| cross-sectional | 1,261 Diabetics and 122 non-diabetics from the population-based urban Sankara Nethralaya Diabetic Retinopathy Epidemiology and Molecular Genetic Study. Aged >40 years |                        |                                            |  |        |              |         |
|                 |                                                                                                                                                                        | <b>SES (undefined)</b> | <b>Low fibre diet</b>                      |  | Low    | <b>11.9%</b> | 0.002   |
| India           |                                                                                                                                                                        |                        | fibre score <32 on validated questionnaire |  | Middle | <b>71.9%</b> | 0.237   |
|                 |                                                                                                                                                                        |                        |                                            |  | High   | <b>16.1%</b> | <0.0001 |
|                 |                                                                                                                                                                        | <b>SES (undefined)</b> | <b>High fibre diet</b>                     |  | Low    | <b>6.5%</b>  | 0.002   |
|                 |                                                                                                                                                                        |                        | fibre score >32 on validated questionnaire |  | Middle | <b>68.8%</b> | 0.237   |
|                 | no adjustment described                                                                                                                                                |                        |                                            |  | High   | <b>24.6%</b> | <0.0001 |

**Kinra et al. (2010)** - Funded by the Wellcome Trust

|                                          |                                  |                                       |                                       |                      |                      |              |           |
|------------------------------------------|----------------------------------|---------------------------------------|---------------------------------------|----------------------|----------------------|--------------|-----------|
| cross-section: Nationally representative | <b>SES (men) assets, housing</b> | <b>Low fruit and vegetable intake</b> | 147                                   | Low (asset score)    | <b>81.0%</b>         | 74.5-87      | <0.001    |
| 1,983                                    | sample of rural inhabitants      | <400g/day                             | 358                                   | Middle (asset score) | <b>75.6%</b>         | 71.2-79.9    |           |
| India                                    | from 1600 villages in 18 states. |                                       | 870                                   | High (asset score)   | <b>63.6%</b>         | 60.3-66.8    |           |
|                                          | Aged 20-69 years                 | <b>SES (women) assets, housing</b>    | <b>Low fruit and vegetable intake</b> | 106                  | Low (asset score)    | <b>86.6%</b> | <0.001    |
|                                          |                                  |                                       |                                       | 143                  | Middle (asset score) | <b>78.5%</b> | 71.4-85.5 |
|                                          | adjusted for age                 |                                       |                                       | 359                  | High (asset score)   | <b>69.9%</b> | 65.2-74.7 |

**Dhungana et al. (2014)** - Source of funding not reported

|                                       |                    |                                 |                                 |                                 |               |  |       |
|---------------------------------------|--------------------|---------------------------------|---------------------------------|---------------------------------|---------------|--|-------|
| cross-section: Rural community in the | <b>Caste</b>       | <b>Low fruit and vegetables</b> |                                 | High (Brahman/Chhetri)          | <b>100.0%</b> |  | 0.014 |
| 406                                   | Sindhuli district. | <400g/day                       |                                 | Middle (Adhibasi/Janajati)      | <b>94.5%</b>  |  |       |
| Nepal                                 | Aged 20-50 years   |                                 |                                 | Low (Dalits)                    | <b>100.0%</b> |  |       |
|                                       |                    | <b>Education</b>                | <b>Low fruit and vegetables</b> | Low (No formal education)       | <b>97.9%</b>  |  | 0.32  |
|                                       |                    |                                 |                                 | Middle-low (lower than primary) | <b>93.1%</b>  |  |       |
|                                       |                    |                                 |                                 | Middle-high (primary)           | <b>97.2%</b>  |  |       |
|                                       |                    |                                 |                                 | High (Secondary and higher)     | <b>95.5%</b>  |  |       |

|                         |                                               |                                 |             |              |  |       |
|-------------------------|-----------------------------------------------|---------------------------------|-------------|--------------|--|-------|
|                         | <b>SES</b><br>(education, occupation, income) | <b>Low fruit and vegetables</b> | Lowest      | <b>96.7%</b> |  | 0.001 |
|                         |                                               |                                 | Middle-low  | <b>98.9%</b> |  |       |
|                         |                                               |                                 | Middle-high | <b>96.9%</b> |  |       |
| no adjustment described |                                               |                                 | Highest     | <b>81.2%</b> |  |       |

**Zeba et al. (2014)** - Funded by the Canadian International Development Agency

|                               |                                                                                                                                                  |                    |                                                                                                    |                              |              |          |        |
|-------------------------------|--------------------------------------------------------------------------------------------------------------------------------------------------|--------------------|----------------------------------------------------------------------------------------------------|------------------------------|--------------|----------|--------|
| cross-sectional<br>300        | Burkinabe born and resident in Ouagadougou for >6 months. Excludes pregnant or lactating women and physically and mentally disabled individuals. | <b>Asset score</b> | <b>Unhealthy diet</b><br>high in fat, sugar, low in fibre, plant protein and complex carbohydrates | Low (tertile score)          | <b>19.1%</b> | 11.1-27  | 0.002  |
|                               |                                                                                                                                                  |                    |                                                                                                    | Medium (tertile score)       | <b>37.1%</b> | 27.1-47  | 0.4    |
| Burkina Faso Aged 25-60 years |                                                                                                                                                  |                    |                                                                                                    | High (tertile score)         | <b>43.8%</b> | 33.5-54  | 0.003  |
|                               |                                                                                                                                                  | <b>Education</b>   | <b>Unhealthy diet</b>                                                                              | Low (no formal)              | <b>24.7%</b> | 15.8-33  | <0.001 |
|                               |                                                                                                                                                  |                    |                                                                                                    | Medium (elementary)          | <b>15.7%</b> | 8.2-23.1 | 0.3    |
| no adjustment described       |                                                                                                                                                  |                    |                                                                                                    | High (High school and above) | <b>59.6%</b> | 49.4-69  | <0.001 |

**Tobaco**

**Bonu et al. (2005)** - Source of funding not reported

|                                                                                                                                                                  |                                                                                       |                                     |                                                                       |              |             |          |       |
|------------------------------------------------------------------------------------------------------------------------------------------------------------------|---------------------------------------------------------------------------------------|-------------------------------------|-----------------------------------------------------------------------|--------------|-------------|----------|-------|
| cross-sectional<br>22,685                                                                                                                                        | Hospitalised participants of the 1995/6 Indian National Sample Survey. Aged >10 years | <b>Current regular tobacco user</b> | <b>Poverty</b><br>borrowing/financial distress during hospitalisation | Non-user     | <b>1</b>    | OR       |       |
| India                                                                                                                                                            |                                                                                       |                                     |                                                                       | Tobacco user | <b>1.35</b> | 1.11-1.6 | <0.01 |
| adjusted for; head of household, age, sex, level of schooling, marital status, state. number of days of hospitalisation used to control for severity of illness. |                                                                                       |                                     |                                                                       |              |             |          |       |

**Hashibe et al. (2003)** - Funded by Assoc. Int Cancer Researc; Imperial Cancer Research Fund; National Cancer Institute (USA) & UCLA Jonnson Cancer Center Foundation

|                        |                                                                                |               |                        |                             |              |  |  |
|------------------------|--------------------------------------------------------------------------------|---------------|------------------------|-----------------------------|--------------|--|--|
| case-control<br>47,773 | Study examining SES and premalignant oral lesions in Kerala. Data is presented | <b>Income</b> | <b>Tobacco chewing</b> | Low (INR<1500)              | <b>34.3%</b> |  |  |
|                        |                                                                                |               |                        | Middle-low (INR 1500-3000)  | <b>22.9%</b> |  |  |
| India                  |                                                                                |               |                        | Middle-high (INR 3001-5000) | <b>17.0%</b> |  |  |

## All High Quality Studies

|                                                                                           |                   |                        |                             |         |         |
|-------------------------------------------------------------------------------------------|-------------------|------------------------|-----------------------------|---------|---------|
| linking NCD risk factors with SES markers for the 47,773 controls only.<br>Aged >35 years | <b>Education</b>  | <b>Tobacco chewing</b> | High (INR>5000)             | 11.2%   | <0.0001 |
|                                                                                           |                   |                        | Low (None/illiterate)       | 48.2%   |         |
|                                                                                           |                   |                        | Middle-low (None/literate)  | 45.7%   |         |
|                                                                                           |                   |                        | Middle (Primary)            | 33.7%   |         |
|                                                                                           |                   |                        | Middle-high (Middle school) | 26.4%   |         |
|                                                                                           |                   |                        | High (>High schools)        | 12.4%   | <0.0001 |
|                                                                                           | <b>Occupation</b> | <b>Tobacco chewing</b> | Manual                      | 29.0%   |         |
|                                                                                           |                   |                        | Teacher/office              | 10.9%   |         |
|                                                                                           |                   |                        | Business                    | 21.1%   |         |
|                                                                                           |                   |                        | Retired                     | 34.9%   |         |
|                                                                                           |                   |                        | Other                       | 23.8%   | <0.0001 |
|                                                                                           | <b>Income</b>     | <b>Smoking</b>         | Low (INR<1500)              | 28.8%   |         |
|                                                                                           |                   |                        | Middle-low (INR 1500-3000)  | 22.9%   |         |
|                                                                                           |                   |                        | Middle-high (INR 3001-5000) | 20.2%   |         |
|                                                                                           |                   |                        | High (INR>5000)             | 16.6%   | <0.0001 |
|                                                                                           | <b>Education</b>  | <b>Smoking</b>         | Low (None/illiterate)       | 19.7%   |         |
|                                                                                           |                   |                        | Middle-low (None/literate)  | 23.3%   |         |
|                                                                                           |                   |                        | Middle (Primary)            | 29.4%   |         |
|                                                                                           |                   |                        | Middle-high (Middle school) | 30.9%   |         |
|                                                                                           |                   |                        | High (>High schools)        | 23.8%   | <0.0001 |
| <b>Occupation</b>                                                                         | <b>Smoking</b>    | Manual                 | 22.6%                       |         |         |
|                                                                                           |                   | Teacher/office         | 28.4%                       |         |         |
|                                                                                           |                   | Business               | 54.3%                       |         |         |
|                                                                                           |                   | Retired                | 40.7%                       |         |         |
|                                                                                           |                   | Other                  | 52.3%                       | <0.0001 |         |
| No adjustment described                                                                   |                   |                        |                             |         |         |

**Corsi et al. (2014)** - Funded by Byrraju Found; Initiative for CV Health Research in Dev. Countries; National Health and Med Research Council (AUS); the George Found.

|                 |                            |                        |                    |       |                       |       |
|-----------------|----------------------------|------------------------|--------------------|-------|-----------------------|-------|
| cross-sectional | Representative sample from | <b>Education (men)</b> | <b>Ever smoker</b> | 2,205 | Low (None/illiterate) | 64.0% |
|-----------------|----------------------------|------------------------|--------------------|-------|-----------------------|-------|



## All High Quality Studies

|       |                                      |                          |                          |                                     |              |           |  |       |
|-------|--------------------------------------|--------------------------|--------------------------|-------------------------------------|--------------|-----------|--|-------|
| 4,534 | 20 villages in rural Andhra Pradesh. |                          | current or former smoker | Medium (Primary)                    | <b>57.9%</b> |           |  |       |
| India | Pradesh.                             |                          |                          | High (Secondary or higher)          | <b>37.7%</b> |           |  |       |
|       | Aged >20 years                       |                          |                          |                                     |              |           |  |       |
|       |                                      | <b>Education (women)</b> | <b>Ever smoker</b>       | 2,329 Low (None/Illiterate)         | <b>12.4%</b> |           |  |       |
|       |                                      |                          |                          | Medium (Primary)                    | <b>3.2%</b>  |           |  |       |
|       |                                      |                          |                          | High (Secondary or higher)          | <b>1.1%</b>  |           |  |       |
|       |                                      | <b>Education</b>         | <b>Current smoker</b>    | 4,535 Low (None/Illiterate)         | <b>3.25</b>  | 1.54-4.10 |  | <0.01 |
|       |                                      |                          |                          | Medium (Primary)                    | <b>1.87</b>  | 1.13-2.44 |  |       |
|       |                                      |                          |                          | High (Secondary or higher)          | <b>1</b>     | OR        |  |       |
|       |                                      | <b>Income (men)</b>      | <b>Ever smoker</b>       | 2,205 Extremely Low (<US\$0.50/day) | <b>62.2%</b> |           |  |       |
|       |                                      |                          |                          | Very Low (\$0.50-1/day)             | <b>57.5%</b> |           |  |       |
|       |                                      |                          |                          | Low (US\$1-2/day)                   | <b>55.9%</b> |           |  |       |
|       |                                      |                          |                          | Higher (US\$>2/day)                 | <b>50.7%</b> |           |  |       |
|       |                                      | <b>Income (women)</b>    | <b>Ever smoker</b>       | 2,329 Extremely Low (<US\$0.50/day) | <b>19.1%</b> |           |  |       |
|       |                                      |                          |                          | Very Low (\$0.50-1/day)             | <b>7.3%</b>  |           |  |       |
|       |                                      |                          |                          | Low (US\$1-2/day)                   | <b>7.7%</b>  |           |  |       |
|       |                                      |                          |                          | Higher (US\$>2/day)                 | <b>4.3%</b>  |           |  |       |
|       |                                      | <b>Income (men)</b>      | <b>Current smoker</b>    | 4,535 Extremely Low (<US\$0.50/day) | <b>1.5</b>   | 1.06-2.10 |  | <0.05 |
|       |                                      |                          |                          | Very Low (\$0.50-1/day)             | <b>1.15</b>  | 0.88-1.49 |  |       |
|       |                                      |                          |                          | Low (US\$1-2/day)                   | <b>1.12</b>  | 0.89-1.42 |  |       |
|       |                                      |                          |                          | Higher (US\$>2/day)                 | <b>1</b>     | OR        |  |       |

No adjustment described for percentages  
Odds ratios adjusted for age, sex, occupation, income

**Kinra et al. (2010)** - Funded by the Wellcome Trust

|                          |                                                                                        |                                  |               |                       |              |         |  |        |
|--------------------------|----------------------------------------------------------------------------------------|----------------------------------|---------------|-----------------------|--------------|---------|--|--------|
| cross-sectional<br>1,983 | Nationally representative sample of rural inhabitants from 1600 villages in 18 states. | <b>SES (men) assets, housing</b> | <b>Smoker</b> | 147 Low (asset score) | <b>36.8%</b> | 29.6-44 |  | <0.001 |
|--------------------------|----------------------------------------------------------------------------------------|----------------------------------|---------------|-----------------------|--------------|---------|--|--------|

## All High Quality Studies

|       |                  |                             |        |                                                        |                          |              |           |     |
|-------|------------------|-----------------------------|--------|--------------------------------------------------------|--------------------------|--------------|-----------|-----|
| India | Aged 20-69 years | SES (women) assets, housing | Smoker | daily tobacco smoking at any time in the last 6 months | 358 Middle (asset score) | <b>28.1%</b> | 23.5-32.7 |     |
|       |                  |                             |        |                                                        | 870 High (asset score)   | <b>14.7%</b> | 12.3-17.1 |     |
|       |                  |                             |        |                                                        | 106 Low (asset score)    | <b>1.2%</b>  | 0-2.9     | 0.2 |
|       |                  |                             |        |                                                        | 143 Middle (asset score) | <b>1.1%</b>  | 0-2.6     |     |
|       |                  |                             |        |                                                        | 359 High (asset score)   | <b>0.3%</b>  | 0-0.8     |     |

adjusted for age

**Neufeld et al. (2005)** - No external funding

|                                     |                                                                    |                  |                      |                                   |            |         |
|-------------------------------------|--------------------------------------------------------------------|------------------|----------------------|-----------------------------------|------------|---------|
| cross-sectional<br>471,143<br>India | Data from the 1995/6 Indian National Sample Survey. Aged >10 years | <b>Poverty*</b>  | <b>Smoke tobacco</b> | 303,416 High (above poverty line) | <b>1</b>   | OR      |
|                                     |                                                                    |                  |                      | 167,727 Low (below poverty line)  | <b>1</b>   | 1-1.1   |
|                                     |                                                                    | <b>Caste**</b>   | <b>Smoke tobacco</b> | 334,512 High                      | <b>1</b>   | OR      |
|                                     |                                                                    |                  |                      | 136,631 Low                       | <b>1.4</b> | 1.3-1.5 |
|                                     |                                                                    | <b>Education</b> | <b>Smoke tobacco</b> | 273,069 High (formal education)   | <b>1</b>   | OR      |
|                                     |                                                                    |                  |                      | 188,956 Low (no formal education) | <b>1.7</b> | 1.6-1.8 |
|                                     |                                                                    | <b>Poverty*</b>  | <b>Chew tobacco</b>  | 303,416 High (above poverty line) | <b>1</b>   | OR      |
|                                     |                                                                    |                  |                      | 167,727 Low (below poverty line)  | <b>1.5</b> | 1.4-1.6 |
|                                     |                                                                    | <b>Caste**</b>   | <b>Chew tobacco</b>  | 334,512 High                      | <b>1</b>   | OR      |
|                                     |                                                                    |                  |                      | 136,631 Low                       | <b>1.5</b> | 1.4-1.6 |
|                                     |                                                                    | <b>Education</b> | <b>Chew tobacco</b>  | 273,069 High (formal education)   | <b>1</b>   | OR      |
|                                     |                                                                    |                  |                      | 188,956 Low (no formal education) | <b>1.2</b> | 1.1-1.3 |

adjusted for age group, gender caste, income, residence, education

\*Planning commission of india definition - income required to ensure adequate intake of calories (INR 2,100 urban; INR 2,400 rural)

\*\*Scheduled Castes and tribes - identified in the Indian Constituion as especially disadvantaged or needy

**Gupta et al. (2003)** - Source of funding not reported

|                        |                                                                                                              |                          |                                                             |                               |              |  |
|------------------------|--------------------------------------------------------------------------------------------------------------|--------------------------|-------------------------------------------------------------|-------------------------------|--------------|--|
| cross-sectional<br>573 | Serial cross-sectional surveys from the general population of Jaipur. Data taken from the most recent round. |                          |                                                             |                               |              |  |
| India                  | Age not reported                                                                                             | <b>Education (men)</b>   | <b>Smoker</b><br>past or present use of any tobacco product | 103 Low (no formal education) | <b>54.4%</b> |  |
|                        |                                                                                                              |                          |                                                             | 182 Middle-low (1-10 years)   | <b>42.9%</b> |  |
|                        |                                                                                                              |                          |                                                             | 202 Middle-high (11-15 years) | <b>28.7%</b> |  |
|                        |                                                                                                              |                          |                                                             | 63 High (>16 years)           | <b>23.8%</b> |  |
|                        |                                                                                                              | <b>Education (women)</b> | <b>Smoker</b>                                               | 213 Low (no formal education) | <b>28.2%</b> |  |
|                        |                                                                                                              |                          |                                                             | 163 Middle-low (1-10 years)   | <b>3.1%</b>  |  |
|                        |                                                                                                              |                          |                                                             | 161 Middle-high (11-15 years) | <b>0.6%</b>  |  |
|                        |                                                                                                              |                          |                                                             | 36 High (>16 years)           | <b>2.8%</b>  |  |
|                        | adjusted for age                                                                                             |                          |                                                             |                               |              |  |

**Singh et al. (2000)** - Sandoz (Novartis) Foundation of Gerontologic Research (AUS); World Health Federation

|                          |                                                 |                                                             |                                            |                 |             |      |
|--------------------------|-------------------------------------------------|-------------------------------------------------------------|--------------------------------------------|-----------------|-------------|------|
| cross-sectional<br>1,767 | Residents of two villages in rural north India. |                                                             |                                            |                 |             |      |
| India                    | Aged 25-64 years                                | <b>SES (education, occupation, income, assets, housing)</b> | <b>Use tobacco</b><br>uses tobacco >1/week | 985 High        | <b>8.1%</b> | 0.09 |
|                          |                                                 |                                                             |                                            | 790 Medium-high | <b>5.9%</b> |      |
|                          |                                                 |                                                             |                                            | 774 Medium      | <b>6.7%</b> |      |
|                          |                                                 |                                                             |                                            | 602 Medium-low  | <b>7.9%</b> |      |
|                          | No adjustment described                         |                                                             |                                            | 206 Low         | <b>8.7%</b> |      |

**Gupta et al. (2012)** - Funded by the South Asian Society of Atherosclerosis and Thrombosis

|                          |                                                                                                                                |                                                                          |                                                      |                                    |              |  |
|--------------------------|--------------------------------------------------------------------------------------------------------------------------------|--------------------------------------------------------------------------|------------------------------------------------------|------------------------------------|--------------|--|
| cross-sectional<br>6,198 | General population in middle-class areas of 11 cities, excluded house-bound, pregnant and those likely to die within 6 months. | <b>Education</b>                                                         | <b>Tobacco use</b><br>daily use of a tobacco product | 1,248 Low (0-10 years)             | <b>24.3%</b> |  |
| India                    | Aged 18-75 years                                                                                                               | <b>Occupational Class (British Social Register, housewife = husband)</b> | <b>Tobacco use</b>                                   | 2,956 Middle (11-15 years)         | <b>14.4%</b> |  |
|                          |                                                                                                                                |                                                                          |                                                      | 1,366 High (>15 years)             | <b>19.0%</b> |  |
|                          |                                                                                                                                |                                                                          |                                                      | 1,287 Low (4-5)                    | <b>16.1%</b> |  |
|                          |                                                                                                                                |                                                                          |                                                      | 1,677 Middle (3 manual/non-manual) | <b>20.3%</b> |  |
|                          |                                                                                                                                |                                                                          |                                                      | 3,018 High (1-2 )                  | <b>16.7%</b> |  |
|                          |                                                                                                                                | <b>SES (self-assessed)</b>                                               | <b>Tobacco use</b>                                   | 374 Low (score 1-3)                | <b>17.6%</b> |  |

|                          |  |  |  |                          |              |  |  |
|--------------------------|--|--|--|--------------------------|--------------|--|--|
|                          |  |  |  | 3,622 Middle (score 4-6) | <b>19.6%</b> |  |  |
| adjusted for age and sex |  |  |  | 1,114 High ( score 7-10) | <b>15.5%</b> |  |  |

**Reddy et al. (2007)** - Funded by the Indian Ministry of Health; WHO

|                                 |                                                                                             |                          |                                                |                                        |            |          |        |
|---------------------------------|---------------------------------------------------------------------------------------------|--------------------------|------------------------------------------------|----------------------------------------|------------|----------|--------|
| cross-sectional-19,969          | Industrial workers and their relatives from ten urban sites across India. Aged 20-69 years. |                          |                                                |                                        |            |          |        |
| India                           |                                                                                             | <b>Education (men)</b>   | <b>Tobacco use</b>                             | 1,611 High (postgraduate)              | <b>1</b>   | OR       | <0.001 |
|                                 |                                                                                             |                          | use of any tobacco product in previous 30 days | 2,607 Middle-high (secondary-tertiary) | <b>1.3</b> | 1.1-1.5  |        |
|                                 |                                                                                             |                          |                                                | 5,820 Middle-low (primary-secondary)   | <b>1.9</b> | 1.6-2.2  |        |
|                                 |                                                                                             |                          |                                                | 1,859 Low (none-primary)               | <b>6.5</b> | 5.2-8.1  |        |
|                                 |                                                                                             | <b>Education (women)</b> | <b>Tobacco use</b>                             | 960 High (postgraduate)                | <b>1</b>   | OR       | <0.001 |
|                                 |                                                                                             |                          |                                                | 1,635 Middle-high (secondary-tertiary) | <b>1.1</b> | 0.8-1.3  |        |
|                                 |                                                                                             |                          |                                                | 2,832 Middle-low (primary-secondary)   | <b>1.1</b> | 0.76-1.4 |        |
| adjusted for age and occupation |                                                                                             |                          |                                                | 2,645 Low (none-primary)               | <b>8.2</b> | 6.4-9.9  |        |

**Singh et al. (2007)** - Funded by the Center of Nutrition Research, International College of Nutrition (India)

|                         |                                                                                                          |                                                                 |                            |             |              |  |                                             |
|-------------------------|----------------------------------------------------------------------------------------------------------|-----------------------------------------------------------------|----------------------------|-------------|--------------|--|---------------------------------------------|
| cross-sectional-2,222   | Spouses/relatives surveyed about their deceased from 1999-2001, who lived in Moradabad. Aged 25-64 years |                                                                 |                            |             |              |  |                                             |
| India                   |                                                                                                          | <b>SES (men) education, occupation, income, assets, housing</b> | <b>Tobacco consumption</b> | 264 Highest | <b>58.0%</b> |  | >0.05*                                      |
|                         |                                                                                                          |                                                                 | use of tobacco product     | 345 High    | <b>51.0%</b> |  |                                             |
|                         |                                                                                                          |                                                                 |                            | 290 Middle  | <b>47.6%</b> |  |                                             |
|                         |                                                                                                          |                                                                 |                            | 277 Low     | <b>42.6%</b> |  |                                             |
|                         |                                                                                                          |                                                                 |                            | 209 Lowest  | <b>51.2%</b> |  |                                             |
|                         |                                                                                                          | <b>SES (men) education, occupation, income, assets, housing</b> | <b>Tobacco consumption</b> | 163 Highest | <b>13.5%</b> |  | <0.05*                                      |
|                         |                                                                                                          |                                                                 | use of tobacco product     | 221 High    | <b>15.4%</b> |  |                                             |
|                         |                                                                                                          |                                                                 |                            | 169 Middle  | <b>11.2%</b> |  |                                             |
|                         |                                                                                                          |                                                                 |                            | 159 Low     | <b>19.5%</b> |  |                                             |
|                         |                                                                                                          |                                                                 |                            | 125 Lowest  | <b>21.6%</b> |  |                                             |
| No adjustment described |                                                                                                          |                                                                 |                            |             |              |  | *comparing highest-middle vs low and lowest |

**Samuel et al. (2012)** - Funded by the British Heart Foundation

|                          |                                                                                                              |                             |                    |                                |            |         |
|--------------------------|--------------------------------------------------------------------------------------------------------------|-----------------------------|--------------------|--------------------------------|------------|---------|
| cross-sectional<br>2,218 | Young adults from population-based birth cohort in rural and urban areas of southern India. Aged 26-32 years | <b>Wealth (asset score)</b> | <b>Tobacco use</b> | Lowest (quintile 1)            | <b>1</b>   | OR      |
| India                    |                                                                                                              |                             | current user       | Low (quinile 2)                | <b>0.6</b> | 0.4-0.9 |
|                          |                                                                                                              |                             |                    | Middle (quintile 3)            | <b>0.5</b> | 0.3-0.7 |
|                          |                                                                                                              |                             |                    | High (quinile 4)               | <b>0.5</b> | 0.4-0.9 |
|                          |                                                                                                              |                             |                    | Highest (Quintile 5)           | <b>0.4</b> | 0.2-0.6 |
|                          |                                                                                                              | <b>Education</b>            | <b>Tobacco use</b> | Low (0 years formal schooling) | <b>1</b>   | OR      |
|                          |                                                                                                              |                             |                    | Middle-low (1-8 years)         | <b>0.8</b> | 0.5-1.4 |
|                          |                                                                                                              |                             |                    | Middle-high (9-12)             | <b>0.5</b> | 0.3-0.9 |
|                          |                                                                                                              |                             |                    | High (>12 years)               | <b>0.2</b> | 0.1-0.4 |

adjusted for gender, place of residence, possessions score, adult educational status, paternal education  
*Multiple logistic regression analysis; gender, place of residence, possessions score, adult educational status, paternal educational status*

**Gupta et al. (2015)** - Funded by the South Asian Society of Atherosclerosis and Thrombosis

|                          |                                                                                                                                               |                  |                                                    |                            |             |       |
|--------------------------|-----------------------------------------------------------------------------------------------------------------------------------------------|------------------|----------------------------------------------------|----------------------------|-------------|-------|
| cross-sectional<br>6,198 | General population in middle-class areas of 11 cities, excluded house-bound, pregnant and those likely to die within 6 months. Aged >20 years | <b>Education</b> | <b>Quit tobacco</b>                                | 1,248 Low (0-10 years)     | <b>1.6%</b> | 0.139 |
| India                    |                                                                                                                                               |                  | quit for >1year having used for >1 year previously | 2,956 Middle (11-15 years) | <b>2.8%</b> |       |
|                          |                                                                                                                                               |                  |                                                    | 1,366 High (>15 years)     | <b>5.5%</b> |       |

adjusted for age and sex

**Jena et al. (2012)** - Source of funding not reported

|                           |                                                                                                                         |                   |                         |               |             |                 |
|---------------------------|-------------------------------------------------------------------------------------------------------------------------|-------------------|-------------------------|---------------|-------------|-----------------|
| cross-sectional<br>69,296 | Smokers from 29 territories, from the nationally representative 2009 Indian Global Adult Tobacco Survey. Aged >15 years | <b>Occupation</b> | <b>Hardcore smoker*</b> | Employee      | <b>1</b>    | OR              |
| India                     |                                                                                                                         |                   |                         | Student       | <b>2.40</b> | 1.16-4.91 0.018 |
|                           |                                                                                                                         |                   |                         | Self-employed | <b>2.64</b> | 1.28-5.41 0.008 |
|                           |                                                                                                                         |                   |                         | Homemaker     | <b>2.49</b> | 1.18-5.20 0.017 |

|                                                                                                                                                                                                                                   |                  |                         |                                           |             |           |       |
|-----------------------------------------------------------------------------------------------------------------------------------------------------------------------------------------------------------------------------------|------------------|-------------------------|-------------------------------------------|-------------|-----------|-------|
|                                                                                                                                                                                                                                   |                  |                         | Retired or unemployed                     | <b>2.24</b> | 1.07-4.6! | 0.033 |
|                                                                                                                                                                                                                                   | <b>Education</b> | <b>Hardcore smoker*</b> | Low (no formal education)                 | <b>1</b>    | OR        |       |
| Multivariate logistic regression, variables not reported                                                                                                                                                                          |                  |                         | Medium-low (primary incomplete)           | <b>0.96</b> | 0.84-1.10 | 0.569 |
| <i>*Proportion of daily smokers who have not attempted to quit in prev 12 months/ last attempt was &lt;24h and no intention to quit in next 12 months if at all, smokes within 30 mins of waking and knows smoking is harmful</i> |                  |                         | Medium (primary but secondary incomplete) | <b>1.01</b> | 0.90-1.11 | 0.900 |
|                                                                                                                                                                                                                                   |                  |                         | High (secondary and above)                | <b>1.00</b> | 0.85-1.11 | 0.990 |

**Narayan et al. (1996)** - Funded by the Sitaram Bhartia Institute of Science and Research

|                                             |                                |                           |                                                           |                         |             |           |
|---------------------------------------------|--------------------------------|---------------------------|-----------------------------------------------------------|-------------------------|-------------|-----------|
| cross-sectional<br>13,558<br>years<br>India | Residents of Delhi. Aged 25-64 | <b>Education (men)</b>    | <b>Smoker</b>                                             | Low (none)              | <b>1.75</b> | 1.52-2.02 |
|                                             |                                |                           | currently smoking or had smoked >100 cigarettes or beedis | Middle-low (primary)    | <b>1.29</b> | 1.12-1.48 |
|                                             |                                |                           |                                                           | Middle-low (primary)    | <b>1.06</b> | 0.94-1.19 |
|                                             |                                |                           |                                                           | Middle-high (secondary) | <b>0.84</b> | 0.75-0.94 |
|                                             |                                |                           |                                                           | High (college)          | <b>1</b>    | OR        |
|                                             |                                | <b>Education (women)</b>  | <b>Smoker</b>                                             | Low (none)              | <b>3.72</b> | 2.66-4.82 |
|                                             |                                |                           |                                                           | Middle-low (primary)    | <b>1.13</b> | 0.79-1.63 |
|                                             |                                |                           |                                                           | Middle-low (primary)    | <b>0.94</b> | 0.59-1.50 |
|                                             |                                |                           |                                                           | Middle-high (secondary) | <b>0.44</b> | 0.24-0.79 |
|                                             |                                |                           |                                                           | High (college)          | <b>1</b>    | OR        |
|                                             |                                | <b>Occupation (men)</b>   | <b>Smoker</b>                                             | High (I)                | <b>1</b>    | OR        |
|                                             |                                |                           |                                                           | Medium-high (II)        | <b>1.15</b> | 0.96-1.38 |
|                                             |                                |                           |                                                           | Medium-low (III)        | <b>0.8</b>  | 0.63-1.02 |
|                                             |                                |                           |                                                           | Low (IV)                | <b>1.39</b> | 1.13-1.70 |
|                                             |                                | <b>Occupation (women)</b> | <b>Smoker</b>                                             | High (I)                | <b>1</b>    | OR        |
|                                             |                                |                           |                                                           | Medium-high (II)        | <b>1.47</b> | 0.47-4.62 |
|                                             |                                |                           |                                                           | Medium-low (III)        | <b>0.87</b> | 0.32-2.41 |
|                                             |                                |                           |                                                           | Low (IV)                | <b>1.91</b> | 0.64-5.70 |

adjusted for income, education, marital status, religion, occupation, physical activity, leisure activity, BMI, drinking status, meat intake, egg eating, vegetarian status, family history heart disease

**Rani et al. (2003)** - Source of funding not reported

|                                                                                                          |                                                         |                           |                  |             |        |        |
|----------------------------------------------------------------------------------------------------------|---------------------------------------------------------|---------------------------|------------------|-------------|--------|--------|
| cross-section; Data from the 1998/9<br>334,553 National Family Health<br>India Survey.<br>Aged >15 years | <b>Household wealth (men)<br/>dwelling and assets</b>   | <b>Smoke tobacco</b>      | Highest quintile | <b>1</b>    | OR     | ref    |
|                                                                                                          |                                                         |                           | Second quintile  | <b>1.53</b> |        | <0.001 |
|                                                                                                          |                                                         |                           | Middle quintile  | <b>1.94</b> |        | <0.001 |
|                                                                                                          |                                                         |                           | Fourth quintile  | <b>2.11</b> |        | <0.001 |
|                                                                                                          |                                                         |                           | Lowest quintile  | <b>2.26</b> |        | <0.001 |
|                                                                                                          | <b>Household wealth (men)<br/>dwelling and assets</b>   | <b>Chew tobacco</b>       | Highest quintile | <b>1</b>    | OR     | ref    |
|                                                                                                          |                                                         |                           | Second quintile  | <b>1.4</b>  |        | <0.001 |
|                                                                                                          |                                                         |                           | Middle quintile  | <b>1.55</b> |        | <0.001 |
|                                                                                                          |                                                         |                           | Fourth quintile  | <b>1.69</b> |        | <0.001 |
|                                                                                                          |                                                         |                           | Lowest quintile  | <b>1.93</b> |        | <0.001 |
|                                                                                                          | <b>Household wealth (women)<br/>dwelling and assets</b> | <b>Smoke tobacco</b>      | Highest quintile | <b>1</b>    | OR     | ref    |
|                                                                                                          |                                                         |                           | Second quintile  | <b>1.57</b> |        | <0.001 |
|                                                                                                          |                                                         |                           | Middle quintile  | <b>2.68</b> |        | <0.001 |
|                                                                                                          |                                                         |                           | Fourth quintile  | <b>3.26</b> |        | <0.001 |
|                                                                                                          |                                                         |                           | Lowest quintile  | <b>4.32</b> |        | <0.001 |
|                                                                                                          | <b>Household wealth (women)<br/>dwelling and assets</b> | <b>Chew tobacco</b>       | Highest quintile | <b>1</b>    | OR     | ref    |
|                                                                                                          |                                                         |                           | Second quintile  | <b>1.52</b> |        | <0.001 |
|                                                                                                          |                                                         |                           | Middle quintile  | <b>1.92</b> |        | <0.001 |
|                                                                                                          |                                                         |                           | Fourth quintile  | <b>2.15</b> |        | <0.001 |
|                                                                                                          |                                                         |                           | Lowest quintile  | <b>2.58</b> |        | <0.001 |
| <b>Education (men)</b>                                                                                   | <b>Smoke tobacco</b>                                    | High (>11 years)          | <b>1</b>         | OR          | ref    |        |
|                                                                                                          |                                                         | Medium-high (6-10 years)  | <b>1.84</b>      |             | <0.001 |        |
|                                                                                                          |                                                         | Medium-low (1-5 years)    | <b>2.72</b>      |             | <0.001 |        |
|                                                                                                          |                                                         | Low (No formal education) | <b>3.17</b>      |             | <0.001 |        |
| <b>Education (men)</b>                                                                                   | <b>Chew tobacco</b>                                     | High (>11 years)          | <b>1</b>         | OR          | ref    |        |
|                                                                                                          |                                                         | Medium-high (6-10 years)  | <b>1.48</b>      |             | <0.001 |        |
|                                                                                                          |                                                         | Medium-low (1-5 years)    | <b>1.86</b>      |             | <0.001 |        |

|                          |                      |                               |             |    |        |
|--------------------------|----------------------|-------------------------------|-------------|----|--------|
|                          |                      | Low (No formal education)     | <b>1.92</b> |    | <0.001 |
| <b>Education (women)</b> | <b>Smoke tobacco</b> | High (>11 years)              | <b>1</b>    | OR |        |
|                          |                      | Medium-high (6-10 years)      | <b>1.73</b> |    | >0.05  |
|                          |                      | Medium-low (1-5 years)        | <b>2.82</b> |    | <0.05  |
|                          |                      | Low (No formal education)     | <b>6.25</b> |    | <0.001 |
| <b>Education (women)</b> | <b>Chew tobacco</b>  | High (>11 years)              | <b>1</b>    | OR |        |
|                          |                      | Medium-high (6-10 years)      | <b>2.05</b> |    | <0.001 |
|                          |                      | Medium-low (1-5 years)        | <b>3.81</b> |    | <0.001 |
|                          |                      | Low (No formal education)     | <b>4.97</b> |    | <0.001 |
| <b>Caste (men)</b>       | <b>Smoke tobacco</b> | High (Forward/general caste)  | <b>1</b>    | OR |        |
|                          |                      | Medium (Other backward caste) | <b>1.01</b> |    | >0.05  |
|                          |                      | Low (Scheduled caste)         | <b>1.2</b>  |    | <0.001 |
|                          |                      | Low (Scheduled tribe)         | <b>1.05</b> |    | >0.05  |
| <b>Caste (men)</b>       | <b>Chew tobacco</b>  | High (Forward/general caste)  | <b>1</b>    | OR |        |
|                          |                      | Medium (Other backward caste) | <b>1.07</b> |    | <0.05  |
|                          |                      | Low (Scheduled caste)         | <b>1.12</b> |    | <0.05  |
|                          |                      | Low (Scheduled tribe)         | <b>1.23</b> |    | <0.001 |
| <b>Caste (women)</b>     | <b>Smoke tobacco</b> | High (Forward/general caste)  | <b>1</b>    | OR |        |
|                          |                      | Medium (Other backward caste) | <b>1.09</b> |    | <0.001 |
|                          |                      | Low (Scheduled caste)         | <b>1.34</b> |    | >0.05  |
|                          |                      | Low (Scheduled tribe)         | <b>1.49</b> |    | <0.05  |
| <b>Caste (women)</b>     | <b>Chew tobacco</b>  | High (Forward/general caste)  | <b>1</b>    | OR |        |
|                          |                      | Medium (Other backward caste) | <b>1.14</b> |    | >0.05  |
|                          |                      | Low (Scheduled caste)         | <b>1.62</b> |    | <0.001 |
|                          |                      | Low (Scheduled tribe)         | <b>2.49</b> |    | <0.001 |

adjusted for wealth, years of schooling, religion, caste, age, sex, urban/rural



|                                                                                                                  |                                                                                          |                  |                                                                              |                    |             |           |
|------------------------------------------------------------------------------------------------------------------|------------------------------------------------------------------------------------------|------------------|------------------------------------------------------------------------------|--------------------|-------------|-----------|
| cross-sectional<br>19,934<br>Bangladesh                                                                          | Married Bangladeshi adults from a longitudinal arsenic study (HEALS).<br>Age 18-75 years | <b>Education</b> | <b>Betel quid</b><br>use with or without tobacco (82.5% use it with tobacco) | Low (no formal)    | <b>2</b>    | 1.81-2.20 |
|                                                                                                                  |                                                                                          |                  |                                                                              | Middle (1-5 years) | <b>1.65</b> | 1.49-1.82 |
|                                                                                                                  |                                                                                          |                  |                                                                              | High (>6 years)    | <b>1</b>    | OR        |
| adjusted for gender, age, marital status, occupation, religion, land ownership, TV ownership, smoking pack years |                                                                                          |                  |                                                                              |                    |             |           |

**Kishore et al. (2013)** - Source of funding not reported

|                           |                                                                                                                                                              |                                                                  |                                                                            |                                     |             |          |      |
|---------------------------|--------------------------------------------------------------------------------------------------------------------------------------------------------------|------------------------------------------------------------------|----------------------------------------------------------------------------|-------------------------------------|-------------|----------|------|
| cross-sectional<br>92,491 | Data from Global Adult Tobacco Survey data from India 2009/10 (69,296 individuals), Thailand 2009 (20,566 individuals), Bangladesh 2009 (9,629 individuals). | <b>Education (India)</b>                                         | <b>Hardcore smoker*</b><br>odds of daily smoker becoming a hardcore smoker | 24,309,857 High (college and above) | <b>1</b>    | OR       |      |
|                           | India, Thailand Aged >15 years                                                                                                                               |                                                                  |                                                                            | Medium-high (higher second)         | <b>0.98</b> | 0.66-1.4 | 0.91 |
|                           |                                                                                                                                                              |                                                                  |                                                                            | Medium-low (up to primary)          | <b>0.96</b> | 0.62-1.4 | 0.85 |
|                           |                                                                                                                                                              |                                                                  |                                                                            | Low (no formal education)           | <b>1.1</b>  | 0.72-1.6 | 0.65 |
|                           |                                                                                                                                                              | <b>Wealth Index (India)</b><br>principal component analysis      | <b>Hardcore smoker</b>                                                     | 24,309,857 Highest                  | <b>1</b>    | OR       |      |
|                           |                                                                                                                                                              |                                                                  |                                                                            | Lowest                              | <b>1.27</b> | 0.9-1.7  | 0.17 |
|                           |                                                                                                                                                              |                                                                  |                                                                            | Second                              | <b>1.29</b> | 0.92-1.8 | 0.14 |
|                           |                                                                                                                                                              |                                                                  |                                                                            | Middle                              | <b>1.17</b> | 0.85-1.6 | 0.33 |
|                           |                                                                                                                                                              |                                                                  |                                                                            | Fourth                              | <b>1.08</b> | 0.80-1.4 | 0.6  |
|                           |                                                                                                                                                              | <b>Education (Bangladesh)</b>                                    | <b>Hardcore smoker</b>                                                     | 3,651,921 High (college and above)  | <b>1</b>    | OR       |      |
|                           |                                                                                                                                                              |                                                                  |                                                                            | Medium-high (higher second)         | <b>2.39</b> | 0.83-6.9 | 0.11 |
|                           |                                                                                                                                                              |                                                                  |                                                                            | Medium-low (up to primary)          | <b>1.9</b>  | 0.65-5.6 | 0.24 |
|                           |                                                                                                                                                              |                                                                  |                                                                            | Low (no formal education)           | <b>2.26</b> | 0.78-6.9 | 0.13 |
|                           |                                                                                                                                                              | <b>Wealth Index (Bangladesh)</b><br>principal component analysis | <b>Hardcore smoker</b>                                                     | 3,651,921 Highest                   | <b>1</b>    | OR       |      |
|                           |                                                                                                                                                              |                                                                  |                                                                            | Lowest                              | <b>3.15</b> | 1.67-5.9 | 0    |
|                           |                                                                                                                                                              |                                                                  |                                                                            | Second                              | <b>2.68</b> | 1.12-5.6 | 0    |
|                           |                                                                                                                                                              |                                                                  |                                                                            | Middle                              | <b>1.93</b> | 1.07-3.9 | 0.03 |

|                                                                                                                                                                 |                                |                        |                                    |             |          |      |
|-----------------------------------------------------------------------------------------------------------------------------------------------------------------|--------------------------------|------------------------|------------------------------------|-------------|----------|------|
|                                                                                                                                                                 |                                |                        | Fourth                             | <b>1.49</b> | 0.83-2.6 | 0.18 |
|                                                                                                                                                                 | <b>Education (Thailand)</b>    | <b>Hardcore smoker</b> | 3,180,566 High (college and above) | <b>1</b>    | OR       |      |
|                                                                                                                                                                 |                                |                        | Medium-high (higher second)        | <b>0.9</b>  | 0.59-1.3 | 0.63 |
|                                                                                                                                                                 |                                |                        | Medium-low (up to primary)         | <b>1.07</b> | 0.70-1.6 | 0.76 |
|                                                                                                                                                                 |                                |                        | Low (no formal education)          | <b>0.96</b> | 0.51-1.7 | 0.89 |
|                                                                                                                                                                 | <b>Wealth Index (Thailand)</b> | <b>Hardcore smoker</b> | 3,180,566 Highest                  | <b>1</b>    | OR       |      |
|                                                                                                                                                                 | principal component analysis   |                        | Lowest                             | <b>1.28</b> | 0.92-1.7 | 0.14 |
| No adjustment described                                                                                                                                         |                                |                        | Second                             | <b>1.04</b> | 0.75-1.4 | 0.83 |
| <i>*current daily smoking, no quit attempt in last 12 months or last quit was &lt;24h, no intention to quit in next 12 months or not interested in quitting</i> |                                |                        | Middle                             | <b>1</b>    | 0.75-1.3 | 0.98 |
| <i>first smoke within 30mins of waking, knowledge of harms</i>                                                                                                  |                                |                        | Fourth                             | <b>1.08</b> | 0.8-1.4  | 0.63 |

**Dhungana et al. (2014)** - Source of funding not reported

|                         |                                           |                  |                                             |                                 |              |        |
|-------------------------|-------------------------------------------|------------------|---------------------------------------------|---------------------------------|--------------|--------|
| cross-sectional<br>406  | Rural community in the Sindhuli district. | <b>Caste</b>     | <b>Smoker</b>                               | High (Brahman/Chhetri)          | <b>26.2%</b> | 0.79   |
|                         | Aged 20-50 years                          |                  | Smoking until last 30 days before interview | Middle (Adhibasi/Janajati)      | <b>29.7%</b> |        |
| Nepal                   |                                           |                  |                                             | Low (Dalits)                    | <b>28.6%</b> |        |
|                         |                                           | <b>Education</b> | <b>Smoker</b>                               | Low (no formal education)       | <b>44.7%</b> | <0.001 |
|                         |                                           |                  |                                             | Middle-low (lower than primary) | <b>17.2%</b> |        |
|                         |                                           |                  |                                             | Middle-high (primary)           | <b>8.3%</b>  |        |
|                         |                                           |                  |                                             | High (secondary and higher)     | <b>18.2%</b> |        |
|                         |                                           | <b>SES</b>       | <b>Smoker</b>                               | Lowest                          | <b>42.6%</b> | <0.001 |
|                         | (education, occupation, income)           |                  |                                             | Middle-low                      | <b>27.7%</b> |        |
|                         |                                           |                  |                                             | Middle-high                     | <b>18.8%</b> |        |
| No adjustment described |                                           |                  |                                             | Highest                         | <b>0.0%</b>  |        |

**Bovet et al. (2002)** - Funded by the Swiss National Science Foundation

|                          |                                           |                  |               |            |          |    |
|--------------------------|-------------------------------------------|------------------|---------------|------------|----------|----|
| cross-sectional<br>9,254 | Rural community in the Sindhuli district. | <b>Education</b> | <b>Smoker</b> | Low (none) | <b>1</b> | OR |
|--------------------------|-------------------------------------------|------------------|---------------|------------|----------|----|

|          |                  |                             |                  |                         |             |        |
|----------|------------------|-----------------------------|------------------|-------------------------|-------------|--------|
| Tanzania | Aged 20-50 years |                             | ≥1 cigarette/day | Middle-low (primary)    | <b>0.93</b> | 0.622  |
|          |                  |                             |                  | Middle-high (secondary) | <b>0.53</b> | <0.001 |
|          |                  |                             |                  | High (tertiary)         | <b>0.56</b> | <0.002 |
|          |                  | <b>Wealth (asset score)</b> | <b>Smoker</b>    | Lowest                  | <b>1</b>    | OR     |
|          |                  |                             |                  | Second                  | <b>0.87</b> | 0.131  |
|          |                  |                             |                  | Third                   | <b>0.46</b> | <0.001 |
|          |                  |                             |                  | Fourth                  | <b>0.42</b> | <0.001 |
|          |                  |                             |                  | Fifth                   | <b>0.58</b> | 0.001  |
|          |                  |                             |                  | Highest                 | <b>0.48</b> | <0.001 |

adjusted for age, sex, occupation, wealth

**Minh et al. (2007)** - Funded by the International Network of Demographic Evaluation of Populations (INDEPTH); Swedish Council for Social and Work Life Research

|                                     |                                                                                                  |                                                                   |               |                    |            |         |
|-------------------------------------|--------------------------------------------------------------------------------------------------|-------------------------------------------------------------------|---------------|--------------------|------------|---------|
| cross-sectional<br>1,984<br>Vietnam | Representative 2005 STEPS<br>survey in Bavi district of<br>northern Vietnam.<br>Aged 25-64 years | <b>Education</b>                                                  | <b>Smoker</b> | Low (<7 years)     | <b>0.9</b> | 0.6-1.4 |
|                                     |                                                                                                  |                                                                   |               | Middle (7-9 years) | <b>0.8</b> | 0.6-1.2 |
|                                     |                                                                                                  |                                                                   |               | High (>9 years)    | <b>1</b>   | OR      |
|                                     |                                                                                                  | <b>SES</b><br>(local authority assessment<br>and rice production) | <b>Smoker</b> | low                | <b>2</b>   | 1.2-3.4 |
|                                     |                                                                                                  |                                                                   |               | middle             | <b>1.4</b> | 1.1-2   |
|                                     |                                                                                                  |                                                                   |               | high               | <b>1</b>   | OR      |

adjusted for Sex, Age, Education, Occupation, and Economic Status

**Tonstad et al. (2013)** - Funded by the National Institutes of Health; The Fogarty International Center

|                                      |                                                                                           |                   |                                                                                   |                         |             |           |
|--------------------------------------|-------------------------------------------------------------------------------------------|-------------------|-----------------------------------------------------------------------------------|-------------------------|-------------|-----------|
| cross-sectional<br>5,592<br>Cambodia | Data from smokers identified in<br>the 2006<br>National Tobacco Survey.<br>Aged >18 years | <b>Education</b>  | <b>Quit tobacco</b><br>not used tobacco products for >2 years among<br>ever-users | 4,727 Low (<6 years)    | <b>1</b>    | OR        |
|                                      |                                                                                           |                   |                                                                                   | 840 High (>7 years)     | <b>1.46</b> | 1.01-2.13 |
|                                      |                                                                                           | <b>Income</b>     | <b>Quit tobacco</b>                                                               | 3,919 Low (<US\$1/day)  | <b>1</b>    | OR        |
|                                      |                                                                                           |                   |                                                                                   | 1,673 High (>US\$1/day) | <b>1.39</b> | 1.01-1.91 |
|                                      |                                                                                           | <b>Occupation</b> | <b>Quit tobacco</b>                                                               | 616 None                | <b>1</b>    | OR        |
|                                      |                                                                                           |                   |                                                                                   | 93 Professional         | <b>2.52</b> | 1.27-5.01 |

|                                                               |  |  |  |                       |             |          |
|---------------------------------------------------------------|--|--|--|-----------------------|-------------|----------|
|                                                               |  |  |  | 167 Technical/Service | <b>1.32</b> | 0.7-2.51 |
| adjusted for age, demographics, health status characteristics |  |  |  | 467 Labour            | <b>1.98</b> | 1.1-3.56 |

**Ali et al. (2006)** - Source of funding not reported

|                                          |                                          |                                     |                            |     |                               |            |         |
|------------------------------------------|------------------------------------------|-------------------------------------|----------------------------|-----|-------------------------------|------------|---------|
| cross-sectional<br>411                   | Men from a rural area of Sindh province. | <b>Education</b>                    | <b>Smoker</b>              | 104 | High (>10 years)              | <b>1</b>   | OR      |
| Pakistan                                 | Aged >18 years                           |                                     | has smoked >100 cigarettes | 95  | Medium-high (6-10 years)      | <b>1.1</b> | 0.9-1.6 |
|                                          |                                          |                                     |                            | 92  | Medium-low (1-5 years)        | <b>1.1</b> | 0.9-1.4 |
|                                          |                                          |                                     |                            | 120 | Low (Illiterate)              | <b>1.1</b> | 0.9-1.5 |
|                                          |                                          | <b>Income (average, individual)</b> | <b>Smoker</b>              | 98  | Low (no income)               | <b>1</b>   | OR      |
|                                          |                                          |                                     |                            | 114 | Medium-low (<US\$30/month)    | <b>1.4</b> | 1.0-2.1 |
|                                          |                                          |                                     |                            | 151 | Medium-high (US\$30-60/month) | <b>1.4</b> | 1.0-2.1 |
| adjusted for age, income, marital status |                                          |                                     |                            | 48  | High (>US\$60/month)          | <b>1.7</b> | 1.2-2.6 |

**Hosseinpour et al. (2012)** - Funded by WHO

|                            |                                                                    |                                     |                                    |  |                |         |              |                       |
|----------------------------|--------------------------------------------------------------------|-------------------------------------|------------------------------------|--|----------------|---------|--------------|-----------------------|
| cross-sectional<br>213,807 | Reports data from 48 LMICs taken from the 2003 World Health Survey | <b>SES (men) assets, services</b>   | <b>Smoker</b>                      |  | <b>Georgia</b> | Lowest  | <b>50.1%</b> | Standard Error<br>6   |
| Global                     | Aged >18 years                                                     |                                     | daily or occasional tobacco smoker |  |                | Low     | <b>59.0%</b> | 4.3                   |
|                            |                                                                    |                                     |                                    |  |                | Medium  | <b>58.3%</b> | 3.5                   |
|                            |                                                                    |                                     |                                    |  |                | High    | <b>63.4%</b> | 4                     |
|                            |                                                                    |                                     |                                    |  |                | Highest | <b>67.2%</b> | 2.8                   |
|                            |                                                                    | <b>SES (women) assets, services</b> | <b>Smoker</b>                      |  | <b>Georgia</b> | Lowest  | <b>1.9%</b>  | 1.1                   |
|                            |                                                                    |                                     | daily or occasional tobacco smoker |  |                | Low     | <b>2.4%</b>  | 1.1                   |
|                            |                                                                    |                                     |                                    |  |                | Medium  | <b>4.8%</b>  | 1.8                   |
|                            |                                                                    |                                     |                                    |  |                | High    | <b>8.2%</b>  | 2.5                   |
|                            |                                                                    |                                     |                                    |  |                | Highest | <b>11.6%</b> | 2.6                   |
|                            |                                                                    | <b>SES (men) assets, services</b>   | <b>Smoker</b>                      |  | <b>Morocco</b> | Lowest  | <b>40.3%</b> | Standard Error<br>4.7 |
|                            |                                                                    |                                     | daily or occasional tobacco smoker |  |                | Low     | <b>34.0%</b> | 3.8                   |
|                            |                                                                    |                                     |                                    |  |                | Medium  | <b>38.4%</b> | 5.4                   |

## All High Quality Studies

|                                     |                                    |                    |         |              |                |
|-------------------------------------|------------------------------------|--------------------|---------|--------------|----------------|
|                                     |                                    |                    | High    | <b>31.2%</b> | 4.8            |
|                                     |                                    |                    | Highest | <b>17.5%</b> | 3.5            |
| <b>SES (women) assets, services</b> | <b>Smoker</b>                      | <b>Morocco</b>     | Lowest  | <b>0.0%</b>  | 0              |
|                                     | daily or occasional tobacco smoker |                    | Low     | <b>0.4%</b>  | 0.3            |
|                                     |                                    |                    | Medium  | <b>0.0%</b>  | 0              |
|                                     |                                    |                    | High    | <b>0.3%</b>  | 0.3            |
|                                     |                                    |                    | Highest | <b>0.0%</b>  | 0              |
|                                     |                                    |                    |         |              | Standard Error |
| <b>SES (men) assets, services</b>   | <b>Smoker</b>                      | <b>Paraguay</b>    | Lowest  | <b>62.4%</b> | 2.6            |
|                                     | daily or occasional tobacco smoker |                    | Low     | <b>47.9%</b> | 2.6            |
|                                     |                                    |                    | Medium  | <b>43.8%</b> | 2.8            |
|                                     |                                    |                    | High    | <b>28.4%</b> | 2.5            |
|                                     |                                    |                    | Highest | <b>33.1%</b> | 2.9            |
|                                     |                                    |                    |         |              | Standard Error |
| <b>SES (women) assets, services</b> | <b>Smoker</b>                      | <b>Paraguay</b>    | Lowest  | <b>17.9%</b> | 1.9            |
|                                     | daily or occasional tobacco smoker |                    | Low     | <b>16.3%</b> | 1.9            |
|                                     |                                    |                    | Medium  | <b>14.3%</b> | 1.8            |
|                                     |                                    |                    | High    | <b>9.7%</b>  | 1.3            |
|                                     |                                    |                    | Highest | <b>12.2%</b> | 1.5            |
|                                     |                                    |                    |         |              | Standard Error |
| <b>SES (men) assets, services</b>   | <b>Smoker</b>                      | <b>Phillipines</b> | Lowest  | <b>67.9%</b> | 2.22           |
|                                     | daily or occasional tobacco smoker |                    | Low     | <b>60.6%</b> | 2.4            |
|                                     |                                    |                    | Medium  | <b>57.3%</b> | 2.2            |
|                                     |                                    |                    | High    | <b>55.6%</b> | 2.2            |
|                                     |                                    |                    | Highest | <b>50.2%</b> | 2.3            |
|                                     |                                    |                    |         |              | Standard Error |
| <b>SES (women) assets, services</b> | <b>Smoker</b>                      | <b>Phillipines</b> | Lowest  | <b>17.2%</b> | 1.7            |
|                                     | daily or occasional tobacco smoker |                    | Low     | <b>14.4%</b> | 1.4            |
|                                     |                                    |                    | Medium  | <b>12.1%</b> | 1.2            |
|                                     |                                    |                    | High    | <b>12.1%</b> | 1.3            |
|                                     |                                    |                    | Highest | <b>8.8%</b>  | 1.3            |
|                                     |                                    |                    |         |              | Standard Error |

## All High Quality Studies

|                                     |                                                     |                  |         |              |                |
|-------------------------------------|-----------------------------------------------------|------------------|---------|--------------|----------------|
| <b>SES (men) assets, services</b>   | <b>Smoker</b><br>daily or occasional tobacco smoker | <b>Sri Lanka</b> | Lowest  | <b>56.1%</b> | 4.5            |
|                                     |                                                     |                  | Low     | <b>49.5%</b> | 3.6            |
|                                     |                                                     |                  | Medium  | <b>45.5%</b> | 3.1            |
|                                     |                                                     |                  | High    | <b>38.0%</b> | 2.3            |
|                                     |                                                     |                  | Highest | <b>29.9%</b> | 3.9            |
| <b>SES (women) assets, services</b> | <b>Smoker</b><br>daily or occasional tobacco smoker | <b>Sri Lanka</b> | Lowest  | <b>6.4%</b>  | 1.9            |
|                                     |                                                     |                  | Low     | <b>4.7%</b>  | 1.5            |
|                                     |                                                     |                  | Medium  | <b>3.0%</b>  | 1              |
|                                     |                                                     |                  | High    | <b>1.7%</b>  | 0.6            |
|                                     |                                                     |                  | Highest | <b>2.4%</b>  | 1              |
|                                     |                                                     |                  |         |              | Standard Error |
| <b>SES (men) assets, services</b>   | <b>Smoker</b><br>daily or occasional tobacco smoker | <b>Swaziland</b> | Lowest  | <b>19.9%</b> | 6.4            |
|                                     |                                                     |                  | Low     | <b>10.7%</b> | 2.8            |
|                                     |                                                     |                  | Medium  | <b>14.8%</b> | 5.4            |
|                                     |                                                     |                  | High    | <b>14.3%</b> | 5.2            |
|                                     |                                                     |                  | Highest | <b>16.5%</b> | 3.9            |
| <b>SES (women) assets, services</b> | <b>Smoker</b><br>daily or occasional tobacco smoker | <b>Swaziland</b> | Lowest  | <b>8.8%</b>  | 3.4            |
|                                     |                                                     |                  | Low     | <b>1.7%</b>  | 0.9            |
|                                     |                                                     |                  | Medium  | <b>0.2%</b>  | 0.2            |
|                                     |                                                     |                  | High    | <b>4.1%</b>  | 1.6            |
|                                     |                                                     |                  | Highest | <b>2.3%</b>  | 2.3            |
|                                     |                                                     |                  |         |              | Standard Error |
| <b>SES (men) assets, services</b>   | <b>Smoker</b><br>daily or occasional tobacco smoker | <b>Ukraine</b>   | Lowest  | <b>55.3%</b> | 6              |
|                                     |                                                     |                  | Low     | <b>48.8%</b> | 4.5            |
|                                     |                                                     |                  | Medium  | <b>53.8%</b> | 4.4            |
|                                     |                                                     |                  | High    | <b>57.9%</b> | 4              |
|                                     |                                                     |                  | Highest | <b>54.9%</b> | 4.3            |
| <b>SES (women) assets, services</b> | <b>Smoker</b><br>daily or occasional tobacco smoker | <b>Ukraine</b>   | Lowest  | <b>7.7%</b>  | 1.8            |
|                                     |                                                     |                  | Low     | <b>6.1%</b>  | 1.4            |
|                                     |                                                     |                  | Medium  | <b>12.0%</b> | 2.3            |

## All High Quality Studies

|                              |                                              |              |         |       |                |
|------------------------------|----------------------------------------------|--------------|---------|-------|----------------|
|                              |                                              |              | High    | 13.2% | 3              |
|                              |                                              |              | Highest | 14.0% | 2.2            |
|                              |                                              |              |         |       | Standard Error |
| SES (men) assets, services   | Smoker<br>daily or occasional tobacco smoker | Bangladesh   | Lowest  | 72.2% | 2.9            |
|                              |                                              |              | Low     | 4.1%  | 2.9            |
|                              |                                              |              | Medium  | 57.6% | 2.8            |
|                              |                                              |              | High    | 48.6% | 2.7            |
|                              |                                              |              | Highest | 44.2% | 2.6            |
|                              |                                              |              |         |       |                |
| SES (women) assets, services | Smoker<br>daily or occasional tobacco smoker | Bangladesh   | Lowest  | 8.2%  | 1.5            |
|                              |                                              |              | Low     | 6.0%  | 1.2            |
|                              |                                              |              | Medium  | 8.3%  | 1.5            |
|                              |                                              |              | High    | 5.9%  | 1.6            |
|                              |                                              |              |         |       | Standard Error |
| SES (men) assets, services   | Smoker<br>daily or occasional tobacco smoker | Burkina Faso | Lowest  | 29.9% | 3.4            |
|                              |                                              |              | Low     | 25.8% | 2.8            |
|                              |                                              |              | Medium  | 21.6% | 2.5            |
|                              |                                              |              | High    | 17.5% | 2.5            |
|                              |                                              |              | Highest | 26.2% | 3.5            |
| SES (women) assets, services | Smoker<br>daily or occasional tobacco smoker | Burkina Faso | Lowest  | 12.6% | 2.4            |
|                              |                                              |              | Low     | 14.1% | 2.4            |
|                              |                                              |              | Medium  | 10.9% | 2.1            |
|                              |                                              |              | High    | 10.5% | 2.2            |
|                              |                                              |              | Highest | 8.2%  | 2.9            |
|                              |                                              |              |         |       | Standard Error |
| SES (men) assets, services   | Smoker<br>daily or occasional tobacco smoker | Chad         | Lowest  | 22.8% | 4              |
|                              |                                              |              | Low     | 19.9% | 3.2            |
|                              |                                              |              | Medium  | 19.3% | 3.2            |
|                              |                                              |              | High    | 18.2% | 2.3            |
|                              |                                              |              | Highest | 14.8% | 2              |
| SES (women) assets, services | Smoker                                       | Chad         | Lowest  | 1.6%  | 0.7            |

## All High Quality Studies

|                                     |                                    |                      |         |              |                |
|-------------------------------------|------------------------------------|----------------------|---------|--------------|----------------|
|                                     | daily or occasional tobacco smoker |                      | Low     | <b>5.1%</b>  | 2              |
|                                     |                                    |                      | Medium  | <b>2.7%</b>  | 1.1            |
|                                     |                                    |                      | High    | <b>3.8%</b>  | 2              |
|                                     |                                    |                      | Highest | <b>3.6%</b>  | 1.2            |
|                                     |                                    |                      |         |              | Standard Error |
| <b>SES (men) assets, services</b>   | <b>Smoker</b>                      | <b>Comoros</b>       | Lowest  | <b>39.0%</b> | 8              |
|                                     | daily or occasional tobacco smoker |                      | Low     | <b>37.9%</b> | 6.5            |
|                                     |                                    |                      | Medium  | <b>31.6%</b> | 4.6            |
|                                     |                                    |                      | High    | <b>39.5%</b> | 6              |
|                                     |                                    |                      | Highest | <b>32.4%</b> | 5.5            |
| <b>SES (women) assets, services</b> | <b>Smoker</b>                      | <b>Comoros</b>       | Lowest  | <b>38.3%</b> | 8.7            |
|                                     | daily or occasional tobacco smoker |                      | Low     | <b>14.7%</b> | 5.5            |
|                                     |                                    |                      | Medium  | <b>21.1%</b> | 6.8            |
|                                     |                                    |                      | High    | <b>16.3%</b> | 5.9            |
|                                     |                                    |                      | Highest | <b>20.2%</b> | 8.7            |
|                                     |                                    |                      |         |              | Standard Error |
| <b>SES (men) assets, services</b>   | <b>Smoker</b>                      | <b>Congo</b>         | Lowest  | <b>31.2%</b> | 5.8            |
|                                     | daily or occasional tobacco smoker |                      | Low     | <b>28.6%</b> | 4.8            |
|                                     |                                    |                      | Medium  | <b>17.7%</b> | 4.5            |
|                                     |                                    |                      | High    | <b>10.7%</b> | 3.4            |
|                                     |                                    |                      | Highest | <b>9.9%</b>  | 4.2            |
| <b>SES (women) assets, services</b> | <b>Smoker</b>                      | <b>Congo</b>         | Lowest  | <b>4.9%</b>  | 2.5            |
|                                     | daily or occasional tobacco smoker |                      | Low     | <b>0.9%</b>  | 0.5            |
|                                     |                                    |                      | Medium  | <b>2.9%</b>  | 1.8            |
|                                     |                                    |                      | High    | <b>1.4%</b>  | 0.7            |
|                                     |                                    |                      | Highest | <b>0.3%</b>  | 0.3            |
|                                     |                                    |                      |         |              | Standard Error |
| <b>SES (men) assets, services</b>   | <b>Smoker</b>                      | <b>Cote d'Ivoire</b> | Lowest  | <b>28.0%</b> | 3              |
|                                     | daily or occasional tobacco smoker |                      | Low     | <b>21.3%</b> | 2.8            |
|                                     |                                    |                      | Medium  | <b>22.0%</b> | 2.8            |
|                                     |                                    |                      | High    | <b>19.5%</b> | 2.8            |



## All High Quality Studies

|                                     |                                    |                      |         |              |                |
|-------------------------------------|------------------------------------|----------------------|---------|--------------|----------------|
|                                     |                                    |                      | Highest | <b>18.0%</b> | 33.1           |
| <b>SES (women) assets, services</b> | <b>Smoker</b>                      | <b>Cote d'Ivoire</b> | Lowest  | <b>3.4%</b>  | 1.6            |
|                                     | daily or occasional tobacco smoker |                      | Low     | <b>5.1%</b>  | 1.8            |
|                                     |                                    |                      | Medium  | <b>3.9%</b>  | 1.3            |
|                                     |                                    |                      | High    | <b>1.8%</b>  | 0.8            |
|                                     |                                    |                      | Highest | <b>1.1%</b>  | 0.6            |
|                                     |                                    |                      |         |              | Standard Error |
| <b>SES (men) assets, services</b>   | <b>Smoker</b>                      | <b>Ethiopia</b>      | Lowest  | <b>5.3%</b>  | 2              |
|                                     | daily or occasional tobacco smoker |                      | Low     | <b>9.5%</b>  | 2.2            |
|                                     |                                    |                      | Medium  | <b>8.1%</b>  | 1.8            |
|                                     |                                    |                      | High    | <b>8.8%</b>  | 4.8            |
|                                     |                                    |                      | Highest | <b>4.8%</b>  | 1.2            |
| <b>SES (women) assets, services</b> | <b>Smoker</b>                      | <b>Ethiopia</b>      | Lowest  | <b>0.4%</b>  | 0.4            |
|                                     | daily or occasional tobacco smoker |                      | Low     | <b>1.2%</b>  | 0.6            |
|                                     |                                    |                      | Medium  | <b>0.7%</b>  | 0.4            |
|                                     |                                    |                      | High    | <b>0.6%</b>  | 0.4            |
|                                     |                                    |                      | Highest | <b>0.1%</b>  | 0.1            |
|                                     |                                    |                      |         |              | Standard Error |
| <b>SES (men) assets, services</b>   | <b>Smoker</b>                      | <b>Ghana</b>         | Lowest  | <b>21.5%</b> | 3              |
|                                     | daily or occasional tobacco smoker |                      | Low     | <b>12.7%</b> | 1.9            |
|                                     |                                    |                      | Medium  | <b>9.6%</b>  | 1.8            |
|                                     |                                    |                      | High    | <b>6.1%</b>  | 1.3            |
|                                     |                                    |                      | Highest | <b>8.4%</b>  | 1.8            |
| <b>SES (women) assets, services</b> | <b>Smoker</b>                      | <b>Ghana</b>         | Lowest  | <b>2.6%</b>  | 0.7            |
|                                     | daily or occasional tobacco smoker |                      | Low     | <b>1.4%</b>  | 0.7            |
|                                     |                                    |                      | Medium  | <b>0.9%</b>  | 0.7            |
|                                     |                                    |                      | High    | <b>0.7%</b>  | 0.4            |
|                                     |                                    |                      | Highest | <b>1.3%</b>  | 0.5            |
|                                     |                                    |                      |         |              | Standard Error |
| <b>SES (men) assets, services</b>   | <b>Smoker</b>                      | <b>India</b>         | Lowest  | <b>46.7%</b> | 3.2            |

## All High Quality Studies

|                                     |                                    |                     |         |              |                |
|-------------------------------------|------------------------------------|---------------------|---------|--------------|----------------|
|                                     | daily or occasional tobacco smoker |                     | Low     | <b>45.8%</b> | 2.9            |
|                                     |                                    |                     | Medium  | <b>37.8%</b> | 3.8            |
|                                     |                                    |                     | High    | <b>23.5%</b> | 2.9            |
|                                     |                                    |                     | Highest | <b>21.8%</b> | 3.1            |
| <b>SES (women) assets, services</b> | <b>Smoker</b>                      | <b>India</b>        | Lowest  | <b>12.4%</b> | 3.7            |
|                                     | daily or occasional tobacco smoker |                     | Low     | <b>8.6%</b>  | 1.8            |
|                                     |                                    |                     | Medium  | <b>8.4%</b>  | 1.7            |
|                                     |                                    |                     | High    | <b>4.3%</b>  | 1.1            |
|                                     |                                    |                     | Highest | <b>3.1%</b>  | 1              |
|                                     |                                    |                     |         |              | Standard Error |
| <b>SES (men) assets, services</b>   | <b>Smoker</b>                      | <b>Kenya</b>        | Lowest  | <b>33.1%</b> | 5.4            |
|                                     | daily or occasional tobacco smoker |                     | Low     | <b>26.9%</b> | 4              |
|                                     |                                    |                     | Medium  | <b>25.2%</b> | 3.9            |
|                                     |                                    |                     | High    | <b>25.6%</b> | 4              |
|                                     |                                    |                     | Highest | <b>26.7%</b> | 5.5            |
| <b>SES (women) assets, services</b> | <b>Smoker</b>                      | <b>Kenya</b>        | Lowest  | <b>3.2%</b>  | 0.9            |
|                                     | daily or occasional tobacco smoker |                     | Low     | <b>3.3%</b>  | 1              |
|                                     |                                    |                     | Medium  | <b>3.8%</b>  | 2.3            |
|                                     |                                    |                     | High    | <b>0.8%</b>  | 0.4            |
|                                     |                                    |                     | Highest | <b>0.2%</b>  | 0.2            |
|                                     |                                    |                     |         |              | Standard Error |
| <b>SES (men) assets, services</b>   | <b>Smoker</b>                      | <b>Lao People's</b> | Lowest  | <b>77.1%</b> | 2.9            |
|                                     | daily or occasional tobacco smoker |                     | Low     | <b>72.7%</b> | 2.7            |
|                                     |                                    |                     | Medium  | <b>61.0%</b> | 3.2            |
|                                     |                                    |                     | High    | <b>62.7%</b> | 2.9            |
|                                     |                                    |                     | Highest | <b>41.5%</b> | 2.8            |
| <b>SES (women) assets, services</b> | <b>Smoker</b>                      | <b>Lao People's</b> | Lowest  | <b>28.3%</b> | 3.6            |
|                                     | daily or occasional tobacco smoker |                     | Low     | <b>17.8%</b> | 2.4            |
|                                     |                                    |                     | Medium  | <b>12.7%</b> | 2.1            |

## All High Quality Studies

|                              |                                              |            |         |       |                |
|------------------------------|----------------------------------------------|------------|---------|-------|----------------|
|                              |                                              |            | High    | 5.0%  | 1.3            |
|                              |                                              |            | Highest | 1.8%  | 0.8            |
|                              |                                              |            |         |       | Standard Error |
| SES (men) assets, services   | Smoker<br>daily or occasional tobacco smoker | Malawi     | Lowest  | 40.9% | 3.2            |
|                              |                                              |            | Low     | 34.9% | 2.7            |
|                              |                                              |            | Medium  | 24.0% | 3.3            |
|                              |                                              |            | High    | 15.9% | 2.4            |
|                              |                                              |            | Highest | 13.3% | 2.7            |
|                              |                                              |            |         |       |                |
| SES (women) assets, services | Smoker<br>daily or occasional tobacco smoker | Malawi     | Lowest  | 9.5%  | 1.5            |
|                              |                                              |            | Low     | 7.5%  | 1.6            |
|                              |                                              |            | Medium  | 6.8%  | 1.5            |
|                              |                                              |            | High    | 3.5%  | 1.1            |
|                              |                                              |            | Highest | 0.7%  | 0.5            |
|                              |                                              |            |         |       |                |
| SES (men) assets, services   | Smoker<br>daily or occasional tobacco smoker | Mali       | Lowest  | 27.3% | 3.2            |
|                              |                                              |            | Low     | 28.2% | 3.2            |
|                              |                                              |            | Medium  | 24.7% | 2.7            |
|                              |                                              |            | High    | 24.2% | 2.5            |
|                              |                                              |            | Highest | 25.9% | 3.1            |
|                              |                                              |            |         |       |                |
| SES (women) assets, services | Smoker<br>daily or occasional tobacco smoker | Mali       | Lowest  | 4.0%  | 1.6            |
|                              |                                              |            | Low     | 3.8%  | 1.6            |
|                              |                                              |            | Medium  | 3.5%  | 1.3            |
|                              |                                              |            | High    | 2.9%  | 1.1            |
|                              |                                              |            | Highest | 0.5%  | 0.5            |
|                              |                                              |            |         |       |                |
| SES (men) assets, services   | Smoker<br>daily or occasional tobacco smoker | Mauritania | Lowest  | 27.8% | 4.3            |
|                              |                                              |            | Low     | 22.3% | 4.3            |
|                              |                                              |            | Medium  | 23.4% | 4              |
|                              |                                              |            | High    | 30.6% | 4.2            |
|                              |                                              |            | Highest | 38.6% | 4              |
|                              |                                              |            |         |       |                |

## All High Quality Studies

|                                     |                                                     |                   |         |              |                |
|-------------------------------------|-----------------------------------------------------|-------------------|---------|--------------|----------------|
| <b>SES (women) assets, services</b> | <b>Smoker</b><br>daily or occasional tobacco smoker | <b>Mauritania</b> | Lowest  | <b>2.8%</b>  | 1.1            |
|                                     |                                                     |                   | Low     | <b>1.6%</b>  | 0.8            |
|                                     |                                                     |                   | Medium  | <b>5.6%</b>  | 2.2            |
|                                     |                                                     |                   | High    | <b>7.2%</b>  | 1.8            |
|                                     |                                                     |                   | Highest | <b>5.8%</b>  | 1.5            |
|                                     |                                                     |                   |         |              | Standard Error |
| <b>SES (men) assets, services</b>   | <b>Smoker</b><br>daily or occasional tobacco smoker | <b>Myanmar</b>    | Lowest  | <b>52.5%</b> | 3.9            |
|                                     |                                                     |                   | Low     | <b>53.7%</b> | 3.2            |
|                                     |                                                     |                   | Medium  | <b>46.0%</b> | 2.8            |
|                                     |                                                     |                   | High    | <b>48.4%</b> | 2.5            |
|                                     |                                                     |                   | Highest | <b>40.3%</b> | 2.5            |
|                                     |                                                     |                   |         |              | Standard Error |
| <b>SES (women) assets, services</b> | <b>Smoker</b><br>daily or occasional tobacco smoker | <b>Myanmar</b>    | Lowest  | <b>21.8%</b> | 2.5            |
|                                     |                                                     |                   | Low     | <b>18.2%</b> | 2.3            |
|                                     |                                                     |                   | Medium  | <b>12.5%</b> | 1.5            |
|                                     |                                                     |                   | High    | <b>8.5%</b>  | 1.1            |
|                                     |                                                     |                   | Highest | <b>4.6%</b>  | 1              |
|                                     |                                                     |                   |         |              | Standard Error |
| <b>SES (men) assets, services</b>   | <b>Smoker</b><br>daily or occasional tobacco smoker | <b>Nepal</b>      | Lowest  | <b>43.7%</b> | 2.6            |
|                                     |                                                     |                   | Low     | <b>36.8%</b> | 2.5            |
|                                     |                                                     |                   | Medium  | <b>36.0%</b> | 2.2            |
|                                     |                                                     |                   | High    | <b>30.4%</b> | 2.2            |
|                                     |                                                     |                   | Highest | <b>26.0%</b> | 2              |
|                                     |                                                     |                   |         |              | Standard Error |
| <b>SES (women) assets, services</b> | <b>Smoker</b><br>daily or occasional tobacco smoker | <b>Nepal</b>      | Lowest  | <b>28.5%</b> | 2.1            |
|                                     |                                                     |                   | Low     | <b>25.6%</b> | 2              |
|                                     |                                                     |                   | Medium  | <b>18.7%</b> | 1.5            |
|                                     |                                                     |                   | High    | <b>17.9%</b> | 1.8            |
|                                     |                                                     |                   | Highest | <b>9.7%</b>  | 1.3            |
|                                     |                                                     |                   |         |              | Standard Error |
| <b>SES (men) assets, services</b>   | <b>Smoker</b><br>daily or occasional tobacco smoker | <b>Pakistan</b>   | Lowest  | <b>40.5%</b> | 2.5            |
|                                     |                                                     |                   | Low     | <b>35.4%</b> | 2.5            |
|                                     |                                                     |                   | Medium  | <b>35.6%</b> | 2.7            |

## All High Quality Studies

|                                     |                                    |                 |         |              |                |
|-------------------------------------|------------------------------------|-----------------|---------|--------------|----------------|
|                                     |                                    |                 | High    | <b>32.0%</b> | 2.6            |
|                                     |                                    |                 | Highest | <b>19.1%</b> | 2.1            |
| <b>SES (women) assets, services</b> | <b>Smoker</b>                      | <b>Pakistan</b> | Lowest  | <b>7.4%</b>  | 1.5            |
|                                     | daily or occasional tobacco smoker |                 | Low     | <b>6.8%</b>  | 1.3            |
|                                     |                                    |                 | Medium  | <b>7.4%</b>  | 1.8            |
|                                     |                                    |                 | High    | <b>6.3%</b>  | 1.6            |
|                                     |                                    |                 | Highest | <b>3.8%</b>  | 1.2            |
|                                     |                                    |                 |         |              | Standard Error |
| <b>SES (men) assets, services</b>   | <b>Smoker</b>                      | <b>Senegal</b>  | Lowest  | <b>28.9%</b> | 4.6            |
|                                     | daily or occasional tobacco smoker |                 | Low     | <b>25.5%</b> | 4.7            |
|                                     |                                    |                 | Medium  | <b>24.4%</b> | 4              |
|                                     |                                    |                 | High    | <b>21.2%</b> | 4.1            |
|                                     |                                    |                 | Highest | <b>26.3%</b> | 3.8            |
| <b>SES (women) assets, services</b> | <b>Smoker</b>                      | <b>Senegal</b>  | Lowest  | <b>4.7%</b>  | 2              |
|                                     | daily or occasional tobacco smoker |                 | Low     | <b>0.0%</b>  | 0              |
|                                     |                                    |                 | Medium  | <b>0.4%</b>  | 0.4            |
|                                     |                                    |                 | High    | <b>0.5%</b>  | 0.4            |
|                                     |                                    |                 | Highest | <b>1.9%</b>  | 1.4            |
|                                     |                                    |                 |         |              | Standard Error |
| <b>SES (men) assets, services</b>   | <b>Smoker</b>                      | <b>Vietnam</b>  | Lowest  | <b>66.9%</b> | 3.5            |
|                                     | daily or occasional tobacco smoker |                 | Low     | <b>59.8%</b> | 4.3            |
|                                     |                                    |                 | Medium  | <b>43.0%</b> | 5.6            |
|                                     |                                    |                 | High    | <b>45.0%</b> | 4.2            |
|                                     |                                    |                 | Highest | <b>46.7%</b> | 4.7            |
| <b>SES (women) assets, services</b> | <b>Smoker</b>                      | <b>Vietnam</b>  | Lowest  | <b>3.2%</b>  | 1.2            |
|                                     | daily or occasional tobacco smoker |                 | Low     | <b>2.1%</b>  | 0.8            |
|                                     |                                    |                 | Medium  | <b>2.2%</b>  | 0.8            |
|                                     |                                    |                 | High    | <b>3.4%</b>  | 1.4            |
|                                     |                                    |                 | Highest | <b>1.8%</b>  | 1.2            |
|                                     |                                    |                 |         |              | Standard Error |

## All High Quality Studies

|                                     |                                                     |                 |         |              |     |
|-------------------------------------|-----------------------------------------------------|-----------------|---------|--------------|-----|
| <b>SES (men) assets, services</b>   | <b>Smoker</b><br>daily or occasional tobacco smoker | <b>Zambia</b>   | Lowest  | <b>36.8%</b> | 3.5 |
|                                     |                                                     |                 | Low     | <b>27.5%</b> | 2.6 |
|                                     |                                                     |                 | Medium  | <b>21.5%</b> | 2.5 |
|                                     |                                                     |                 | High    | <b>22.9%</b> | 2.7 |
|                                     |                                                     |                 | Highest | <b>13.0%</b> | 2.1 |
| <b>SES (women) assets, services</b> | <b>Smoker</b><br>daily or occasional tobacco smoker | <b>Zambia</b>   | Lowest  | <b>11.5%</b> | 1.6 |
|                                     |                                                     |                 | Low     | <b>7.9%</b>  | 2.3 |
|                                     |                                                     |                 | Medium  | <b>2.6%</b>  | 1   |
|                                     |                                                     |                 | High    | <b>3.4%</b>  | 1.2 |
|                                     |                                                     |                 | Highest | <b>3.9%</b>  | 1.5 |
| Standard Error                      |                                                     |                 |         |              |     |
| <b>SES (men) assets, services</b>   | <b>Smoker</b><br>daily or occasional tobacco smoker | <b>Zimbabwe</b> | Lowest  | <b>37.3%</b> | 4.5 |
|                                     |                                                     |                 | Low     | <b>29.6%</b> | 3.9 |
|                                     |                                                     |                 | Medium  | <b>26.4%</b> | 3.7 |
|                                     |                                                     |                 | High    | <b>20.0%</b> | 2.8 |
|                                     |                                                     |                 | Highest | <b>23.5%</b> | 2.8 |
| <b>SES (women) assets, services</b> | <b>Smoker</b><br>daily or occasional tobacco smoker | <b>Zimbabwe</b> | Lowest  | <b>6.4%</b>  | 2   |
|                                     |                                                     |                 | Low     | <b>3.6%</b>  | 1   |
|                                     |                                                     |                 | Medium  | <b>3.1%</b>  | 0.8 |
|                                     |                                                     |                 | High    | <b>1.9%</b>  | 0.7 |
|                                     |                                                     |                 | Highest | <b>1.7%</b>  | 0.8 |
| No adjustment described             |                                                     |                 |         |              |     |

| Design, n                                                                                | Quality  | Sample                                                                                                                       | Exposure                                  | Outcome                                                  | n     | Exposure subgroup            | Value        | 95% CI    | p |
|------------------------------------------------------------------------------------------|----------|------------------------------------------------------------------------------------------------------------------------------|-------------------------------------------|----------------------------------------------------------|-------|------------------------------|--------------|-----------|---|
| Non peer-reviewed                                                                        |          |                                                                                                                              |                                           |                                                          |       |                              |              |           |   |
| <b>WHO STEPS Eritrea (2004)</b> - Funded by WHO, Italian Government, Eritrean Government |          |                                                                                                                              |                                           |                                                          |       |                              |              |           |   |
| cross-sectional<br>2,033<br>Eritrea                                                      | moderate | Nationally representative<br>sample, individuals<br>selected from six zones.<br>Aged 15-64 years                             | <b>Education</b>                          | <b>Alcohol use</b>                                       | 697   | Lowest (no formal education) | <b>36.4%</b> |           |   |
|                                                                                          |          |                                                                                                                              |                                           |                                                          | 631   | Low (Grades 1-6)             | <b>37.9%</b> |           |   |
|                                                                                          |          |                                                                                                                              |                                           |                                                          | 247   | Middle (Grade 7-8)           | <b>44.5%</b> |           |   |
|                                                                                          |          |                                                                                                                              |                                           |                                                          | 386   | High (Grades 9-12)           | <b>44.8%</b> |           |   |
|                                                                                          |          |                                                                                                                              |                                           |                                                          | 90    | Highest (>12 years)          | <b>40.0%</b> |           |   |
|                                                                                          |          |                                                                                                                              |                                           |                                                          |       | No adjustment described      |              |           |   |
| <b>WHO STEPS Togo (2010)</b> - Source of funding not reported                            |          |                                                                                                                              |                                           |                                                          |       |                              |              |           |   |
| cross-sectional<br>4,370<br>Togo                                                         | moderate | Nationally representative<br>STEPS survey. Residents from 6<br>zones who have lived there for >6<br>months. Aged 15-64 years | <b>Education</b>                          | <b>Harmful alcohol use</b>                               | 939   | No formal education          | <b>4.3%</b>  | 2.7-5.9   |   |
|                                                                                          |          |                                                                                                                              |                                           | ≥60 g of pure alcohol/day for<br>men, ≥40g/day for women | 503   | Primary                      | <b>2.3%</b>  | 0.8-3.8   |   |
|                                                                                          |          |                                                                                                                              |                                           |                                                          | 430   | Secondary                    | <b>3.3%</b>  | 1.3-5.4   |   |
|                                                                                          |          |                                                                                                                              |                                           |                                                          | 276   | College or equivalent        | <b>2.9%</b>  | 0.8-5.1   |   |
|                                                                                          |          |                                                                                                                              |                                           |                                                          | 73    | High school                  | <b>3.2%</b>  | 0-7.2     |   |
|                                                                                          |          |                                                                                                                              |                                           |                                                          | 55    | University                   | <b>0.0%</b>  | 0-0       |   |
|                                                                                          |          |                                                                                                                              |                                           |                                                          |       | No adjustment described      |              |           |   |
| <b>WHO STEPS Zambia (2008)</b> - Funded by Zambian Ministry of Health; WHO               |          |                                                                                                                              |                                           |                                                          |       |                              |              |           |   |
| cross-sectional<br>1,928<br>Zambia                                                       | moderate | WHO STEPS survey in Lusaka district,<br>67% female.<br>Aged >25 years                                                        | <b>Education</b>                          | <b>Alcohol consumption</b>                               |       | No formal education          | <b>1</b>     | OR        |   |
|                                                                                          |          |                                                                                                                              |                                           |                                                          |       | Primary completed            | <b>1.51</b>  | 0.69-3.3  |   |
|                                                                                          |          |                                                                                                                              |                                           |                                                          |       | Secondary completed          | <b>1.74</b>  | 0.92-3.3  |   |
|                                                                                          |          |                                                                                                                              |                                           |                                                          |       | College or higher completed  | <b>1.67</b>  | 0.86-3.23 |   |
|                                                                                          |          |                                                                                                                              |                                           |                                                          |       | No adjustment described      |              |           |   |
| <b>WHO STEPS India (2007)</b> - Funded by World Bank, Indian Government                  |          |                                                                                                                              |                                           |                                                          |       |                              |              |           |   |
| cross-sectional<br>38,064<br>India                                                       | moderate | WHO STEPS survey in seven<br>states. Aged 15-64                                                                              | <b>Education</b><br><b>Andhra Pradesh</b> | <b>Alcohol use</b><br>any in last 12 months              | 6,218 | Illiterate                   | <b>20.3%</b> |           |   |
|                                                                                          |          |                                                                                                                              |                                           |                                                          |       | Primary                      | <b>24.6%</b> |           |   |
|                                                                                          |          |                                                                                                                              |                                           |                                                          |       | Middle                       | <b>20.0%</b> |           |   |
|                                                                                          |          |                                                                                                                              |                                           |                                                          |       | Secondary                    | <b>18.3%</b> |           |   |
|                                                                                          |          |                                                                                                                              |                                           |                                                          |       | Higher Secondary             | <b>17.6%</b> |           |   |
|                                                                                          |          |                                                                                                                              |                                           |                                                          |       | College and above            | <b>16.1%</b> |           |   |
|                                                                                          |          |                                                                                                                              | <b>Education</b><br><b>Madhya Pradesh</b> | <b>Alcohol use</b><br>any in last 12 months              | 5,853 | Illiterate                   | <b>20.5%</b> |           |   |
|                                                                                          |          |                                                                                                                              |                                           |                                                          |       | Primary                      | <b>26.6%</b> |           |   |
|                                                                                          |          |                                                                                                                              |                                           |                                                          |       | Middle                       | <b>19.0%</b> |           |   |
|                                                                                          |          |                                                                                                                              |                                           |                                                          |       | Secondary                    | <b>14.0%</b> |           |   |
|                                                                                          |          |                                                                                                                              |                                           |                                                          |       | Higher Secondary             | <b>14.7%</b> |           |   |

## Alcohol

|                                  |                                              |       |                         |       |
|----------------------------------|----------------------------------------------|-------|-------------------------|-------|
|                                  |                                              |       | College and above       | 11.9% |
| <b>Education<br/>Maharashtra</b> | <b>Alcohol use<br/>any in last 12 months</b> | 6,091 | Illiterate              | 19.9% |
|                                  |                                              |       | Primary                 | 18.9% |
|                                  |                                              |       | Middle                  | 12.6% |
|                                  |                                              |       | Secondary               | 11.3% |
|                                  |                                              |       | Higher Secondary        | 11.8% |
|                                  |                                              |       | College and above       | 12.0% |
| <b>Education<br/>Mizoram</b>     | <b>Alcohol use<br/>any in last 12 months</b> | 4,495 | Illiterate              | 14.8% |
|                                  |                                              |       | Primary                 | 8.2%  |
|                                  |                                              |       | Middle                  | 1.3%  |
|                                  |                                              |       | Secondary               | 12.2% |
|                                  |                                              |       | Higher Secondary        | 10.8% |
|                                  |                                              |       | College and above       | 9.4%  |
| <b>Education<br/>Kerala</b>      | <b>Alcohol use<br/>any in last 12 months</b> | 4,859 | Illiterate              | 14.5% |
|                                  |                                              |       | Primary                 | 21.6% |
|                                  |                                              |       | Middle                  | 23.4% |
|                                  |                                              |       | Secondary               | 19.7% |
|                                  |                                              |       | Higher Secondary        | 11.2% |
|                                  |                                              |       | College and above       | 13.8% |
| <b>Education<br/>Tamil Nadu</b>  | <b>Alcohol use<br/>any in last 12 months</b> | 5,105 | Illiterate              | 15.3% |
|                                  |                                              |       | Primary                 | 19.9% |
|                                  |                                              |       | Middle                  | 17.7% |
|                                  |                                              |       | Secondary               | 14.8% |
|                                  |                                              |       | Higher Secondary        | 7.0%  |
|                                  |                                              |       | College and above       | 11.2% |
| <b>Education<br/>Uttarakhand</b> | <b>Alcohol use<br/>any in last 12 months</b> | 5,443 | Illiterate              | 10.9% |
|                                  |                                              |       | Primary                 | 20.2% |
|                                  |                                              |       | Middle                  | 17.5% |
|                                  |                                              |       | Secondary               | 19.6% |
|                                  |                                              |       | Higher Secondary        | 13.9% |
|                                  |                                              |       | College and above       | 18.1% |
|                                  |                                              |       | No adjustment described |       |

Peer-reviewed

Bonu et al. (2005) - Source of funding not reported



|                           |      |                                                                                       |                                    |                                                                       |              |            |           |       |
|---------------------------|------|---------------------------------------------------------------------------------------|------------------------------------|-----------------------------------------------------------------------|--------------|------------|-----------|-------|
| cross-sectional<br>22,685 | high | Hospitalised participants of the 1995/6 Indian National Sample Survey. Aged >10 years | <b>Current regular alcohol use</b> | <b>Poverty</b><br>borrowing/financial distress during hospitalisation | Non-user     | <b>1</b>   | OR        |       |
| India                     |      |                                                                                       |                                    |                                                                       | Alcohol user | <b>1.1</b> | 0.64-1.86 | >0.05 |

adjusted for head of household, age, sex, level of schooling, marital status, state. number of days of hospitalisation used to control for severity of illness

**Kar et al. (2010)** - Source of funding not reported

|                        |          |                                                            |                 |                               |                                |                        |               |      |
|------------------------|----------|------------------------------------------------------------|-----------------|-------------------------------|--------------------------------|------------------------|---------------|------|
| cross-sectional<br>400 | moderate | Residents at eight sites in Northern India. Aged >30 years | <b>Literacy</b> | <b>Current alcohol intake</b> | 226 Literate<br>177 Illiterate | <b>0.9</b><br><b>1</b> | 0.4-2.1<br>OR | 0.01 |
| India                  |          |                                                            |                 |                               |                                |                        |               |      |

adjusted for age, sex, literacy, place of residence

**Samuel et al. (2012)** - Funded by the British Heart Foundation

|                          |      |                                                                                                              |                             |                    |                                                                                                                     |                                                                |                                                |  |
|--------------------------|------|--------------------------------------------------------------------------------------------------------------|-----------------------------|--------------------|---------------------------------------------------------------------------------------------------------------------|----------------------------------------------------------------|------------------------------------------------|--|
| cross-sectional<br>2,218 | high | Young adults from population-based birth cohort in rural and urban areas of southern India. Aged 26-32 years | <b>Wealth (asset score)</b> | <b>Alcohol use</b> | Low (quintile 1)<br>Middle-low (quintile 2)<br>Middle (quintile 3)<br>Middle-high (quintile 4)<br>High (Quintile 5) | <b>1</b><br><b>0.8</b><br><b>0.8</b><br><b>1</b><br><b>0.8</b> | OR<br>0.6-1.3<br>0.6-1.3<br>0.7-1.5<br>0.5-1.3 |  |
| India                    |      |                                                                                                              | <b>Education</b>            | <b>Alcohol use</b> | Low (0 years formal schooling)<br>Middle-low (1-8 years)<br>Middle-high (9-12)<br>High (>12 years)                  | <b>1</b><br><b>1.3</b><br><b>1.1</b><br><b>0.6</b>             | OR<br>0.7-2.3<br>0.6-1.9<br>0.3-1.2            |  |

adjusted for gender, place of residence, possessions score, adult educational status, paternal educational status

**Gupta et al. (2012)** - Funded by the South Asian Society of Atherosclerosis and Thrombosis

|                          |      |                                                                                                                                                 |                                                                             |                      |                                                                                |                                              |  |
|--------------------------|------|-------------------------------------------------------------------------------------------------------------------------------------------------|-----------------------------------------------------------------------------|----------------------|--------------------------------------------------------------------------------|----------------------------------------------|--|
| cross-sectional<br>6,198 | high | General population in middle-class areas of 11 cities, excluded house-bound, pregnant and those likely to die within 6 months. Aged 18-75 years | <b>Education</b>                                                            | <b>Alcohol abuse</b> | 1,248 Low (0-10 years)<br>2,956 Middle (11-15 years)<br>1,366 High (>15 years) | <b>9.6%</b><br><b>10.3%</b><br><b>11.5%</b>  |  |
| India                    |      |                                                                                                                                                 | <b>Occupational Class</b><br>(British Social Register, housewife = husband) | <b>Alcohol abuse</b> | 1,287 Low (4-5)<br>1,677 Middle (3 manual/non-manua<br>3,018 High (1-2 )       | <b>5.1%</b><br><b>13.3%</b><br><b>10.8%</b>  |  |
|                          |      |                                                                                                                                                 | <b>SES (self-assessed)</b>                                                  | <b>Alcohol abuse</b> | 374 Low (score 1-3)<br>3,622 Middle (score 4-6)<br>1,114 High ( score 7-10)    | <b>11.2%</b><br><b>11.6%</b><br><b>11.4%</b> |  |

adjusted for age and sex

## Alcohol

**Deepa et al. (2011)** - Source of funding not reported

|        |       |          |                                                  |               |                                      |                                            |  |  |                         |
|--------|-------|----------|--------------------------------------------------|---------------|--------------------------------------|--------------------------------------------|--|--|-------------------------|
| cohort | 1,122 | moderate | Urban residential colonies of Chennai. Aged >20y | <b>Income</b> | <b>Alcohol use</b>                   | 526 Middle (INR 5,501-10,000/mo) <b>4%</b> |  |  | <0.05                   |
| India  |       |          |                                                  |               | drinks any quantity of alcohol daily | 596 Low (INR 2,500-5,500/month) <b>19%</b> |  |  |                         |
|        |       |          |                                                  |               |                                      |                                            |  |  | No adjustment described |

**Kinra et al. (2010)** - Funded by the Wellcome Trust

|                 |       |      |                                                                                        |                                    |                             |                          |              |           |                  |
|-----------------|-------|------|----------------------------------------------------------------------------------------|------------------------------------|-----------------------------|--------------------------|--------------|-----------|------------------|
| cross-sectional | 1,983 | high | Nationally representative sample of rural inhabitants from 1600 villages in 18 states. | <b>SES (men) assets, housing</b>   | <b>Alcohol use</b>          | 147 Low (asset score)    | <b>33.7%</b> | 26.2-41.2 | <0.001           |
| India           |       |      | Aged 20-69 years                                                                       |                                    | consumed >10 days/month any | 358 Middle (asset score) | <b>26.9%</b> | 22.3-31.5 |                  |
|                 |       |      |                                                                                        |                                    |                             | 870 High (asset score)   | <b>20.2%</b> | 17.5-22.9 |                  |
|                 |       |      |                                                                                        | <b>SES (women) assets, housing</b> | <b>Alcohol use</b>          | 106 Low (asset score)    | <b>11.2%</b> | 5.6-16.8  | <0.001           |
|                 |       |      |                                                                                        |                                    | consumed >10 days/month any | 143 Middle (asset score) | <b>8.1%</b>  | 3.4-12.9  |                  |
|                 |       |      |                                                                                        |                                    |                             | 359 High (asset score)   | <b>2.5%</b>  | 1-4.1     |                  |
|                 |       |      |                                                                                        |                                    |                             |                          |              |           | adjusted for age |

**Menon et al. (2015)** - Source of funding not reported

|                 |        |          |                                          |                 |                         |                                 |              |  |         |
|-----------------|--------|----------|------------------------------------------|-----------------|-------------------------|---------------------------------|--------------|--|---------|
| cross-sectional | 84,456 | moderate | Representative sample from Kerala state. | <b>Poverty*</b> | <b>Alcohol user</b>     | 62,975 Above state poverty line | <b>10.3%</b> |  |         |
| India           |        |          | Aged >18 years                           |                 |                         | 21,481 Below state poverty line | <b>14.6%</b> |  |         |
|                 |        |          |                                          | <b>Poverty*</b> | <b>&lt;1 drink/week</b> | 62,975 Above state poverty line | <b>96.4%</b> |  | <0.0001 |
|                 |        |          |                                          |                 | <b>1 drink/week</b>     |                                 | <b>1.2%</b>  |  |         |
|                 |        |          |                                          |                 | <b>2 drinks/week</b>    |                                 | <b>0.9%</b>  |  |         |
|                 |        |          |                                          |                 | <b>3 drinks/week</b>    |                                 | <b>0.6%</b>  |  |         |
|                 |        |          |                                          |                 | <b>4 drinks/week</b>    |                                 | <b>0.1%</b>  |  |         |
|                 |        |          |                                          |                 | <b>5 drinks/week</b>    |                                 | <b>0.1%</b>  |  |         |
|                 |        |          |                                          |                 | <b>6 drinks/week</b>    |                                 | <b>0.1%</b>  |  |         |
|                 |        |          |                                          |                 | <b>7 drinks/week</b>    |                                 | <b>0.5%</b>  |  |         |
|                 |        |          |                                          | <b>Poverty*</b> | <b>&lt;1 drink/week</b> | 21,481 Below state poverty line | <b>94.3%</b> |  | <0.0001 |
|                 |        |          |                                          |                 | <b>1 drink/week</b>     |                                 | <b>1.8%</b>  |  |         |
|                 |        |          |                                          |                 | <b>2 drinks/week</b>    |                                 | <b>1.4%</b>  |  |         |
|                 |        |          |                                          |                 | <b>3 drinks/week</b>    |                                 | <b>1.0%</b>  |  |         |
|                 |        |          |                                          |                 | <b>4 drinks/week</b>    |                                 | <b>0.3%</b>  |  |         |
|                 |        |          |                                          |                 | <b>5 drinks/week</b>    |                                 | <b>0.2%</b>  |  |         |
|                 |        |          |                                          |                 | <b>6 drinks/week</b>    |                                 | <b>0.1%</b>  |  |         |
|                 |        |          |                                          |                 | <b>7 drinks/week</b>    |                                 | <b>0.8%</b>  |  |         |

\*Keralan government definition: families which meet >4 of the following: no land or less than 5 cents, no house/dilapidated house; no sanitation latrine; no regular

*employed person in house; no access to safe drinking water; women-headed household or presence of widow or divorce; scheduled class/tribe; mentally retarded or (rural) disabled member in the family; no colour TV (urban) or family with an illiterate adult member*

no adjustment described

**Zaman et al. (2012)** - Funded by the Byrraju Foundation and the Initiative for Cardiovascular Health Research in Developing Countries

|                 |          |                                                                 |                           |                         |       |                                                                                                         |              |        |
|-----------------|----------|-----------------------------------------------------------------|---------------------------|-------------------------|-------|---------------------------------------------------------------------------------------------------------|--------------|--------|
| cross-sectional | moderate | Representative sample from 20 villages in rural Andhra Pradesh. | <b>Education (men)</b>    | <b>Alcohol use</b>      | 1,311 | High (primary or higher)                                                                                | <b>25.5%</b> | <0.001 |
| 4,535           |          |                                                                 |                           | ≥1 drink on ≥1 day/week | 895   | Low (no formal education)                                                                               | <b>36.8%</b> |        |
| India           |          | Aged >30 years                                                  | <b>Education (women)</b>  | <b>Alcohol use</b>      | 1,074 | High (primary or higher)                                                                                | <b>0.5%</b>  | 0.014  |
|                 |          |                                                                 |                           | ≥1 drink on ≥1 day/week | 1,255 | Low (no formal education)                                                                               | <b>1.8%</b>  |        |
|                 |          |                                                                 | <b>Occupation (men)</b>   | <b>Alcohol use</b>      | 434   | Skilled*                                                                                                | <b>23.7%</b> | <0.001 |
|                 |          |                                                                 |                           | ≥1 drink on ≥1 day/week | 1,501 | Unskilled                                                                                               | <b>34.8%</b> |        |
|                 |          |                                                                 | <b>Occupation (women)</b> | <b>Alcohol use</b>      | 88    | Skilled*                                                                                                | <b>2.3%</b>  | 0.997  |
|                 |          |                                                                 |                           | ≥1 drink on ≥1 day/week | 872   | Unskilled                                                                                               | <b>2.3%</b>  |        |
|                 |          |                                                                 |                           |                         |       | <i>*skilled manual labour, owner of business/farmer office worker/non-professional or professional)</i> |              |        |
|                 |          |                                                                 | <b>Income (men)</b>       | <b>Alcohol use</b>      | 912   | High (>2000 INR/month)                                                                                  | <b>26.3%</b> | 0.005  |
|                 |          |                                                                 |                           | ≥1 drink on ≥1 day/week | 717   | Middle (1200-1999 INR/month)                                                                            | <b>34.3%</b> |        |
|                 |          |                                                                 |                           |                         | 577   | Low (0-1199 INR/month)                                                                                  | <b>30.7%</b> |        |
|                 |          |                                                                 | <b>Income (women)</b>     | <b>Alcohol use</b>      | 945   | High (>2000 INR/month)                                                                                  | <b>1.4%</b>  | 0.35   |
|                 |          |                                                                 |                           | ≥1 drink on ≥1 day/week | 550   | Middle (1200-1999 INR/month)                                                                            | <b>0.9%</b>  |        |
|                 |          |                                                                 |                           |                         | 834   | Low (0-1199 INR/month)                                                                                  | <b>1.1%</b>  |        |

no adjustment described

**Pillai et al. (2013)** - Funded by the Indian National Institute on Alcohol Abuse and Alcoholism, Public Health Institute

|                 |          |                                         |                        |                                                      |  |                              |              |       |
|-----------------|----------|-----------------------------------------|------------------------|------------------------------------------------------|--|------------------------------|--------------|-------|
| cross-sectional | moderate | Urban and rural male drinkers from Goa. | <b>Wealth (assets)</b> | <b>Drunkennes</b>                                    |  | high (upper three quintiles) | <b>6.7%</b>  | 0.205 |
| 742             |          |                                         |                        | feel drunk at least once per week                    |  | Low (lower two quintiles)    | <b>7.8%</b>  |       |
| India           |          | Aged 18-49 years                        | <b>Wealth (assets)</b> | <b>Frequent heavy drinking</b>                       |  | high (upper three quintiles) | <b>25.5%</b> | 0.002 |
|                 |          |                                         |                        | >5 drinks in a single occasion at least once a month |  | Low (lower two quintiles)    | <b>35.8%</b> |       |
|                 |          |                                         | <b>Wealth (assets)</b> | <b>High risk alcohol use</b>                         |  | high (upper three quintiles) | <b>14.5%</b> | 0.002 |

## Alcohol

|                  |                                |                                                                   |                                |              |       |
|------------------|--------------------------------|-------------------------------------------------------------------|--------------------------------|--------------|-------|
|                  |                                | >60g pure alcohol consumed per drinking day in the last 12 months | Low (lower two quintiles)      | <b>15.4%</b> |       |
| <b>Education</b> | <b>Drunkenness</b>             | feel drunk at least once per week                                 | high (high school)             | <b>5.2%</b>  | 0.205 |
|                  |                                |                                                                   | middle (primary/middle school) | <b>11.7%</b> |       |
|                  |                                |                                                                   | low (no education)             | <b>16.2%</b> |       |
| <b>Education</b> | <b>Frequent heavy drinking</b> |                                                                   | high (high school)             | <b>22.0%</b> | 0.002 |
|                  |                                | >5 drinks in a single occasion at least once a month - i.e. binge | middle (primary/middle school) | <b>44.5%</b> |       |
|                  |                                |                                                                   | low (no education)             | <b>63.3%</b> |       |
| <b>Education</b> | <b>High risk alcohol use</b>   | >60g pure alcohol consumed per drinking day in the last 12 months | high (high school)             | <b>64.0%</b> | 0.002 |
|                  |                                |                                                                   | middle (primary/middle school) | <b>39.0%</b> |       |
|                  |                                |                                                                   | low (no education)             | <b>8.0%</b>  |       |
|                  |                                |                                                                   | no adjustment described        |              |       |

**Subramanian et al. (2005)** - Source of funding not reported

|                 |      |                          |                            |                         |        |                                |             |           |
|-----------------|------|--------------------------|----------------------------|-------------------------|--------|--------------------------------|-------------|-----------|
| cross-sectional | high | Data from the nationally | <b>Caste (men)</b>         | <b>Drink alcohol</b>    | 60,001 | Other (High)                   | <b>1</b>    | OR        |
| 301,984         |      | representative 1998/9    |                            | household member drinks | 41,984 | Other backward class (Medium)  | <b>1.08</b> | 1.04-1.12 |
| India           |      | Indian National Family   |                            | alcohol                 | 24,503 | Scheduled caste (Low)          | <b>1.43</b> | 1.37-1.49 |
|                 |      | Health Survey.           |                            |                         | 18,362 | Scheduled tribe (Low)          | <b>2.04</b> | 1.92-2.17 |
|                 |      | Aged >18 years           | <b>Education (men)</b>     | <b>Drink alcohol</b>    | 4,328  | Highest (postgraduate)         | <b>1</b>    | OR        |
|                 |      |                          |                            | household member drinks | 13,004 | High (college)                 | <b>1.11</b> | 1.01-1.22 |
|                 |      |                          |                            | alcohol                 | 14,170 | Medium-high (higher secondary) | <b>1.21</b> | 1.1-1.33  |
|                 |      |                          |                            |                         | 54,516 | Medium-low (secondary)         | <b>1.75</b> | 1.61-1.91 |
|                 |      |                          |                            |                         | 27,504 | Low (primary)                  | <b>2.13</b> | 1.95-2.33 |
|                 |      |                          |                            |                         | 38,523 | Lowest (Illiterate)            | <b>2.28</b> | 2.08-2.5  |
|                 |      |                          | <b>Wealth (men) assets</b> | <b>Drink alcohol</b>    | 34,133 | Highest                        | <b>1</b>    | OR        |
|                 |      |                          |                            | household member drinks | 31,611 | High                           | <b>1.12</b> | 1.07-1.18 |
|                 |      |                          |                            | alcohol                 | 30,413 | Medium                         | <b>1.30</b> | 1.24-1.37 |

## Alcohol

|                              |                                 |  |        |                                |             |           |
|------------------------------|---------------------------------|--|--------|--------------------------------|-------------|-----------|
|                              |                                 |  | 28,985 | Low                            | <b>1.59</b> | 1.51-1.68 |
|                              |                                 |  | 26,903 | Lowest                         | <b>1.92</b> | 1.81-2.03 |
| <b>Caste (women)</b>         | <b>Drink alcohol</b>            |  | 58,977 | Other (High)                   | <b>1</b>    | OR        |
|                              | household member drinks alcohol |  | 41,614 | Other backward class (Medium)  | <b>1.55</b> | 1.31-1.83 |
|                              |                                 |  | 23,847 | Scheduled caste (Low)          | <b>1.66</b> | 1.47-1.87 |
|                              |                                 |  | 18,373 | Scheduled tribe (Low)          | <b>3.74</b> | 2.79-5    |
| <b>Education (women)</b>     | <b>Drink alcohol</b>            |  | 2,154  | Highest (postgraduate)         | <b>1</b>    | OR        |
|                              | household member drinks alcohol |  | 6,948  | High (college)                 | <b>0.85</b> | 0.72-1    |
|                              |                                 |  | 7,571  | Medium-high (higher secondary) | <b>0.55</b> | 0.41-0.75 |
|                              |                                 |  | 33,133 | Medium-low (secondary)         | <b>0.81</b> | 0.62-1.05 |
|                              |                                 |  | 22,952 | Low (primary)                  | <b>1.00</b> | 0.74-1.35 |
|                              |                                 |  | 77,181 | Lowest (Illiterate)            | <b>1.31</b> | 1-1.71    |
| <b>Wealth (women) assets</b> | <b>Drink alcohol</b>            |  | 34,049 | Highest                        | <b>1</b>    | OR        |
|                              | household member drinks alcohol |  | 30,798 | High                           | <b>1.17</b> | 0.94-1.45 |
|                              |                                 |  | 29,156 | Medium                         | <b>1.60</b> | 1.23-2.09 |
|                              |                                 |  | 27,836 | Low                            | <b>1.96</b> | 1.53-2.43 |
|                              |                                 |  | 28,100 | Lowest                         | <b>2.72</b> | 2.18-3.39 |

adjusted for living environment, marital status, age, religion, caste, education, household standard of living index

**Hashibe et al. (2003)** - Funded by Assoc. Int Cancer Research; Imperial Cancer Research Fund; National Cancer Institute (USA) & UCLA Jonsson Cancer Centre Foundation

|                                 |      |                                                                                                                                                                       |                   |                 |                             |              |         |
|---------------------------------|------|-----------------------------------------------------------------------------------------------------------------------------------------------------------------------|-------------------|-----------------|-----------------------------|--------------|---------|
| case-control<br>47,773<br>India | high | Study examining SES and premalignant oral lesions in Kerala. Data is presented linking NCD risk factors with SES markers for the 47,773 controls only. Aged >35 years | <b>Income</b>     | <b>Drinking</b> | Low (INR<1500)              | <b>16.8%</b> | <0.0001 |
|                                 |      |                                                                                                                                                                       |                   |                 | Middle-low (INR 1500-3000)  | <b>12.4%</b> |         |
|                                 |      |                                                                                                                                                                       |                   |                 | Middle-high (INR 3001-5000) | <b>11.2%</b> |         |
|                                 |      |                                                                                                                                                                       |                   |                 | High (INR>5000)             | <b>9.3%</b>  |         |
|                                 |      |                                                                                                                                                                       | <b>Education</b>  | <b>Drinking</b> | None/illiterate             | <b>11.6%</b> |         |
|                                 |      |                                                                                                                                                                       |                   |                 | None/literate               | <b>8.3%</b>  |         |
|                                 |      |                                                                                                                                                                       |                   |                 | Primary                     | <b>15.4%</b> |         |
|                                 |      |                                                                                                                                                                       |                   |                 | Middle                      | <b>17.2%</b> |         |
|                                 |      |                                                                                                                                                                       |                   |                 | >High school                | <b>15.4%</b> |         |
|                                 |      |                                                                                                                                                                       | <b>Occupation</b> | <b>Drinking</b> | Manual                      | <b>12.5%</b> |         |
|                                 |      |                                                                                                                                                                       |                   |                 | Teacher/office              | <b>18.7%</b> |         |
|                                 |      |                                                                                                                                                                       |                   |                 | Business                    | <b>30.0%</b> |         |
|                                 |      |                                                                                                                                                                       |                   |                 | Retired                     | <b>24.7%</b> |         |
|                                 |      |                                                                                                                                                                       |                   |                 | Other                       | <b>34.3%</b> |         |

No adjustment described

**Neufeld et al. (2005)** - No external funding

|                                         |      |                                                                    |                  |                                       |         |                           |            |         |
|-----------------------------------------|------|--------------------------------------------------------------------|------------------|---------------------------------------|---------|---------------------------|------------|---------|
| cross-sectional<br>471,143<br><br>India | high | Data from the 1995/6 Indian National Sample Survey. Aged >10 years | <b>Poverty*</b>  | <b>Alcohol</b>                        | 303,416 | High (above poverty line) | <b>1</b>   | OR      |
|                                         |      |                                                                    |                  | regular use of any alcoholic beverage | 167,727 | Low (below poverty line)  | <b>1.2</b> | 1.1-1.4 |
|                                         |      |                                                                    | <b>Caste**</b>   | <b>Alcohol</b>                        | 334,512 | High                      | <b>1</b>   | OR      |
|                                         |      |                                                                    |                  | regular use of any alcoholic beverage | 136,631 | Low                       | <b>3.4</b> | 3-3.8   |
|                                         |      |                                                                    | <b>Education</b> | <b>Alcohol</b>                        | 273,069 | High (formal education)   | <b>1</b>   | OR      |
|                                         |      |                                                                    |                  | regular use of any alcoholic beverage | 188,956 | Low (no formal education) | <b>1.3</b> | 1.2-1.4 |

\*Planning commission of India definition - income required to ensure adequate intake of calories (INR 2,100 urban; INR 2,400 rural)

\*\*Scheduled Castes and tribes - identified in the Indian Constitution as especially disadvantaged or needy

adjusted for age group, gender caste, income, residence, education

**Dhungana et al. (2014)** - Source of funding not reported

|                                 |         |                                                               |                                            |                                                     |                                 |              |        |
|---------------------------------|---------|---------------------------------------------------------------|--------------------------------------------|-----------------------------------------------------|---------------------------------|--------------|--------|
| cross-sectional<br>406<br>Nepal | high    | Rural community in the Sindhuli district.<br>Aged 20-50 years | <b>Caste</b>                               | <b>Alcohol use</b>                                  | High (Brahman/Chhetri)          | <b>31.1%</b> | <0.001 |
|                                 |         |                                                               |                                            | use of alcohol until up to 30 days before interview | Middle (Adhibasi/Janajati)      | <b>56.2%</b> |        |
|                                 |         |                                                               |                                            |                                                     | Low (Dalits)                    | <b>42.9%</b> |        |
|                                 |         |                                                               | <b>Education</b>                           | <b>Alcohol use</b>                                  | Low (No formal education)       | <b>58.5%</b> | <0.001 |
|                                 |         |                                                               |                                            | use of alcohol until up to 30 days before interview | Middle-low (lower than primary) | <b>55.2%</b> |        |
|                                 |         |                                                               |                                            |                                                     | Middle-high (primary)           | <b>36.1%</b> |        |
|                                 |         |                                                               |                                            |                                                     | High (Secondary and higher)     | <b>26.0%</b> |        |
|                                 |         |                                                               | <b>SES (education, occupation, income)</b> | <b>Alcohol use</b>                                  | Lowest                          | <b>57.4%</b> | 0.012  |
|                                 |         |                                                               |                                            | use of alcohol until up to 30 days before interview | Middle-low                      | <b>42.6%</b> |        |
|                                 |         |                                                               |                                            |                                                     | Middle-high                     | <b>53.1%</b> |        |
|                                 | Highest | <b>31.2%</b>                                                  |                                            |                                                     |                                 |              |        |

No adjustment described

**Rahlenbeck and Gebre-Yohannes (1998)** - Funded by the Ethiopian Science and Technology Commission resources

|                       |     |                                                                                                                |                          |                    |    |                       |            |       |
|-----------------------|-----|----------------------------------------------------------------------------------------------------------------|--------------------------|--------------------|----|-----------------------|------------|-------|
| cross-sectional<br>66 | low | Medical students at Gondar college in north-west Ethiopia.<br>Age range not reported (mean 20.8 years, SD=1.6) | <b>Income (parental)</b> | <b>Alcohol use</b> | 17 | High (>US\$150/month) | <b>35%</b> | 0.013 |
|                       |     |                                                                                                                |                          |                    |    |                       |            |       |

## Alcohol

|                                                                                                                                             |          |                                                                                                                                |                                                                      |                                    |                       |                          |  |               |                         |
|---------------------------------------------------------------------------------------------------------------------------------------------|----------|--------------------------------------------------------------------------------------------------------------------------------|----------------------------------------------------------------------|------------------------------------|-----------------------|--------------------------|--|---------------|-------------------------|
| Ethiopia                                                                                                                                    |          |                                                                                                                                |                                                                      |                                    | 49                    | Low (<US\$150/month)     |  | <b>31%</b>    |                         |
|                                                                                                                                             |          |                                                                                                                                |                                                                      |                                    |                       |                          |  |               | No adjustment described |
| <b>Taylor et al. (1996)</b> - Funded by the International Network for Clinical Epidemiology; National Institute of Medical Research (Lagos) |          |                                                                                                                                |                                                                      |                                    |                       |                          |  |               |                         |
| cross-sectional                                                                                                                             | low      | Survey of adults selected from the civil service, three research institutions and two communities.                             | <b>Income (men) 20-39 years</b>                                      | <b>Alcohol consumption</b>         |                       | Low (<NGN 3000/year)     |  | <b>75.2%</b>  | <0.01                   |
| 882                                                                                                                                         |          |                                                                                                                                |                                                                      | 'consumes alcohol'                 |                       | High (>NGN 3000/year)    |  | <b>79.5%</b>  |                         |
| Nigeria                                                                                                                                     |          | Aged >20 years                                                                                                                 | <b>Income (men) 40-59 years</b>                                      | <b>Alcohol consumption</b>         |                       | Low (<NGN 3000/year)     |  | <b>63.5%</b>  | <0.01                   |
|                                                                                                                                             |          |                                                                                                                                |                                                                      | 'consumes alcohol'                 |                       | High (>NGN 3000/year)    |  | <b>90.0%</b>  |                         |
|                                                                                                                                             |          |                                                                                                                                | <b>Income (women) 20-39 years</b>                                    | <b>Alcohol consumption</b>         |                       | Low (<NGN 3000/year)     |  | <b>38.1%</b>  | <0.01                   |
|                                                                                                                                             |          |                                                                                                                                |                                                                      | 'consumes alcohol'                 |                       | High (>NGN 3000/year)    |  | <b>68.8%</b>  |                         |
|                                                                                                                                             |          |                                                                                                                                | <b>Income (women) 40-59 years</b>                                    | <b>Alcohol consumption</b>         |                       | Low (<NGN 3000/year)     |  | <b>30.6%</b>  | <0.01                   |
|                                                                                                                                             |          |                                                                                                                                |                                                                      | 'consumes alcohol'                 |                       | High (>NGN 3000/year)    |  | <b>76.3%</b>  |                         |
|                                                                                                                                             |          |                                                                                                                                |                                                                      |                                    |                       |                          |  |               | No adjustment described |
| <b>Bunker et al. (1996)</b> - Funded by the National Institute of Health                                                                    |          |                                                                                                                                |                                                                      |                                    |                       |                          |  |               |                         |
| cross-sectional                                                                                                                             | moderate | Civil servants selected from 3 different sites at three time periods: 1988, 1990 and 1992. This data from the 1992 Benin wave. | <b>SES (seniority) women</b>                                         | <b>Alcohol intake</b>              | 157                   | Senior staff             |  | <b>29.5g</b>  | >0.05                   |
| 713                                                                                                                                         |          |                                                                                                                                |                                                                      | mean ethanol intake g/week         | 234                   | Junior staff             |  | <b>26.6g</b>  |                         |
| Nigeria                                                                                                                                     |          | Aged 25-54 years                                                                                                               | <b>SES (seniority) men</b>                                           | <b>Alcohol intake</b>              | 401                   | Senior staff             |  | <b>145.6g</b> | >0.05                   |
|                                                                                                                                             |          |                                                                                                                                |                                                                      | mean ethanol intake g/week         | 635                   | Junior staff             |  | <b>161.4g</b> |                         |
|                                                                                                                                             |          |                                                                                                                                |                                                                      |                                    |                       |                          |  |               | No adjustment described |
| <b>Sossa et al. (2013)</b> - Funded by the Canadian International Development Agency                                                        |          |                                                                                                                                |                                                                      |                                    |                       |                          |  |               |                         |
| cohort                                                                                                                                      | 208      | moderate                                                                                                                       | Healthy adults sampled from a large city, small town and rural area. | <b>Education</b>                   |                       |                          |  |               |                         |
| Benin                                                                                                                                       |          |                                                                                                                                | Aged 25-60 years                                                     |                                    | <b>Alcohol intake</b> | High school              |  | <b>8.2g</b>   | (SD) 13.9               |
|                                                                                                                                             |          |                                                                                                                                |                                                                      |                                    | grams ethanol/day     | Primary schooling        |  | <b>5.1g</b>   | (SD) 8.6                |
|                                                                                                                                             |          |                                                                                                                                |                                                                      |                                    |                       | No Schooling             |  | <b>3.2g</b>   | (SD) 7.1                |
|                                                                                                                                             |          |                                                                                                                                |                                                                      |                                    |                       | No adjustment described  |  |               | <0.01                   |
|                                                                                                                                             |          |                                                                                                                                |                                                                      | <b>Wealth (assets)</b>             | <b>Alcohol intake</b> | High                     |  | <b>6.8g</b>   | (SD) 13.4               |
|                                                                                                                                             |          |                                                                                                                                |                                                                      |                                    | grams ethanol/day     | Medium                   |  | <b>5.4g</b>   | (SD) 8.8                |
|                                                                                                                                             |          |                                                                                                                                |                                                                      |                                    |                       | Low                      |  | <b>5.6g</b>   | (SD) 10.3               |
|                                                                                                                                             |          |                                                                                                                                |                                                                      |                                    |                       | No adjustment described  |  |               | 0.5                     |
|                                                                                                                                             |          |                                                                                                                                |                                                                      | <b>Income (US\$/dependent/day)</b> | <b>Ever drinker</b>   | Extremely Low (<\$1/day) |  | <b>1</b>      | OR                      |
|                                                                                                                                             |          |                                                                                                                                |                                                                      |                                    | ever drank alcohol    | Low (\$1-2/day)          |  | <b>1.16</b>   | 0.79-1.69               |
|                                                                                                                                             |          |                                                                                                                                |                                                                      |                                    |                       | Higher (>\$2/day)        |  | <b>1.2</b>    | 0.72-1.99               |

adjusted for age, sex, living history

**Houehanou et al. (2015)** - No external funding

|                 |          |                                                               |               |                                    |       |                               |              |
|-----------------|----------|---------------------------------------------------------------|---------------|------------------------------------|-------|-------------------------------|--------------|
| cross-sectional | moderate | Population-based nationally representative 2008 STEPS survey. |               |                                    |       |                               |              |
| 5,830           |          | Aged 25-64 years                                              | <b>Income</b> |                                    |       |                               |              |
| Benin           |          |                                                               |               | <b>Alcohol use</b>                 | 3,549 | Lowest (<FCFA 66,000*)        | <b>17.8%</b> |
|                 |          |                                                               |               | consume alcohol $\geq 4$ days/week | 1,034 | Low (FCFA 66,000-132,000)     | <b>16.5%</b> |
|                 |          |                                                               |               |                                    | 565   | Middle (FCFA 132,000-198,000) | <b>15.9%</b> |
|                 |          |                                                               |               |                                    | 378   | High (FCFA 198,000-264,000)   | <b>12.4%</b> |
|                 |          |                                                               |               |                                    | 304   | Highest (>FCFA 264,000)       | <b>11.2%</b> |

\*€100 = FCFA 65,657 at time of :

No adjustment described

**Cubbins et al. (2012)** - Funded by the National Institute on Alcohol Abuse and Alcoholism (USA)

|          |     |                                                                                                                            |                                    |                                             |  |  |  |
|----------|-----|----------------------------------------------------------------------------------------------------------------------------|------------------------------------|---------------------------------------------|--|--|--|
| RCT      | low | Baseline data from this trial of a behavioural intervention to reduce harmful alcohol use and risky sex at 30 rural sites. |                                    |                                             |  |  |  |
| 5,543    |     | Aged 18-30 years                                                                                                           | <b>No. months employed last yr</b> | <b>Current alcohol use</b>                  |  |  |  |
| Zimbabwe |     | Logistic regression                                                                                                        |                                    | drank alcohol at least once in last 30 days |  |  |  |
|          |     |                                                                                                                            | <b>No. months employed last yr</b> | <b>Frequency of alcohol use</b>             |  |  |  |
|          |     |                                                                                                                            |                                    | number of days drank in last 30 days        |  |  |  |
|          |     |                                                                                                                            | <b>No. months employed last yr</b> | <b>Quantity of drinks consumed</b>          |  |  |  |
|          |     |                                                                                                                            |                                    | number of drinks consumed on drinking days  |  |  |  |
|          |     |                                                                                                                            | <b>No. months employed last yr</b> | <b>Frequency of getting drunk</b>           |  |  |  |
|          |     |                                                                                                                            |                                    | frequency of drunkenness in last 30 days    |  |  |  |
|          |     |                                                                                                                            | <b>Years of education</b>          | <b>Current alcohol use</b>                  |  |  |  |
|          |     |                                                                                                                            |                                    | drank alcohol at least once in last 30 days |  |  |  |
|          |     |                                                                                                                            | <b>Years of education</b>          | <b>Frequency of alcohol use</b>             |  |  |  |
|          |     |                                                                                                                            |                                    | number of days drank in last 30 days        |  |  |  |
|          |     |                                                                                                                            | <b>Years of education</b>          | <b>Quantity of drinks consumed</b>          |  |  |  |
|          |     |                                                                                                                            |                                    | number of drinks consumed on drinking days  |  |  |  |
|          |     |                                                                                                                            | <b>Years of education</b>          | <b>Frequency of getting drunk</b>           |  |  |  |

adjusted for age, sex, months living away from home last year, ethnicity, religion, marital status, parity, years of education, months of employment last year, province crude death rate province population density, wave of study

**Laux (2014)** - Funded by National Institutes of Health (USA); University of Pittsburgh School of Medicine; National Centre for Research (USA)

|                 |          |                                                                    |                                    |                     |  |                          |             |
|-----------------|----------|--------------------------------------------------------------------|------------------------------------|---------------------|--|--------------------------|-------------|
| cross-sectional | moderate | Six communities in central and western Nicaragua. Aged 20-60 years | <b>Income (US\$/dependent/day)</b> |                     |  |                          |             |
| 1,355           |          |                                                                    |                                    | <b>Ever drinker</b> |  | Extremely Low (<\$1/day) | <b>1</b> OR |



## Alcohol

ever drank alcohol

Low (\$1-2/day)

**1.16** 0.79-1.69

Higher (&gt;2/day)

**1.2** 0.72-1.99

adjusted for age, sex, living history

| Design, n                                                                                | Quality  | Sample                                                                                                              | Exposure                                      | Outcome                                                                                    | n                | Exposure subgroup                 | Value        | 95% CI                | p                       |              |  |
|------------------------------------------------------------------------------------------|----------|---------------------------------------------------------------------------------------------------------------------|-----------------------------------------------|--------------------------------------------------------------------------------------------|------------------|-----------------------------------|--------------|-----------------------|-------------------------|--------------|--|
| Non peer-reviewed                                                                        |          |                                                                                                                     |                                               |                                                                                            |                  |                                   |              |                       |                         |              |  |
| <b>WHO STEPS Togo (2010)</b> - Source of funding not reported                            |          |                                                                                                                     |                                               |                                                                                            |                  |                                   |              |                       |                         |              |  |
| cross-sectional<br>4,370<br><br>Togo                                                     | moderate | Nationally representative STEPS survey. Residents from 6 zones who have lived there for >6 months. Aged 15-64 years | <b>Education</b>                              | <b>Harmful alcohol use</b><br><br>≥60 g of pure alcohol/day for men,<br>≥40g/day for women | 939              | No formal education               | <b>4.3%</b>  | 2.7-5.9               |                         |              |  |
|                                                                                          |          |                                                                                                                     |                                               |                                                                                            |                  | 503 Primary                       | <b>2.3%</b>  | 0.8-3.8               |                         |              |  |
|                                                                                          |          |                                                                                                                     |                                               |                                                                                            |                  | 430 Secondary                     | <b>3.3%</b>  | 1.3-5.4               |                         |              |  |
|                                                                                          |          |                                                                                                                     |                                               |                                                                                            |                  | 276 College or equivalent         | <b>2.9%</b>  | 0.8-5.1               |                         |              |  |
|                                                                                          |          |                                                                                                                     |                                               |                                                                                            |                  | 73 High school                    | <b>3.2%</b>  | 0-7.2                 |                         |              |  |
|                                                                                          |          |                                                                                                                     | 55 University                                 | <b>0.0%</b>                                                                                | 0-0              |                                   |              |                       |                         |              |  |
|                                                                                          |          |                                                                                                                     |                                               |                                                                                            | <b>Education</b> | <b>Insufficient fruit and veg</b> | 1,761        | No formal education   | <b>96.4%</b>            | 95-97.7      |  |
|                                                                                          |          |                                                                                                                     |                                               |                                                                                            |                  |                                   | 914          | Primary               | <b>94.8%</b>            | 92.8-96.8    |  |
|                                                                                          |          |                                                                                                                     |                                               |                                                                                            |                  |                                   | 875          | Secondary             | <b>93.8%</b>            | 91.5-96.2    |  |
|                                                                                          |          |                                                                                                                     |                                               |                                                                                            |                  |                                   | 504          | College or equivalent | <b>93.0%</b>            | 90.4-95.6    |  |
|                                                                                          |          |                                                                                                                     |                                               | 133                                                                                        | High school      | <b>96.1%</b>                      | 93-99.3      |                       |                         |              |  |
|                                                                                          |          |                                                                                                                     |                                               | 106                                                                                        | University       | <b>95.3%</b>                      | 91.3-99.3    |                       |                         |              |  |
|                                                                                          |          |                                                                                                                     |                                               |                                                                                            |                  |                                   |              |                       | no adjustment described |              |  |
| <b>WHO STEPS Eritrea (2004)</b> - Funded by WHO, Italian Government, Eritrean Government |          |                                                                                                                     |                                               |                                                                                            |                  |                                   |              |                       |                         |              |  |
| cross-sectional<br>2,033<br><br>Eritrea                                                  | moderate | Nationally representative sample, individuals<br><br>selected from six zones.<br>Aged 15-64 years                   | <b>Education</b>                              | <b>Low vegetable intake</b><br><br><2 servings per day                                     | 813              | Lowest (no formal education)      | <b>54.2%</b> |                       | 0.016                   |              |  |
|                                                                                          |          |                                                                                                                     |                                               |                                                                                            |                  | 721 Low (Grades 1-6)              | <b>50.8%</b> |                       |                         |              |  |
|                                                                                          |          |                                                                                                                     |                                               |                                                                                            |                  |                                   |              | 286                   | Middle (Grade 7-8)      | <b>47.2%</b> |  |
|                                                                                          |          |                                                                                                                     |                                               |                                                                                            |                  |                                   |              | 438                   | High (Grades 9-12)      | <b>48.4%</b> |  |
|                                                                                          |          |                                                                                                                     |                                               |                                                                                            |                  |                                   |              | 103                   | Highest (>12 years)     | <b>38.8%</b> |  |
|                                                                                          |          |                                                                                                                     |                                               |                                                                                            |                  |                                   |              | 2,352 total           |                         |              |  |
|                                                                                          |          |                                                                                                                     |                                               |                                                                                            |                  |                                   |              |                       |                         |              |  |
| <b>WHO STEPS India (2007)</b> - Funded by World Bank, Indian Government                  |          |                                                                                                                     |                                               |                                                                                            |                  |                                   |              |                       |                         |              |  |
| cross-sectional<br>38,064<br><br>India                                                   | moderate | WHO STEPS survey in seven states.<br>Aged 15-64                                                                     | <b>Education</b><br><br><b>Andhra Pradesh</b> | <b>Low fruit and vegetables</b><br><br><5 servings /day                                    | 6,218            | Illiterate                        | <b>92.8%</b> |                       |                         |              |  |
|                                                                                          |          |                                                                                                                     |                                               |                                                                                            |                  | Primary                           | <b>88.7%</b> |                       |                         |              |  |
|                                                                                          |          |                                                                                                                     |                                               |                                                                                            |                  | Middle                            | <b>85.5%</b> |                       |                         |              |  |
|                                                                                          |          |                                                                                                                     |                                               |                                                                                            |                  | Secondary                         | <b>84.0%</b> |                       |                         |              |  |
|                                                                                          |          |                                                                                                                     |                                               |                                                                                            |                  | Higher Secondary                  | <b>83.3%</b> |                       |                         |              |  |

|                       |                                 |       |                   |              |
|-----------------------|---------------------------------|-------|-------------------|--------------|
|                       |                                 |       | College and above | <b>81.5%</b> |
| <b>Education</b>      | <b>Low fruit and vegetables</b> | 5,853 | Illiterate        | <b>86.9%</b> |
| <b>Madhya Pradesh</b> | <5 servings /day                |       | Primary           | <b>84.0%</b> |
|                       |                                 |       | Middle            | <b>85.2%</b> |
|                       |                                 |       | Secondary         | <b>83.8%</b> |
|                       |                                 |       | Higher Secondary  | <b>69.3%</b> |
|                       |                                 |       | College and above | <b>65.9%</b> |
| <b>Education</b>      | <b>Low fruit and vegetables</b> | 6,091 | Illiterate        | <b>81.2%</b> |
| <b>Maharashtra</b>    | <5 servings /day                |       | Primary           | <b>80.9%</b> |
|                       |                                 |       | Middle            | <b>77.1%</b> |
|                       |                                 |       | Secondary         | <b>73.1%</b> |
|                       |                                 |       | Higher Secondary  | <b>73.0%</b> |
|                       |                                 |       | College and above | <b>69.6%</b> |
| <b>Education</b>      | <b>Low fruit and vegetables</b> | 4,495 | Illiterate        | <b>91.5%</b> |
| <b>Mizoram</b>        | <5 servings /day                |       | Primary           | <b>84.5%</b> |
|                       |                                 |       | Middle            | <b>85.8%</b> |
|                       |                                 |       | Secondary         | <b>84.1%</b> |
|                       |                                 |       | Higher Secondary  | <b>81.1%</b> |
|                       |                                 |       | College and above | <b>81.4%</b> |
| <b>Education</b>      | <b>Low fruit and vegetables</b> | 4,859 | Illiterate        | <b>94.1%</b> |
| <b>Kerala</b>         | <5 servings /day                |       | Primary           | <b>94.9%</b> |
|                       |                                 |       | Middle            | <b>92.2%</b> |
|                       |                                 |       | Secondary         | <b>88.8%</b> |
|                       |                                 |       | Higher Secondary  | <b>84.5%</b> |
|                       |                                 |       | College and above | <b>78.2%</b> |
| <b>Education</b>      | <b>Low fruit and vegetables</b> | 5,105 | Illiterate        | <b>99.5%</b> |
| <b>Tamil Nadu</b>     | <5 servings /day                |       | Primary           | <b>99.5%</b> |
|                       |                                 |       | Middle            | <b>99.1%</b> |
|                       |                                 |       | Secondary         | <b>98.6%</b> |
|                       |                                 |       | Higher Secondary  | <b>98.5%</b> |
|                       |                                 |       | College and above | <b>97.2%</b> |
| <b>Education</b>      | <b>Low fruit and vegetables</b> | 5,443 | Illiterate        | <b>94.6%</b> |
| <b>Uttarakhand</b>    | <5 servings /day                |       | Primary           | <b>93.1%</b> |
|                       |                                 |       | Middle            | <b>90.4%</b> |
|                       |                                 |       | Secondary         | <b>86.3%</b> |

|                                                                                                                                                                             |          |                                                                                                                                                                       |                       |                                  |                             |                             |         |         |
|-----------------------------------------------------------------------------------------------------------------------------------------------------------------------------|----------|-----------------------------------------------------------------------------------------------------------------------------------------------------------------------|-----------------------|----------------------------------|-----------------------------|-----------------------------|---------|---------|
|                                                                                                                                                                             |          |                                                                                                                                                                       |                       |                                  | Higher Secondary            | 83.0%                       |         |         |
|                                                                                                                                                                             |          |                                                                                                                                                                       |                       |                                  | College and above           | 80.5%                       |         |         |
|                                                                                                                                                                             |          |                                                                                                                                                                       |                       |                                  | no adjustment described     |                             |         |         |
| <b>Hashibe et al. (2003)</b> - Funded by Assoc. Int Cancer Research; Imperial Cancer Research Fund; National Cancer Institute (USA) & UCLA Jonnson Cancer Centre Foundation |          |                                                                                                                                                                       |                       |                                  |                             |                             |         |         |
| case-control                                                                                                                                                                | high     | Study examining SES and premalignant oral lesions in Kerala. Data is presented linking NCD risk factors with SES markers for the 47,773 controls only. Aged >35 years | <b>Income</b>         | <b>Fruits - high intake</b>      | Low (INR<1500)              | 87.5%                       |         |         |
| 47,773                                                                                                                                                                      |          |                                                                                                                                                                       |                       |                                  | Middle-low (INR 1500-3000)  | 92.1%                       |         |         |
| India                                                                                                                                                                       |          |                                                                                                                                                                       |                       |                                  | Middle-high (INR 3001-5000) | 93.0%                       |         |         |
|                                                                                                                                                                             |          |                                                                                                                                                                       |                       |                                  | High (INR>5000)             | 93.9%                       | <0.0001 |         |
|                                                                                                                                                                             |          |                                                                                                                                                                       |                       | <b>Education</b>                 | <b>Fruits - high intake</b> | Low (None/illiterate)       | 79.4%   |         |
|                                                                                                                                                                             |          |                                                                                                                                                                       |                       |                                  |                             | Middle-low (None/literate)  | 94.0%   |         |
|                                                                                                                                                                             |          |                                                                                                                                                                       |                       |                                  |                             | Middle (Primary)            | 89.4%   |         |
|                                                                                                                                                                             |          |                                                                                                                                                                       |                       |                                  |                             | Middle-high (Middle school) | 90.9%   |         |
|                                                                                                                                                                             |          |                                                                                                                                                                       |                       |                                  |                             | High (>High schools)        | 93.5%   | <0.0001 |
|                                                                                                                                                                             |          |                                                                                                                                                                       |                       | <b>Occupation</b>                | <b>Fruits- high intake</b>  | Manual                      | 89.4%   |         |
|                                                                                                                                                                             |          |                                                                                                                                                                       |                       |                                  |                             | Teacher/office              | 95.2%   |         |
|                                                                                                                                                                             |          |                                                                                                                                                                       |                       |                                  |                             | Business                    | 90.8%   |         |
|                                                                                                                                                                             |          |                                                                                                                                                                       |                       |                                  |                             | Retired                     | 86.1%   |         |
|                                                                                                                                                                             |          |                                                                                                                                                                       |                       |                                  |                             | Other                       | 94.9%   | <0.0001 |
|                                                                                                                                                                             |          |                                                                                                                                                                       |                       | <b>Income</b>                    | <b>Daily vegetables</b>     | Low (INR<1500)              | 88.6%   |         |
|                                                                                                                                                                             |          |                                                                                                                                                                       |                       |                                  |                             | Middle-low (INR 1500-3000)  | 96.2%   |         |
|                                                                                                                                                                             |          |                                                                                                                                                                       |                       |                                  |                             | Middle-high (INR 3001-5000) | 97.5%   |         |
|                                                                                                                                                                             |          |                                                                                                                                                                       |                       |                                  |                             | High (INR>5000)             | 98.5%   | <0.0001 |
|                                                                                                                                                                             |          |                                                                                                                                                                       | <b>Education</b>      | <b>Daily vegetables</b>          | None/illiterate             | 80.6%                       |         |         |
|                                                                                                                                                                             |          |                                                                                                                                                                       |                       |                                  | None/literate               | 92.4%                       |         |         |
|                                                                                                                                                                             |          |                                                                                                                                                                       |                       |                                  | Primary                     | 91.6%                       |         |         |
|                                                                                                                                                                             |          |                                                                                                                                                                       |                       |                                  | Middle                      | 94.1%                       |         |         |
|                                                                                                                                                                             |          |                                                                                                                                                                       |                       |                                  | >High schools               | 97.1%                       | <0.0001 |         |
|                                                                                                                                                                             |          |                                                                                                                                                                       | <b>Occupation</b>     | <b>Daily vegetables</b>          | Manual                      | 91.3%                       |         |         |
|                                                                                                                                                                             |          |                                                                                                                                                                       |                       |                                  | Teacher/office              | 98.7%                       |         |         |
|                                                                                                                                                                             |          |                                                                                                                                                                       |                       |                                  | Business                    | 95.6%                       |         |         |
|                                                                                                                                                                             |          |                                                                                                                                                                       |                       |                                  | Retired                     | 94.6%                       |         |         |
|                                                                                                                                                                             |          |                                                                                                                                                                       |                       |                                  | Other                       | 96.8%                       | <0.0001 |         |
|                                                                                                                                                                             |          |                                                                                                                                                                       |                       |                                  | no adjustment described     |                             |         |         |
| <b>Singh et al. (1998)</b> - Funding source not reported                                                                                                                    |          |                                                                                                                                                                       |                       |                                  |                             |                             |         |         |
| cross-sectional                                                                                                                                                             | moderate | Representative sample of                                                                                                                                              | <b>Income (males)</b> | <b>High saturated fat intake</b> | High (>600 rupees/month)    | 41%                         |         |         |

## Diet

|                |                                                           |                                              |                                                                                                        |                                                                                                           |                       |            |
|----------------|-----------------------------------------------------------|----------------------------------------------|--------------------------------------------------------------------------------------------------------|-----------------------------------------------------------------------------------------------------------|-----------------------|------------|
| 1,806<br>India | urban residents of<br>Moradabad city.<br>Aged 25-64 years | saturated fat comprises >10% kcal per<br>day | <b>Income (women)</b> <b>High saturated fat intake</b><br>saturated fat comprises >10% kcal per<br>day | Medium (300-600 rupees/month)                                                                             | <b>51%</b>            |            |
|                |                                                           |                                              |                                                                                                        | Low (<300 rupees/month)                                                                                   | <b>7%</b>             |            |
|                |                                                           |                                              |                                                                                                        | High (>600 rupees/month)                                                                                  | <b>43%</b>            |            |
|                |                                                           |                                              |                                                                                                        | Medium (300-600 rupees/month)                                                                             | <b>38%</b>            |            |
|                |                                                           |                                              |                                                                                                        | Low (<300 rupees/month)                                                                                   | <b>19%</b>            |            |
|                |                                                           |                                              |                                                                                                        | <b>Education (men)</b> <b>High saturated fat intake</b><br>saturated fat comprises >10% kcal per<br>day   | High (>5 years)       | <b>53%</b> |
|                |                                                           |                                              |                                                                                                        |                                                                                                           | Medium (primary only) | <b>39%</b> |
|                |                                                           |                                              |                                                                                                        |                                                                                                           | Low (no education)    | <b>7%</b>  |
|                |                                                           |                                              |                                                                                                        | <b>Education (women)</b> <b>High saturated fat intake</b><br>saturated fat comprises >10% kcal per<br>day | High (>5 years)       | <b>54%</b> |
|                |                                                           |                                              |                                                                                                        |                                                                                                           | Medium (primary only) | <b>33%</b> |
|                |                                                           |                                              |                                                                                                        |                                                                                                           | Low (no education)    | <b>13%</b> |
|                |                                                           |                                              |                                                                                                        | no adjustment described                                                                                   |                       |            |

**Menon et al. (2015)** - Source of funding not reported

|                                    |          |                                                               |                            |                            |              |                          |                            |         |
|------------------------------------|----------|---------------------------------------------------------------|----------------------------|----------------------------|--------------|--------------------------|----------------------------|---------|
| cross-sectional<br>84,456<br>India | moderate | Representative sample<br>from Kerala state.<br>Aged >18 years | <b>Poverty*</b>            | 0 non-vegetarian days/week | 62,975       | Above state poverty line | <b>83.6%</b>               | <0.0001 |
|                                    |          |                                                               |                            | 1 non-vegetarian day/week  |              |                          | <b>16.4%</b>               |         |
|                                    |          |                                                               |                            | 2 non-vegetarian days/week |              |                          | <b>0.1%</b>                |         |
|                                    |          |                                                               |                            | 3 non-vegetarian days/week |              |                          | <b>0.0%</b>                |         |
|                                    |          |                                                               |                            | 4 non-vegetarian days/week |              |                          | <b>0.0%</b>                |         |
|                                    |          |                                                               |                            | 5 non-vegetarian days/week |              |                          | <b>0.0%</b>                |         |
|                                    |          |                                                               |                            | 6 non-vegetarian days/week |              |                          | <b>0.0%</b>                |         |
|                                    |          |                                                               |                            | 7 non-vegetarian days/week |              |                          | <b>0.2%</b>                |         |
|                                    |          |                                                               |                            | <b>Poverty*</b>            |              |                          | 0 non-vegetarian days/week |         |
|                                    |          |                                                               | 1 non-vegetarian day/week  |                            | <b>12.8%</b> |                          |                            |         |
|                                    |          |                                                               | 2 non-vegetarian days/week |                            | <b>0.1%</b>  |                          |                            |         |
|                                    |          |                                                               | 3 non-vegetarian days/week |                            | <b>0.0%</b>  |                          |                            |         |
|                                    |          |                                                               | 4 non-vegetarian days/week |                            | <b>0.0%</b>  |                          |                            |         |
|                                    |          |                                                               | 5 non-vegetarian days/week |                            | <b>0.0%</b>  |                          |                            |         |
|                                    |          |                                                               | 6 non-vegetarian days/week |                            | <b>0.0%</b>  |                          |                            |         |
|                                    |          |                                                               | 7 non-vegetarian days/week |                            | <b>0.3%</b>  |                          |                            |         |
|                                    |          |                                                               | <b>Poverty*</b>            | Use oil on <1 day/week     | 62,975       | Above state poverty line | <b>10.1%</b>               | <0.0001 |
|                                    |          |                                                               |                            | Use oil 1 day/week         |              |                          | <b>89.3%</b>               |         |
|                                    |          |                                                               |                            | Use oil 2 days/week        |              |                          | <b>0.4%</b>                |         |

|  |                 |                                                                                                                                                                                                                                                                                                                                                                                                                                                             |                                  |        |                          |              |                   |
|--|-----------------|-------------------------------------------------------------------------------------------------------------------------------------------------------------------------------------------------------------------------------------------------------------------------------------------------------------------------------------------------------------------------------------------------------------------------------------------------------------|----------------------------------|--------|--------------------------|--------------|-------------------|
|  |                 |                                                                                                                                                                                                                                                                                                                                                                                                                                                             | <b>Use oil 3 days/week</b>       |        |                          | <b>0.1%</b>  |                   |
|  |                 |                                                                                                                                                                                                                                                                                                                                                                                                                                                             | <b>Use oil 4 days/week</b>       |        |                          | <b>0.0%</b>  |                   |
|  |                 |                                                                                                                                                                                                                                                                                                                                                                                                                                                             | <b>Use oil 5 days/week</b>       |        |                          | <b>0.1%</b>  |                   |
|  |                 |                                                                                                                                                                                                                                                                                                                                                                                                                                                             | <b>Use oil 6 days/week</b>       |        |                          | <b>0.0%</b>  |                   |
|  |                 |                                                                                                                                                                                                                                                                                                                                                                                                                                                             | <b>Use oil 7 days/week</b>       |        |                          | <b>0.1%</b>  |                   |
|  | <b>Poverty*</b> |                                                                                                                                                                                                                                                                                                                                                                                                                                                             | <b>Use oil on &lt;1 day/week</b> | 21,481 | Below state poverty line | <b>7.6%</b>  | <b>&lt;0.0001</b> |
|  |                 |                                                                                                                                                                                                                                                                                                                                                                                                                                                             | <b>Use oil 1 day/week</b>        |        |                          | <b>92.1%</b> |                   |
|  |                 |                                                                                                                                                                                                                                                                                                                                                                                                                                                             | <b>Use oil 2 days/week</b>       |        |                          | <b>0.2%</b>  |                   |
|  |                 |                                                                                                                                                                                                                                                                                                                                                                                                                                                             | <b>Use oil 3 days/week</b>       |        |                          | <b>0%</b>    |                   |
|  |                 |                                                                                                                                                                                                                                                                                                                                                                                                                                                             | <b>Use oil 4 days/week</b>       |        |                          | <b>0%</b>    |                   |
|  |                 |                                                                                                                                                                                                                                                                                                                                                                                                                                                             | <b>Use oil 5 days/week</b>       |        |                          | <b>0%</b>    |                   |
|  |                 |                                                                                                                                                                                                                                                                                                                                                                                                                                                             | <b>Use oil 6 days/week</b>       |        |                          | <b>0%</b>    |                   |
|  |                 |                                                                                                                                                                                                                                                                                                                                                                                                                                                             | <b>Use oil 7 days/week</b>       |        |                          | <b>0%</b>    |                   |
|  |                 | <p><i>*Keralan government definition: families which meet &gt;4 of the following: no land or less than 5 cents, no house/dilapidated house; no sanitation latrine; no regular employed person in house; no access to safe drinking water; women-headed household or presence of widow or divorce; scheduled class/tribe; mentally retarded or (rural) disabled member in the family; no colour TV (urban) or family with an illiterate adult member</i></p> |                                  |        |                          |              |                   |

no adjustment described

**Singh et al. (2000)** - Sandoz (Novartis) Foundation of Gerontologic Research (AUS); World Health Federation

|                 |     |                                                              |                                                    |                                |     |             |              |                 |
|-----------------|-----|--------------------------------------------------------------|----------------------------------------------------|--------------------------------|-----|-------------|--------------|-----------------|
| cross-sectional | low | Representative female sample from 5 cities. Aged 25-64 years | <b>SES (education, occupation, income, assets,</b> | <b>High salt intake</b>        | 985 | High        | <b>50.3%</b> | <b>&lt;0.09</b> |
| 3,257           |     |                                                              |                                                    | >6g/day                        | 790 | Medium-high | <b>53.3%</b> |                 |
| India           |     |                                                              |                                                    |                                | 774 | Medium      | <b>66.9%</b> |                 |
|                 |     |                                                              |                                                    |                                | 602 | Medium-low  | <b>66.1%</b> |                 |
|                 |     |                                                              |                                                    |                                | 206 | Low         | <b>59.7%</b> |                 |
|                 |     |                                                              | <b>SES (education, occupation, income, assets,</b> | <b>Sugar and confectionary</b> | 985 | High        | <b>52g</b>   | (SD) 71         |
|                 |     |                                                              |                                                    | average g/day                  | 790 | Medium-high | <b>42g</b>   | (SD) 12         |
|                 |     |                                                              |                                                    |                                | 774 | Medium      | <b>32g</b>   | (SD) 15         |

|  |  |                                                    |                                         |     |             |             |         |                         |
|--|--|----------------------------------------------------|-----------------------------------------|-----|-------------|-------------|---------|-------------------------|
|  |  |                                                    |                                         | 602 | Medium-low  | <b>25g</b>  | (SD) 8  |                         |
|  |  |                                                    |                                         | 206 | Low         | <b>13g</b>  | (SD) 3  |                         |
|  |  | <b>SES (education, occupation, income, assets,</b> | <b>Total visible fat</b>                |     |             |             |         |                         |
|  |  |                                                    | average g/day                           | 985 | High        | <b>45g</b>  | (SD) 18 | <0.01                   |
|  |  |                                                    |                                         | 790 | Medium-high | <b>34g</b>  | (SD) 15 |                         |
|  |  |                                                    |                                         | 774 | Medium      | <b>27g</b>  | (SD) 12 |                         |
|  |  |                                                    |                                         | 602 | Medium-low  | <b>22g</b>  | (SD) 9  |                         |
|  |  |                                                    |                                         | 206 | Low         | <b>8g</b>   | (SD) 4  |                         |
|  |  | <b>SES (education, occupation, income, assets,</b> | <b>Fruits, vegetables &amp; legumes</b> |     |             |             |         |                         |
|  |  |                                                    | average g/day                           | 985 | High        | <b>225g</b> | (SD) 55 | >0.05                   |
|  |  |                                                    |                                         | 790 | Medium-high | <b>222g</b> | (SD) 51 |                         |
|  |  |                                                    |                                         | 774 | Medium      | <b>256g</b> | (SD) 38 |                         |
|  |  |                                                    |                                         | 602 | Medium-low  | <b>210g</b> | (SD) 32 |                         |
|  |  |                                                    |                                         | 206 | Low         | <b>140g</b> | (SD) 26 |                         |
|  |  | <b>SES (education, occupation, income, assets,</b> | <b>Fruits, veg &amp; legumes : fat</b>  |     |             |             |         |                         |
|  |  |                                                    | ratio                                   | 985 | High        | <b>5</b>    | (SD) 2  | <0.05                   |
|  |  |                                                    |                                         | 790 | Medium-high | <b>6.5</b>  | (SD) 2  |                         |
|  |  |                                                    |                                         | 774 | Medium      | <b>9.4</b>  | (SD) 3  |                         |
|  |  |                                                    |                                         | 602 | Medium-low  | <b>9.5</b>  | (SD) 4  |                         |
|  |  |                                                    |                                         | 206 | Low         | <b>17.5</b> | (SD) 5  |                         |
|  |  |                                                    |                                         |     |             |             |         | no adjustment described |

**Zaman et al. (2012)** - Funded by the Byrraju Foundation and the Initiative for Cardiovascular Health Research in Developing Countries

|                 |          |                                                                 |                          |                                   |       |                           |              |        |
|-----------------|----------|-----------------------------------------------------------------|--------------------------|-----------------------------------|-------|---------------------------|--------------|--------|
| cross-sectional | moderate | Representative sample from 20 villages in rural Andhra Pradesh. | <b>Education (men)</b>   | <b>Low fruit intake</b>           | 1,311 | High (primary or higher)  | <b>37.4%</b> | <0.001 |
| 4,535           |          |                                                                 |                          | fruit consumed $\leq$ 1 days/week | 895   | Low (no formal education) | <b>55.6%</b> |        |
| India           |          | Aged >30 years                                                  |                          |                                   |       |                           |              |        |
|                 |          |                                                                 | <b>Education (women)</b> | <b>Low fruit intake</b>           | 1,074 | High (primary or higher)  | <b>43.4%</b> | <0.001 |
|                 |          |                                                                 |                          | fruit consumed $\leq$ 1 days/week | 1,255 | Low (no formal education) | <b>56.7%</b> |        |
|                 |          |                                                                 | <b>Occupation (men)</b>  | <b>Low fruit intake</b>           | 434   | Skilled*                  | <b>31.1%</b> | <0.001 |
|                 |          |                                                                 |                          | fruit consumed $\leq$ 1 days/week | 1,501 | Unskilled                 | <b>47.8%</b> |        |
|                 |          |                                                                 | <b>Occupation</b>        | <b>Low fruit intake</b>           | 88    | Skilled*                  | <b>50.0%</b> | 0.344  |

|  |                       |                                                                                                         |                         |                              |       |        |
|--|-----------------------|---------------------------------------------------------------------------------------------------------|-------------------------|------------------------------|-------|--------|
|  |                       | fruit consumed $\leq 1$ days/week                                                                       | 872                     | Unskilled                    | 55.4% |        |
|  |                       | <i>*skilled manual labour, owner of business/farmer office worker/non-professional or professional)</i> |                         |                              |       |        |
|  | <b>Income (men)</b>   | <b>Low fruit intake</b>                                                                                 | 912                     | High (>2000 INR/month)       | 36.0% | <0.001 |
|  |                       | fruit consumed $\leq 1$ days/week                                                                       | 717                     | Middle (1200-1999 INR/month) | 48.5% |        |
|  |                       |                                                                                                         | 577                     | Low (0-1199 INR/month)       | 54.8% |        |
|  | <b>Income (women)</b> | <b>Low fruit intake</b>                                                                                 | 945                     | High (>2000 INR/month)       | 43.4% | <0.001 |
|  |                       | fruit consumed $\leq 1$ days/week                                                                       | 550                     | Middle (1200-1999 INR/month) | 49.8% |        |
|  |                       |                                                                                                         | 834                     | Low (0-1199 INR/month)       | 59.2% |        |
|  |                       |                                                                                                         | no adjustment described |                              |       |        |

**Gupta et al. (2012)** - Funded by the South Asian Society of Atherosclerosis and Thrombosis

|                          |      |                                                                                                               |                            |                                 |       |                              |       |
|--------------------------|------|---------------------------------------------------------------------------------------------------------------|----------------------------|---------------------------------|-------|------------------------------|-------|
| cross-sectional<br>6,198 | high | General population in<br>middle-class areas of 11                                                             | <b>Education</b>           | <b>High dietary fat</b>         | 1,248 | Low (0-10 years)             | 46.2% |
|                          |      |                                                                                                               |                            | >20g/day                        | 2,956 | Middle (11-15 years)         | 49.8% |
| India                    |      | cities, excluded house-<br>bound, pregnant and those<br>likely to die within 6<br>months.<br>Aged 18-75 years |                            |                                 | 1,366 | High (>15 years)             | 60.0% |
|                          |      |                                                                                                               | <b>Occupational Class</b>  | <b>High dietary fat</b>         | 1,287 | Low (4-5)                    | 40.6% |
|                          |      |                                                                                                               | <b>(British Social</b>     | >20g/day                        | 1,677 | Middle (3 manual/non-manual) | 49.7% |
|                          |      |                                                                                                               | <b>housewife =</b>         |                                 | 3,018 | High (1-2 )                  | 55.7% |
|                          |      |                                                                                                               | <b>SES (self-assessed)</b> | <b>High dietary fat</b>         | 374   | Low (score 1-3)              | 41.8% |
|                          |      |                                                                                                               |                            | >20g/day                        | 3,622 | Middle (score 4-6)           | 53.1% |
|                          |      |                                                                                                               |                            |                                 | 1,114 | High ( score 7-10)           | 61.6% |
|                          |      |                                                                                                               | <b>Education</b>           | <b>Low fruit and vegetables</b> | 1,248 | Low (0-10 years)             | 23.9% |
|                          |      |                                                                                                               |                            | <2 servings/day                 | 2,956 | Middle (11-15 years)         | 29.3% |
|                          |      |                                                                                                               |                            |                                 | 1,366 | High (>15 years)             | 28.9% |
|                          |      |                                                                                                               | <b>Occupational Class</b>  | <b>Low fruit and vegetables</b> | 1,287 | Low (4-5)                    | 26.9% |
|                          |      |                                                                                                               | <b>(British Social</b>     | <2 servings/day                 | 1,677 | Middle (3 manual/non-manual) | 26.8% |
|                          |      |                                                                                                               | <b>housewife =</b>         |                                 | 3,018 | High (1-2 )                  | 26.4% |



|                                                                                                                                         |      |                                              |                                    |                                                   |        |                             |              |                          |
|-----------------------------------------------------------------------------------------------------------------------------------------|------|----------------------------------------------|------------------------------------|---------------------------------------------------|--------|-----------------------------|--------------|--------------------------|
|                                                                                                                                         |      |                                              | <b>SES (self-assessed)</b>         | <b>Low fruit and vegetables</b>                   | 374    | Low (score 1-3)             | <b>47.8%</b> |                          |
|                                                                                                                                         |      |                                              |                                    | <2 servings/day                                   | 3,622  | Middle (score 4-6)          | <b>24.7%</b> |                          |
|                                                                                                                                         |      |                                              |                                    |                                                   | 1,114  | High (score 7-10)           | <b>21.8%</b> |                          |
|                                                                                                                                         |      |                                              |                                    |                                                   |        |                             |              | adjusted for age and sex |
| <b>Agrawal et al. (2014a)</b> - Funded by a Wellcome Trust Strategic Award Grant                                                        |      |                                              |                                    |                                                   |        |                             |              |                          |
| cross-sectional                                                                                                                         | high | Nationally representative                    | <b>Caste</b>                       | <b>Non-vegetarian</b>                             | 29,831 | Scheduled caste (poorest)   | <b>74.0%</b> | <0.001                   |
| 156,317                                                                                                                                 |      | 2005/6 National Family                       |                                    | eats meat, fish, milk, eggs, curd, dairy products | 12,734 | Scheduled tribe (poorest)   | <b>75.2%</b> |                          |
| India                                                                                                                                   |      | Health Survey, participants aged 20-49 years |                                    |                                                   | 60,977 | Other backward class (poor) | <b>60.4%</b> |                          |
|                                                                                                                                         |      |                                              |                                    |                                                   | 48,854 | General (more affluent)     | <b>57.7%</b> |                          |
|                                                                                                                                         |      |                                              | <b>SES (assets and</b>             | <b>Non-vegetarian</b>                             | 26,389 | Lowest                      | <b>71.1%</b> | <0.001                   |
|                                                                                                                                         |      |                                              |                                    | eats meat, fish, milk, eggs, curd, dairy products | 28,751 | Low                         | <b>66.2%</b> |                          |
|                                                                                                                                         |      |                                              |                                    |                                                   | 31,232 | Middle                      | <b>65.4%</b> |                          |
|                                                                                                                                         |      |                                              |                                    |                                                   | 33,560 | High                        | <b>64.1%</b> |                          |
|                                                                                                                                         |      |                                              |                                    |                                                   | 36,385 | Highest                     | <b>54.0%</b> |                          |
|                                                                                                                                         |      |                                              |                                    |                                                   |        |                             |              | no adjustment described  |
| <b>Agrawal et al. (2014b)</b> - Funded by the Wellcome Trust; Council for England; National Institute for Health Research Collaboration |      |                                              |                                    |                                                   |        |                             |              |                          |
| cross-sectional                                                                                                                         | high | Nationally representative                    | <b>Caste</b>                       | <b>Daily fish consumption</b>                     |        | Low caste                   | <b>3.4%</b>  | <0.001                   |
| 156,317                                                                                                                                 |      | 2005/6 National Family                       |                                    |                                                   |        | Other caste                 | <b>44.0%</b> |                          |
| India                                                                                                                                   |      | Health Survey, participants aged 20-49 years |                                    |                                                   |        |                             |              |                          |
|                                                                                                                                         |      |                                              | <b>Wealth (assets and housing)</b> | <b>Daily fish consumption</b>                     |        | Highest (top quintile)      | <b>39.1%</b> | <0.001                   |
|                                                                                                                                         |      |                                              |                                    |                                                   |        | Lowest (bottom quintile)    | <b>8.2%</b>  |                          |
|                                                                                                                                         |      |                                              |                                    |                                                   |        |                             |              | no adjustment described  |
| <b>Ganesan et al. (2012)</b> - No external funding                                                                                      |      |                                              |                                    |                                                   |        |                             |              |                          |

|                          |      |                                                                                                                                                                        |                        |                                                                      |                         |              |         |
|--------------------------|------|------------------------------------------------------------------------------------------------------------------------------------------------------------------------|------------------------|----------------------------------------------------------------------|-------------------------|--------------|---------|
| cross-sectional<br>1,261 | high | 1,261 Diabetics and 122 non-diabetics from the population-based urban Sankara Nethralaya Diabetic Retinopathy Epidemiology and Molecular Genetic Study. Aged >40 years |                        |                                                                      |                         |              |         |
| India                    |      |                                                                                                                                                                        | <b>SES (undefined)</b> | <b>Low fibre diet</b><br>fibre score <32 on validated questionnaire  | Low                     | <b>11.9%</b> | 0.002   |
|                          |      |                                                                                                                                                                        |                        |                                                                      | Middle                  | <b>71.9%</b> | 0.237   |
|                          |      |                                                                                                                                                                        |                        |                                                                      | High                    | <b>16.1%</b> | <0.0001 |
|                          |      |                                                                                                                                                                        | <b>SES (undefined)</b> | <b>High fibre diet</b><br>fibre score >32 on validated questionnaire | Low                     | <b>6.5%</b>  | 0.002   |
|                          |      |                                                                                                                                                                        |                        |                                                                      | Middle                  | <b>68.8%</b> | 0.237   |
|                          |      |                                                                                                                                                                        |                        |                                                                      | High                    | <b>24.6%</b> | <0.0001 |
|                          |      |                                                                                                                                                                        |                        |                                                                      | no adjustment described |              |         |

**Radhika et al. (2007)** - Funded by the Chennai Willingdon Corporate Foundation

|                          |          |                                                                                                                                                       |                                    |                                      |                             |             |       |
|--------------------------|----------|-------------------------------------------------------------------------------------------------------------------------------------------------------|------------------------------------|--------------------------------------|-----------------------------|-------------|-------|
| cross-sectional<br>1,902 | moderate | Residents of Chennai recruited for CURES study on salt and hypertension. Excludes those with hypertension, diabetes and heart disease. Aged >20 years |                                    |                                      |                             |             |       |
| India                    |          |                                                                                                                                                       | <b>Household Income</b><br>monthly | <b>Salt intake</b><br>mean grams/day | High (>INR10000)            | <b>9.4g</b> | 0.006 |
|                          |          |                                                                                                                                                       |                                    |                                      | Medium-high (INR5000-10000) | <b>9.0g</b> |       |
|                          |          |                                                                                                                                                       |                                    |                                      | Medium-low (INR2000-5000)   | <b>8.5g</b> |       |
|                          |          |                                                                                                                                                       |                                    |                                      | Low (<INR2000)              | <b>7.9g</b> |       |
|                          |          |                                                                                                                                                       |                                    |                                      | no adjustment described     |             |       |

**Mehta (2000)** - Source of funding not reported

|                        |     |                                                                                 |                     |                                |                       |             |       |
|------------------------|-----|---------------------------------------------------------------------------------|---------------------|--------------------------------|-----------------------|-------------|-------|
| cross-sectional<br>320 | low | Elderly Indian residents of Baroda city, selected from corporate sector, senior | <b>Income (men)</b> | <b>Fat intake</b><br>grams/day | 60 High (undefined)   | <b>305g</b> | >0.05 |
| India                  |     |                                                                                 |                     |                                | 60 Middle (undefined) | <b>303g</b> |       |
|                        |     |                                                                                 |                     |                                | 50 Low (undefined)    | <b>126g</b> |       |

citizens council, retired peoples club, vadil vahar, women's clubs, temple and slum pockets of Baroda city. Aged 60-70 years

|                       |                   |    |                    |             |       |
|-----------------------|-------------------|----|--------------------|-------------|-------|
| <b>Income (women)</b> | <b>Fat intake</b> | 50 | High (undefined)   | <b>161g</b> | >0.05 |
|                       | grams/day         | 50 | Middle (undefined) | <b>152g</b> |       |
|                       |                   | 50 | Low (undefined)    | <b>99g</b>  |       |

**Kinra et al. (2010)** - Funded by the Wellcome Trust

|                 |      |                                                                                        |                            |                                       |     |                      |              |           |                         |
|-----------------|------|----------------------------------------------------------------------------------------|----------------------------|---------------------------------------|-----|----------------------|--------------|-----------|-------------------------|
| cross-sectional | high | Nationally representative sample of rural inhabitants from 1600 villages in 18 states. | <b>SES (men) assets,</b>   | <b>Low fruit and vegetable intake</b> | 147 | Low (asset score)    | <b>81.0%</b> | 74.5-87.5 | <0.001                  |
| 1,983           |      |                                                                                        |                            | <400g/day                             | 358 | Middle (asset score) | <b>75.6%</b> | 71.2-79.9 |                         |
| India           |      | Aged 20-69 years                                                                       |                            |                                       | 870 | High (asset score)   | <b>63.6%</b> | 60.3-66.8 |                         |
|                 |      |                                                                                        | <b>SES (women) assets,</b> | <b>Low fruit and vegetable intake</b> | 106 | Low (asset score)    | <b>86.6%</b> | 77.5-95.7 | <0.001                  |
|                 |      |                                                                                        | <b>housing</b>             | <400g/day                             | 143 | Middle (asset score) | <b>78.5%</b> | 71.4-85.5 |                         |
|                 |      |                                                                                        |                            | <i>variables; age standardised</i>    | 359 | High (asset score)   | <b>69.9%</b> | 65.2-74.7 |                         |
|                 |      |                                                                                        | <b>SES (men) assets,</b>   | <b>Low physical activity</b>          | 147 | Low (asset score)    | <b>65.2%</b> | 57.5-72.9 | 0.11                    |
|                 |      |                                                                                        |                            | <1.69 MET                             | 358 | Middle (asset score) | <b>72.4%</b> | 67.8-77   |                         |
|                 |      |                                                                                        |                            |                                       | 870 | High (asset score)   | <b>72.9%</b> | 70-75.9   |                         |
|                 |      |                                                                                        | <b>SES (women) assets,</b> | <b>Low physical activity</b>          | 106 | Low (asset score)    | <b>66.0%</b> | 54.5-77.4 | 0.084                   |
|                 |      |                                                                                        | <b>housing</b>             | <1.69 MET                             | 143 | Middle (asset score) | <b>73.5%</b> | 66.0-81.0 |                         |
|                 |      |                                                                                        |                            |                                       | 359 | High (asset score)   | <b>76.5%</b> | 72-81     |                         |
|                 |      |                                                                                        |                            |                                       |     |                      |              |           | no adjustment described |

**Dewi et al. (2010)** - Funded by Provincial Health Office of Yogyakarta Special Regency, Indonesia

|                 |          |                                                  |                            |              |                                         |                      |            |  |  |
|-----------------|----------|--------------------------------------------------|----------------------------|--------------|-----------------------------------------|----------------------|------------|--|--|
| cross-sectional | moderate | Representative sample of residents of Yogyakarta | <b>Income (male) 15-35</b> | <b>years</b> | <b>Low fruit &amp; vegetable intake</b> | Low (< mean income)  | <b>85%</b> |  |  |
| 3,285           |          |                                                  |                            |              | <4.5 portions/day                       | High (> mean income) | <b>78%</b> |  |  |

|           |                  |                            |                                         |                      |            |  |
|-----------|------------------|----------------------------|-----------------------------------------|----------------------|------------|--|
| Indonesia | Aged 15-75 years |                            |                                         |                      |            |  |
|           |                  | <b>35-54 years</b>         |                                         | Low (<mean income)   | <b>83%</b> |  |
|           |                  |                            |                                         | High (> mean income) | <b>79%</b> |  |
|           |                  | <b>55-75 years</b>         |                                         | Low (<mean income)   | <b>85%</b> |  |
|           |                  |                            |                                         | High (> mean income) | <b>76%</b> |  |
|           |                  | <b>Income (female) 15-</b> |                                         |                      |            |  |
|           |                  | <b>35 years</b>            | <b>Low fruit &amp; vegetable intake</b> | Low (<mean income)   | <b>84%</b> |  |
|           |                  |                            | <4.5 portions/day                       | High (> mean income) | <b>76%</b> |  |
|           |                  | <b>35-54 years</b>         |                                         | Low (<mean income)   | <b>84%</b> |  |
|           |                  |                            |                                         | High (> mean income) | <b>75%</b> |  |
|           |                  | <b>55-75 years</b>         |                                         | Low (<mean income)   | <b>83%</b> |  |
|           |                  |                            |                                         | High (> mean income) | <b>78%</b> |  |

no adjustment described

**Mumu et al. (2014)** - Source of funding not reported

|                 |          |                                                                                         |                  |                                                        |              |       |
|-----------------|----------|-----------------------------------------------------------------------------------------|------------------|--------------------------------------------------------|--------------|-------|
| cross-sectional | moderate | Type 2 diabetics who had been diagnosed for >1 year from 9 health centres around Dhaka. |                  |                                                        |              |       |
| 374             |          | Aged >20 years                                                                          |                  |                                                        |              |       |
|                 |          |                                                                                         | <b>Education</b> | <b>Smoker (continues)</b>                              |              |       |
|                 |          |                                                                                         |                  | still smoking despite medical advice to quit           |              |       |
|                 |          |                                                                                         |                  | 112 Low (up to primary)                                | <b>6.3%</b>  | 0.541 |
|                 |          |                                                                                         |                  | 174 Medium (up to higher secondary)                    | <b>4.6%</b>  |       |
|                 |          |                                                                                         |                  | 88 High (graduate and above)                           | <b>8.0%</b>  |       |
|                 |          |                                                                                         | <b>Education</b> | <b>Unhealthy diet</b>                                  |              |       |
|                 |          |                                                                                         |                  | non-adherence to recommended diet and quantity of food |              |       |
|                 |          |                                                                                         |                  | 112 Low (up to primary)                                | <b>93.8%</b> | 0.076 |
|                 |          |                                                                                         |                  | 174 Medium (up to higher secondary)                    | <b>85.1%</b> |       |
|                 |          |                                                                                         |                  | 88 High (graduate and above)                           | <b>86.4%</b> |       |
|                 |          |                                                                                         | <b>Education</b> | <b>Sedentary</b>                                       |              |       |
|                 |          |                                                                                         |                  | <30 mins planned exercise/day                          |              |       |
|                 |          |                                                                                         |                  | 112 Low (up to primary)                                | <b>26.8%</b> | 0.654 |
|                 |          |                                                                                         |                  | 174 Medium (up to higher secondary)                    | <b>22.4%</b> |       |
|                 |          |                                                                                         |                  | 88 High (graduate and above)                           | <b>26.1%</b> |       |

no adjustment described

**Dhungana et al. (2014)** - Source of funding not reported

|                 |      |                                           |              |                                 |               |       |
|-----------------|------|-------------------------------------------|--------------|---------------------------------|---------------|-------|
| cross-sectional | high | Rural community in the Sindhuli district. | <b>Caste</b> | <b>Low fruit and vegetables</b> |               |       |
| 406             |      | Aged 20-50 years                          |              | <400g/day                       |               |       |
| Nepal           |      |                                           |              | High (Brahman/Chhetri)          | <b>100.0%</b> | 0.014 |
|                 |      |                                           |              | Middle (Adhibasi/Janajati)      | <b>94.5%</b>  |       |
|                 |      |                                           |              | Low (Dalits)                    | <b>100.0%</b> |       |

|  |  |                                            |                                              |                                 |              |       |
|--|--|--------------------------------------------|----------------------------------------------|---------------------------------|--------------|-------|
|  |  | <b>Education</b>                           | <b>Low fruit and vegetables</b><br><400g/day | Low (No formal education)       | <b>97.9%</b> | 0.32  |
|  |  |                                            |                                              | Middle-low (lower than primary) | <b>93.1%</b> |       |
|  |  |                                            |                                              | Middle-high (primary)           | <b>97.2%</b> |       |
|  |  |                                            |                                              | High (Secondary and higher)     | <b>95.5%</b> |       |
|  |  | <b>SES (education, occupation, income)</b> | <b>Low fruit and vegetables</b><br><400g/day | Lowest                          | <b>96.7%</b> | 0.001 |
|  |  |                                            |                                              | Middle-low                      | <b>98.9%</b> |       |
|  |  |                                            |                                              | Middle-high                     | <b>96.9%</b> |       |
|  |  |                                            |                                              | Highest                         | <b>81.2%</b> |       |
|  |  |                                            |                                              | no adjustment described         |              |       |

**Babalola et al. (2011)** - Source of funding not reported

|                 |          |                         |                           |                                                                                                                        |       |                |       |
|-----------------|----------|-------------------------|---------------------------|------------------------------------------------------------------------------------------------------------------------|-------|----------------|-------|
| cross-sectional | moderate | Semi-urban community in | <b>Years of education</b> | <b>Unhealthy diet</b><br>more processed food, foods of animal origin, sugar and fat                                    | Years | <b>0.8088*</b> | <0.01 |
| 192             |          | Nigeria                 |                           |                                                                                                                        |       |                |       |
| Nigeria         |          | Age not reported        | <b>Average income</b>     | <b>Unhealthy diet</b><br>more processed food, foods of animal origin, sugar and fat                                    | NGN   | <b>0.1796*</b> | <0.01 |
|                 |          |                         |                           |                                                                                                                        |       |                |       |
|                 |          |                         |                           | *Standardised coefficient from logit regression for determinants of incidence of nutrition transition (unhealthy diet) |       |                |       |

**Bunker et al. (1996)** - Funded by the National Institute of Health

|                 |          |                              |                        |                                             |                  |              |       |
|-----------------|----------|------------------------------|------------------------|---------------------------------------------|------------------|--------------|-------|
| cross-sectional | moderate | Civil servants selected from | <b>SES (seniority)</b> | <b>Meat</b><br>mean grams/day               | 113 Senior staff | <b>50.4g</b> | <0.05 |
| 713             |          | 3 different sites at three   |                        |                                             | 163 Junior staff | <b>33.3g</b> |       |
| Nigeria         |          | time periods: 1988, 1990 and | <b>SES (seniority)</b> | <b>Fish</b><br>mean grams/day               | 113 Senior staff | <b>54.5g</b> | <0.05 |
|                 |          | 1992. This data from the     |                        |                                             | 163 Junior staff | <b>69.8g</b> |       |
|                 |          | 1992 Benin wave.             | <b>SES (seniority)</b> | <b>Milk</b><br>any intake in previous 24h   | 113 Senior staff | <b>34.4%</b> | <0.05 |
|                 |          | Aged 25-54 years             |                        |                                             | 163 Junior staff | <b>16.7%</b> |       |
|                 |          |                              | <b>SES (seniority)</b> | <b>Eggs</b><br>any intake in previous 24h   | 113 Senior staff | <b>21.3%</b> | >0.05 |
|                 |          |                              |                        |                                             | 163 Junior staff | <b>15.4%</b> |       |
|                 |          |                              | <b>SES (seniority)</b> | <b>Carbohydrates</b><br>% of total calories | 113 Senior staff | <b>67.2%</b> | >0.05 |
|                 |          |                              |                        |                                             | 163 Junior staff | <b>66.6%</b> |       |

|                            |                                             |                  |               |        |
|----------------------------|---------------------------------------------|------------------|---------------|--------|
| <b>SES (seniority)</b>     | <b>Fat</b><br>% of total calories           | 113 Senior staff | <b>22.5%</b>  | >0.05  |
|                            |                                             | 163 Junior staff | <b>23.1%</b>  |        |
| <b>SES (seniority) men</b> | <b>Meat</b><br>mean grams/day               | 401 Senior staff | <b>50.2g</b>  | >0.05  |
|                            |                                             | 635 Junior staff | <b>40.2g</b>  |        |
| <b>SES (seniority) men</b> | <b>Fish</b><br>mean grams/day               | 401 Senior staff | <b>77.7g</b>  | >0.05  |
|                            |                                             | 635 Junior staff | <b>78.7g</b>  |        |
| <b>SES (seniority) men</b> | <b>Milk</b><br>any intake in previous 24h   | 401 Senior staff | <b>9.50%</b>  | >0.05  |
|                            |                                             | 635 Junior staff | <b>6.50%</b>  |        |
| <b>SES (seniority) men</b> | <b>Eggs</b><br>any intake in previous 24h   | 401 Senior staff | <b>16.80%</b> | <0.05  |
|                            |                                             | 635 Junior staff | <b>7.40%</b>  |        |
| <b>SES (seniority) men</b> | <b>Carbohydrates</b><br>% of total calories | 401 Senior staff | <b>66.20%</b> | <0.001 |
|                            |                                             | 635 Junior staff | <b>69.10%</b> |        |
| <b>SES (seniority) men</b> | <b>Fat</b><br>% of total calories           | 401 Senior staff | <b>23%</b>    | <0.001 |
|                            |                                             | 635 Junior staff | <b>20.50%</b> |        |

adjusted

**Delise et al. (2012)** - Canadian Institutes of Health Research

|                                 |          |                                                                                                                                                                                                                           |                                   |                                                                                           |                             |               |       |
|---------------------------------|----------|---------------------------------------------------------------------------------------------------------------------------------------------------------------------------------------------------------------------------|-----------------------------------|-------------------------------------------------------------------------------------------|-----------------------------|---------------|-------|
| cross-sectional<br>541<br>Benin | moderate | Adults in good health born in Benin, resident in one of three sites (urban, peri-urban and rural) for >6 months. Exclude those with hypertension, diabetes or heart disease (outcomes of this study).<br>Aged 25-60 years | <b>Education</b>                  | <b>Legumes/nuts</b><br>intake*                                                            | Secondary or higher vs none | <b>0.035</b>  | >0.05 |
|                                 |          |                                                                                                                                                                                                                           | <b>Education</b>                  | <b>Fruits</b><br>intake*                                                                  | Secondary or higher vs none | <b>0.073</b>  | >0.06 |
|                                 |          |                                                                                                                                                                                                                           | <b>Education</b>                  | <b>Vegetables</b><br>intake*                                                              | Secondary or higher vs none | <b>0.17</b>   | <0.01 |
|                                 |          |                                                                                                                                                                                                                           |                                   | <i>*taken from two non-consecutive 24h food recall aided by calibrated local utensils</i> |                             |               |       |
|                                 |          |                                                                                                                                                                                                                           | <b>SES (education, household)</b> | <b>Legumes/nuts</b><br>intake*                                                            | High vs Low (tertiles)      | <b>-0.061</b> | >0.05 |
|                                 |          |                                                                                                                                                                                                                           | <b>SES (see above)</b>            | <b>Fruits</b>                                                                             | High vs Low (tertiles)      | <b>0.043</b>  | >0.05 |

|  |  |  |                        |                                                                                           |  |                        |              |  |       |
|--|--|--|------------------------|-------------------------------------------------------------------------------------------|--|------------------------|--------------|--|-------|
|  |  |  | intake*                |                                                                                           |  |                        |              |  |       |
|  |  |  | <b>SES (see above)</b> | <b>Vegetables intake*</b>                                                                 |  | High vs Low (tertiles) | <b>0.052</b> |  | >0.05 |
|  |  |  |                        | <i>*taken from two non-consecutive 24h food recall aided by calibrated local utensils</i> |  |                        |              |  |       |

adjusted but variables not described

**Nwamarah and Otitoju (2014)** - Source of funding not reported

|                        |     |                                                                                                         |                  |                                        |     |                              |             |           |       |
|------------------------|-----|---------------------------------------------------------------------------------------------------------|------------------|----------------------------------------|-----|------------------------------|-------------|-----------|-------|
| cross-sectional<br>170 | low | Elderly and retired staff from the University of Nigeria, 30% below the poverty line.<br>Aged >60 years | <b>Income</b>    | <b>Fruit and vegetable consumption</b> | 52  | Below poverty line (US\$435) | <b>4.21</b> | (SD) 2.31 | 0.02  |
| Nigeria                |     |                                                                                                         |                  | mean servings per week                 | 118 | Above poverty line (US\$435) | <b>5.12</b> | (SD) 1.24 |       |
|                        |     |                                                                                                         | <b>Education</b> | <b>Fruit and vegetable consumption</b> | 13  | Low - lower than tertiary    | <b>3.65</b> | (SD) 1.12 | 0.002 |
|                        |     |                                                                                                         |                  | mean servings per week                 | 157 | High - tertiary              | <b>4.86</b> | (SD) 1.33 |       |

no adjustment described

**Zeba et al. (2014)** - Funded by the Canadian International Development Agency

|                        |      |                                                                                                                                                                      |                    |                                                                           |  |                              |              |           |        |
|------------------------|------|----------------------------------------------------------------------------------------------------------------------------------------------------------------------|--------------------|---------------------------------------------------------------------------|--|------------------------------|--------------|-----------|--------|
| cross-sectional<br>300 | high | Burkinabe born and resident in Ouagadougou for >6 months. Excludes pregnant or lactating women and physically and mentally disabled individuals.<br>Aged 25-60 years | <b>Asset score</b> | <b>Unhealthy diet</b>                                                     |  | Low (tertile score)          | <b>19.1%</b> | 11.1-27.3 | 0.002  |
| Burkina Faso           |      |                                                                                                                                                                      |                    | high in fat, sugar, low in fibre, plant protein and complex carbohydrates |  | Medium (tertile score)       | <b>37.1%</b> | 27.1-47.1 | 0.4    |
|                        |      |                                                                                                                                                                      |                    |                                                                           |  | High (tertile score)         | <b>43.8%</b> | 33.5-54.1 | 0.003  |
|                        |      |                                                                                                                                                                      | <b>Education</b>   | <b>Unhealthy diet</b>                                                     |  | Low (no formal)              | <b>24.7%</b> | 15.8-33.6 | <0.001 |
|                        |      |                                                                                                                                                                      |                    | high in fat, sugar, low in fibre, plant protein and complex carbohydrates |  | Medium (elementary)          | <b>15.7%</b> | 8.2-23.2  | 0.3    |
|                        |      |                                                                                                                                                                      |                    |                                                                           |  | High (High school and above) | <b>59.6%</b> | 49.4-69.8 | <0.001 |

no adjustment described

**Houehanou et al. (2015)** - No external funding

|                          |          |                                                                                         |               |                                                    |       |                                       |              |         |
|--------------------------|----------|-----------------------------------------------------------------------------------------|---------------|----------------------------------------------------|-------|---------------------------------------|--------------|---------|
| cross-sectional<br>5,830 | moderate | Population-based<br>nationally representative<br>2008 STEPS survey.<br>Aged 25-64 years |               |                                                    |       |                                       |              |         |
| Benin                    |          |                                                                                         | <b>Income</b> | <b>Alcohol use</b><br>consume alcohol ≥4 days/week | 3,549 | Lowest (<FCFA 66,000*)                | <b>17.8%</b> | 0.003   |
|                          |          |                                                                                         |               |                                                    | 1,034 | Low (FCFA 66,000-132,000)             | <b>16.5%</b> |         |
|                          |          |                                                                                         |               |                                                    | 565   | Middle (FCFA 132,000-198,000)         | <b>15.9%</b> |         |
|                          |          |                                                                                         |               |                                                    | 378   | High (FCFA 198,000-264,000)           | <b>12.4%</b> |         |
|                          |          |                                                                                         |               |                                                    |       |                                       |              |         |
|                          |          |                                                                                         |               |                                                    |       | *€100 = FCFA 65,657 at time of survey |              |         |
|                          |          |                                                                                         |               |                                                    | 304   | Highest (>FCFA 264,000)               | <b>11.2%</b> |         |
|                          |          |                                                                                         | <b>Income</b> | <b>Fruit and vegetable consumption</b>             | 3,549 | Lowest (<FCFA 66,000*)                | <b>20.2%</b> | <0.0001 |
|                          |          |                                                                                         |               |                                                    |       |                                       |              |         |
|                          |          |                                                                                         |               |                                                    | 1,034 | Low (FCFA 66,000-132,000)             | <b>16.7%</b> |         |
|                          |          |                                                                                         |               |                                                    | 565   | Middle (FCFA 132,000-198,000)         | <b>16.9%</b> |         |
|                          |          |                                                                                         |               |                                                    | 378   | High (FCFA 198,000-264,000)           | <b>10.3%</b> |         |
|                          |          |                                                                                         |               |                                                    |       |                                       |              |         |
|                          |          |                                                                                         |               |                                                    |       | *€100 = FCFA 65,657 at time of survey |              |         |
|                          |          |                                                                                         |               |                                                    | 304   | Highest (>FCFA 264,000)               | <b>16.1%</b> |         |
|                          |          |                                                                                         |               |                                                    |       | no adjustment described               |              |         |

**Al Ali et al. (2011)** - Funded by the National Institute on Drug Abuse; EU grant Mediterranean studies of Cardiovascular disease and Hyperglycaemia

|                 |          |                          |                                                                     |                                     |     |                         |              |           |       |
|-----------------|----------|--------------------------|---------------------------------------------------------------------|-------------------------------------|-----|-------------------------|--------------|-----------|-------|
| cross-sectional | moderate | Representative sample of | <b>Education</b>                                                    | <b>Unhealthy diet</b>               | 351 | Low (<6 years)          | <b>49.1%</b> | 40.5-57.7 | <0.05 |
| 1,168           |          | Aleppo residents from a  |                                                                     | fruit and veg consumed <3 days/week | 509 | Medium (6-11 years)     | <b>34.4%</b> | 30.1-38.9 |       |
| Syria           |          | 2006 survey.             |                                                                     |                                     | 308 | High (>12 years)        | <b>16.4%</b> | 12.6-21.1 |       |
|                 |          | Aged >25 years           |                                                                     |                                     |     |                         |              |           |       |
|                 |          |                          | <b>SES (education,<br/>employment status,<br/>household income)</b> | <b>Unhealthy diet</b><br>see above  | 415 | Low (tertile score)     | <b>49.9%</b> | 43-56.8   | <0.05 |
|                 |          |                          |                                                                     |                                     | 369 | Medium (tertile score)  | <b>30.5%</b> | 25.7-35.8 |       |
|                 |          |                          |                                                                     |                                     | 384 | High (tertile score)    | <b>17.4%</b> | 14-21.5   |       |
|                 |          |                          | <b>Employment</b>                                                   | <b>Unhealthy diet</b>               | 624 | Employed                | <b>27.9%</b> | 22.5-34   | >0.05 |
|                 |          |                          |                                                                     | fruit and veg consumed <3 days/week | 544 | Unemployed              | <b>38.3%</b> | 30.9-46.4 |       |
|                 |          |                          |                                                                     |                                     |     | no adjustment described |              |           |       |

**Badruddin (1994)** - Source of funding not reported

|                 |     |                            |                          |                           |  |                             |                |            |       |
|-----------------|-----|----------------------------|--------------------------|---------------------------|--|-----------------------------|----------------|------------|-------|
| cross-sectional | low | Children from lower-middle | <b>Class (undefined)</b> | <b>Cholesterol intake</b> |  | Age 5-9, lower-middle class | <b>296.9mg</b> | (SD) 134.6 | <0.05 |
|-----------------|-----|----------------------------|--------------------------|---------------------------|--|-----------------------------|----------------|------------|-------|



|          |                                                                                                            |                                                 |                               |                                 |
|----------|------------------------------------------------------------------------------------------------------------|-------------------------------------------------|-------------------------------|---------------------------------|
| 233      | income families with average monthly income US\$115. Selected from two elementary schools. Aged 5-19 years |                                                 |                               |                                 |
| Pakistan |                                                                                                            | mean intake mg/day                              | Age 5-9, upper class          | <b>353.9mg</b> (SD) 159.7       |
|          |                                                                                                            | <b>Cholesterol intake</b><br>mean intake mg/day | Age 10-14, lower-middle class | <b>363.8mg</b> (SD) 152.2 <0.05 |
|          |                                                                                                            |                                                 | Age 10-14, upper class        | <b>469.6mg</b> (SD) 173.4       |
|          |                                                                                                            | <b>Cholesterol intake</b><br>mean intake mg/day | Age 15-19, lower-middle class | <b>318.8mg</b> (SD) 134.3 <0.05 |
|          |                                                                                                            |                                                 | Age 15-19, upper class        | <b>541.7mg</b> (SD) 178.2       |
|          | <b>Class (undefined)</b>                                                                                   | <b>Cholesterol intake</b><br>mean intake mg/day | Age 5-9, lower-middle class   | <b>343.9mg</b> (SD) 175.6 <0.05 |
|          |                                                                                                            |                                                 | Age 5-9, upper class          | <b>486.9mg</b> (SD) 157.1       |
|          |                                                                                                            | <b>Cholesterol intake</b><br>mean intake mg/day | Age 10-14, lower-middle class | <b>275.9mg</b> (SD) 129.8 <0.05 |
|          |                                                                                                            |                                                 | Age 10-14, upper class        | <b>463.7mg</b> (SD) 186.1       |
|          |                                                                                                            | <b>Cholesterol intake</b><br>mean intake mg/day | Age 15-19, lower-middle class | <b>240.9mg</b> (SD) 108.8 <0.05 |
|          |                                                                                                            |                                                 | Age 15-19, upper class        | <b>410.7mg</b> (SD) 191.5       |
|          |                                                                                                            |                                                 | no adjustment described       |                                 |

| Design, n                                                                                | Quality  | Sample                                    | Exposure          | Outcome                      | n     | Exposure subgroup            | Value               | 95% CI                       | p                       |                       |                    |              |              |  |
|------------------------------------------------------------------------------------------|----------|-------------------------------------------|-------------------|------------------------------|-------|------------------------------|---------------------|------------------------------|-------------------------|-----------------------|--------------------|--------------|--------------|--|
| Non peer-reviewed                                                                        |          |                                           |                   |                              |       |                              |                     |                              |                         |                       |                    |              |              |  |
| <b>WHO STEPS Côte d'Ivoire (2007)</b> - Source of funding not reported                   |          |                                           |                   |                              |       |                              |                     |                              |                         |                       |                    |              |              |  |
| cross-sectional                                                                          | moderate | WHO STEPS survey.                         | <b>Education</b>  | <b>Low physical activity</b> | 3,442 | Illiterate                   | <b>86.4%</b>        | 81.2-91.6                    |                         |                       |                    |              |              |  |
| 4,530                                                                                    |          | Aged 15-64 years                          |                   |                              |       | <600 MET mins/week           | Primary             | <b>87.4%</b>                 | 81.7-93.2               |                       |                    |              |              |  |
| Côte d'Ivoire                                                                            |          |                                           |                   |                              |       | Secondary                    | <b>89.3%</b>        | 84.8-93.8                    |                         |                       |                    |              |              |  |
|                                                                                          |          |                                           |                   |                              |       | Higher education             | <b>90.1%</b>        | 85.3-94.8                    |                         |                       |                    |              |              |  |
|                                                                                          |          |                                           |                   |                              |       |                              |                     |                              | no adjustment described |                       |                    |              |              |  |
| <b>WHO STEPS Eritrea (2004)</b> - Funded by WHO, Italian Government, Eritrean Government |          |                                           |                   |                              |       |                              |                     |                              |                         |                       |                    |              |              |  |
| cross-sectional                                                                          | moderate | Nationally representative                 | <b>Education</b>  | <b>Physical inactivity</b>   | 808   | Lowest (no formal education) | <b>10.3%</b>        |                              | 0.066                   |                       |                    |              |              |  |
| 2,033                                                                                    |          | sample, individuals                       |                   |                              |       | 709                          | Low (Grades 1-6)    | <b>8.9%</b>                  |                         |                       |                    |              |              |  |
| Eritrea                                                                                  |          | selected from six zones. Aged 15-64 years |                   |                              |       | 283                          | Middle (Grade 7-8)  | <b>10.2%</b>                 |                         |                       |                    |              |              |  |
|                                                                                          |          |                                           |                   |                              |       | 436                          | High (Grades 9-12)  | <b>11.5%</b>                 |                         |                       |                    |              |              |  |
|                                                                                          |          |                                           |                   |                              |       | 102                          | Highest (>12 years) | <b>11.8%</b>                 |                         |                       |                    |              |              |  |
|                                                                                          |          |                                           |                   |                              |       | 2,338 total                  |                     | <b>10.1%</b>                 |                         |                       |                    |              |              |  |
| no adjustment described                                                                  |          |                                           |                   |                              |       |                              |                     |                              |                         |                       |                    |              |              |  |
| <b>WHO STEPS India (2007)</b> - Funded by World Bank, Indian Government                  |          |                                           |                   |                              |       |                              |                     |                              |                         |                       |                    |              |              |  |
| cross-sectional                                                                          | moderate | WHO STEPS survey in seven                 | <b>Education</b>  | <b>Low physical activity</b> | 6,218 | Illiterate                   | <b>62.2%</b>        |                              |                         |                       |                    |              |              |  |
| 38,064                                                                                   |          | states.                                   |                   |                              |       | <b>Andhra Pradesh</b>        | <600 MET mins/week  | Primary                      | <b>61.3%</b>            |                       |                    |              |              |  |
| India                                                                                    |          | Aged 15-64                                |                   |                              |       |                              | Middle              | <b>64.2%</b>                 |                         |                       |                    |              |              |  |
|                                                                                          |          |                                           |                   |                              |       |                              | Secondary           | <b>73.8%</b>                 |                         |                       |                    |              |              |  |
|                                                                                          |          |                                           |                   |                              |       |                              | Higher Secondary    | <b>81.5%</b>                 |                         |                       |                    |              |              |  |
|                                                                                          |          |                                           |                   |                              |       |                              | College and above   | <b>83.8%</b>                 |                         |                       |                    |              |              |  |
|                                                                                          |          |                                           |                   |                              |       |                              | <b>Education</b>    | <b>Low physical activity</b> | 5,853                   | Illiterate            | <b>29.9%</b>       |              |              |  |
|                                                                                          |          |                                           |                   |                              |       |                              |                     |                              |                         | <b>Madhya Pradesh</b> | <600 MET mins/week | Primary      | <b>34.8%</b> |  |
|                                                                                          |          |                                           |                   |                              |       |                              |                     |                              |                         |                       | Middle             | <b>44.4%</b> |              |  |
|                                                                                          |          |                                           |                   |                              |       |                              |                     |                              |                         |                       | Secondary          | <b>54.7%</b> |              |  |
|                                                                                          |          |                                           | Higher Secondary  | <b>63.2%</b>                 |       |                              |                     |                              |                         |                       |                    |              |              |  |
|                                                                                          |          |                                           | College and above | <b>79.3%</b>                 |       |                              |                     |                              |                         |                       |                    |              |              |  |
|                                                                                          |          |                                           | <b>Education</b>  | <b>Low physical activity</b> | 6,091 | Illiterate                   | <b>75.2%</b>        |                              |                         |                       |                    |              |              |  |

## Physical Activity

|                    |                              |       |                   |              |
|--------------------|------------------------------|-------|-------------------|--------------|
| <b>Maharashtra</b> | <600 MET mins/week           |       | Primary           | <b>75.3%</b> |
|                    |                              |       | Middle            | <b>76.6%</b> |
|                    |                              |       | Secondary         | <b>82.7%</b> |
|                    |                              |       | Higher Secondary  | <b>85.8%</b> |
|                    |                              |       | College and above | <b>93.8%</b> |
| <b>Education</b>   | <b>Low physical activity</b> | 4,495 | Illiterate        | <b>57.9%</b> |
| <b>Mizoram</b>     | <600 MET mins/week           |       | Primary           | <b>52.0%</b> |
|                    |                              |       | Middle            | <b>62.7%</b> |
|                    |                              |       | Secondary         | <b>77.7%</b> |
|                    |                              |       | Higher Secondary  | <b>87.3%</b> |
|                    |                              |       | College and above | <b>91.4%</b> |
| <b>Education</b>   | <b>Low physical activity</b> | 4,859 | Illiterate        | <b>63.8%</b> |
| <b>Kerala</b>      | <600 MET mins/week           |       | Primary           | <b>59.6%</b> |
|                    |                              |       | Middle            | <b>63.7%</b> |
|                    |                              |       | Secondary         | <b>74.5%</b> |
|                    |                              |       | Higher Secondary  | <b>84.9%</b> |
|                    |                              |       | College and above | <b>89.8%</b> |
| <b>Education</b>   | <b>Low physical activity</b> | 5,105 | Illiterate        | <b>55.9%</b> |
| <b>Tamil Nadu</b>  | <600 MET mins/week           |       | Primary           | <b>57.6%</b> |
|                    |                              |       | Middle            | <b>62.4%</b> |
|                    |                              |       | Secondary         | <b>70.1%</b> |
|                    |                              |       | Higher Secondary  | <b>77.9%</b> |
|                    |                              |       | College and above | <b>84.5%</b> |
| <b>Education</b>   | <b>Low physical activity</b> | 5,443 | Illiterate        | <b>57.0%</b> |
| <b>Uttarakhand</b> | <600 MET mins/week           |       | Primary           | <b>57.3%</b> |
|                    |                              |       | Middle            | <b>63.5%</b> |
|                    |                              |       | Secondary         | <b>67.1%</b> |
|                    |                              |       | Higher Secondary  | <b>78.4%</b> |
|                    |                              |       | College and above | <b>89.2%</b> |

no adjustment described

**Kinra et al. (2010)** - Funded by the Wellcome Trust

| Study Design                      | SES                            | Sample Description                                                                                               | Physical Activity Measure          | Sample Size                        | SES Category         | Prevalence        | Age Range | CI        |       |  |
|-----------------------------------|--------------------------------|------------------------------------------------------------------------------------------------------------------|------------------------------------|------------------------------------|----------------------|-------------------|-----------|-----------|-------|--|
| cross-sectional<br>1,983<br>India | SES (men) assets,<br>housing   | Nationally representative<br>sample of rural inhabitants<br>from 1600 villages in 18 states.<br>Aged 20-69 years | Low physical activity<br><1.69 MET | 147                                | Low (asset score)    | 65.2%             | 57.5-72.9 | 0.11      |       |  |
|                                   |                                |                                                                                                                  |                                    | 358                                | Middle (asset score) | 72.4%             | 67.8-77   |           |       |  |
|                                   |                                |                                                                                                                  |                                    | 870                                | High (asset score)   | 72.9%             | 70-75.9   |           |       |  |
|                                   | SES (women) assets,<br>housing |                                                                                                                  |                                    | Low physical activity<br><1.69 MET | 106                  | Low (asset score) | 66.0%     | 54.5-77.4 | 0.084 |  |
|                                   | 143                            |                                                                                                                  |                                    |                                    | Middle (asset score) | 73.5%             | 66.0-81.0 |           |       |  |
|                                   | 359                            |                                                                                                                  |                                    |                                    | High (asset score)   | 76.5%             | 72-81     |           |       |  |

adjusted for age

**Gupta et al. (2003)** - Source of funding not reported

| Study Design                    | SES               | Sample Description                                                                                                                        | Physical Activity Measure                             | Sample Size                                           | SES Category              | Prevalence                | Age Range | CI    |       |  |
|---------------------------------|-------------------|-------------------------------------------------------------------------------------------------------------------------------------------|-------------------------------------------------------|-------------------------------------------------------|---------------------------|---------------------------|-----------|-------|-------|--|
| cross-sectional<br>573<br>India | Education (men)   | Serial cross-sectional surveys<br>from the general population of<br>Jaipur. Data taken from the most<br>recent round.<br>Age not reported | Physical Inactivity<br>Leisure time physical activity | 103                                                   | Low (no formal education) | 89.3%                     |           | 0.016 |       |  |
|                                 |                   |                                                                                                                                           |                                                       | 182                                                   | Middle-low (1-10 years)   | 64.3%                     |           |       |       |  |
|                                 |                   |                                                                                                                                           |                                                       | 202                                                   | Middle-high (11-15 years) | 50.5%                     |           |       |       |  |
|                                 |                   |                                                                                                                                           |                                                       | 63                                                    | High (>16 years)          | 42.9%                     |           |       |       |  |
|                                 | Education (women) |                                                                                                                                           |                                                       | Physical Inactivity<br>Leisure time physical activity | 213                       | Low (no formal education) | 89.2%     |       | 0.038 |  |
|                                 | 163               |                                                                                                                                           |                                                       |                                                       | Middle-low (1-10 years)   | 58.9%                     |           |       |       |  |
|                                 | 161               |                                                                                                                                           |                                                       |                                                       | Middle-high (11-15 years) | 39.8%                     |           |       |       |  |
|                                 | 36                |                                                                                                                                           |                                                       |                                                       | High (>16 years)          | 33.3%                     |           |       |       |  |

adjusted for age

**Singh et al. (2000)** - Sandoz (Novartis) Foundation of Gerontologic Research (AUS); World Health Federation

| Study Design                      | SES                                                           | Sample Description                                                 | Physical Activity Measure                                              | Sample Size | SES Category | Prevalence | Age Range | CI    |
|-----------------------------------|---------------------------------------------------------------|--------------------------------------------------------------------|------------------------------------------------------------------------|-------------|--------------|------------|-----------|-------|
| cross-sectional<br>3,257<br>India | SES (education,<br>occupation,<br>income, assets,<br>housing) | Representative female sample<br>from 5 cities. Aged 25-64<br>years | Sedentary<br>Indian classification of<br>activities (occupational, hou | 985         | High         | 92.2%      |           | <0.01 |
|                                   |                                                               |                                                                    |                                                                        | 790         | Medium-high  | 71.4%      |           |       |
|                                   |                                                               |                                                                    |                                                                        | 774         | Medium       | 42.3%      |           |       |
|                                   |                                                               |                                                                    |                                                                        | 602         | Medium-low   | 14.9%      |           |       |
|                                   |                                                               |                                                                    |                                                                        | 206         | Low          | 8.7%       |           |       |

## Physical Activity

**Singh et al. (1997)** - Source of funding not reported

|                                   |      |                                                                     |                                                                 |                             |     |                                                       |                             |       |             |               |       |
|-----------------------------------|------|---------------------------------------------------------------------|-----------------------------------------------------------------|-----------------------------|-----|-------------------------------------------------------|-----------------------------|-------|-------------|---------------|-------|
| cross-sectional<br>1,767<br>India | high | Residents of two villages in rural north India.<br>Aged 25-64 years | <b>SES (men) education, occupation, income, assets, housing</b> | <b>Sedentary lifestyle*</b> | 147 | High                                                  | <b>44.20%</b>               | <0.05 |             |               |       |
|                                   |      |                                                                     |                                                                 |                             | 147 | Middle-high                                           | <b>34.60%</b>               |       |             |               |       |
|                                   |      |                                                                     |                                                                 |                             | 287 | Middle-low                                            | <b>3.50%</b>                |       |             |               |       |
|                                   |      |                                                                     |                                                                 |                             | 313 | Low                                                   | <b>not reported</b>         |       |             |               |       |
|                                   |      |                                                                     |                                                                 |                             |     | <b>education, occupation, income, assets, housing</b> | <b>Sedentary lifestyle*</b> | 115   | High        | <b>13%</b>    | <0.01 |
|                                   |      |                                                                     |                                                                 |                             |     |                                                       |                             | 112   | Middle-high | <b>58%</b>    |       |
|                                   |      |                                                                     |                                                                 |                             |     |                                                       |                             | 313   | Middle-low  | <b>20.40%</b> |       |
|                                   |      |                                                                     |                                                                 |                             |     |                                                       |                             | 335   | Low         | <b>4.40%</b>  |       |

\*walk <14.5km/week, climb <20flights stairs or no moderate activity 5 days/week

no adjustment described

**Zaman et al. (2012)** - Funded by the Byrraju Foundation and the Initiative for Cardiovascular Health Research in Developing Countries

|                                   |          |                                                                                   |                           |                            |                              |                          |                           |        |
|-----------------------------------|----------|-----------------------------------------------------------------------------------|---------------------------|----------------------------|------------------------------|--------------------------|---------------------------|--------|
| cross-sectional<br>4,535<br>India | moderate | Representative sample from 20 villages in rural Andhra Pradesh.<br>Aged >30 years | <b>Education (men)</b>    | <b>Physical inactivity</b> | 1,311                        | High (primary or higher) | <b>33.2%</b>              | <0.001 |
|                                   |          |                                                                                   |                           |                            | reports 'almost none' during | 895                      | Low (no formal education) |        |
|                                   |          |                                                                                   | <b>Education (women)</b>  | <b>Physical inactivity</b> | 1,074                        | High (primary or higher) | <b>61.6%</b>              | <0.001 |
|                                   |          |                                                                                   |                           |                            | reports 'almost none' during | 1,255                    | Low (no formal education) |        |
|                                   |          |                                                                                   | <b>Occupation (men)</b>   | <b>Physical inactivity</b> | 434                          | Skilled*                 | <b>46.3%</b>              | <0.001 |
|                                   |          |                                                                                   |                           |                            | reports 'almost none' during | 1,501                    | Unskilled                 |        |
|                                   |          |                                                                                   | <b>Occupation (women)</b> | <b>Physical inactivity</b> | 88                           | Skilled*                 | <b>51.4%</b>              | <0.001 |
|                                   |          |                                                                                   |                           |                            | reports 'almost none' during | 872                      | Unskilled                 |        |

\*skilled manual labour, owner of business/farmer office worker/non-professional or professional)

## Physical Activity

|                         |                       |                              |                                  |              |        |
|-------------------------|-----------------------|------------------------------|----------------------------------|--------------|--------|
|                         | <b>Income (men)</b>   | <b>Physical inactivity</b>   | 912 High (>2000 INR/month)       | <b>34.1%</b> | <0.001 |
|                         |                       | reports 'almost none' during | 717 Middle (1200-1999 INR/month) | <b>21.4%</b> |        |
|                         |                       |                              | 577 Low (0-1199 INR/month)       | <b>30.5%</b> |        |
|                         | <b>Income (women)</b> | <b>Physical inactivity</b>   | 945 High (>2000 INR/month)       | <b>57.3%</b> | <0.001 |
|                         |                       | reports 'almost none' during | 550 Middle (1200-1999 INR/month) | <b>50.4%</b> |        |
|                         |                       |                              | 834 Low (0-1199 INR/month)       | <b>54.3%</b> |        |
| no adjustment described |                       |                              |                                  |              |        |

**Gupta et al. (2012)** - Funded by the South Asian Society of Atherosclerosis and Thrombosis

|                          |      |                                                                                                                                                 |                            |                                     |                              |                                    |              |  |  |
|--------------------------|------|-------------------------------------------------------------------------------------------------------------------------------------------------|----------------------------|-------------------------------------|------------------------------|------------------------------------|--------------|--|--|
| cross-sectional          | high | General population in middle-class areas of 11 cities, excluded house-bound, pregnant and those likely to die within 6 months. Aged 18-75 years | <b>Education</b>           | <b>Low physical activity</b>        | 1,248 Low (0-10 years)       | <b>37.2%</b>                       |              |  |  |
| 6,198                    |      |                                                                                                                                                 |                            | no regular work-related or l        | 2,956 Middle (11-15 years)   | <b>45.5%</b>                       |              |  |  |
| India                    |      |                                                                                                                                                 |                            |                                     | 1,366 High (>15 years)       | <b>35.5%</b>                       |              |  |  |
|                          |      |                                                                                                                                                 |                            | <b>Occupational Class</b>           | <b>Low physical activity</b> | 1,287 Low (4-5)                    | <b>47.4%</b> |  |  |
|                          |      |                                                                                                                                                 |                            | (British Social Register, see above |                              | 1,677 Middle (3 manual/non-manual) | <b>43.7%</b> |  |  |
|                          |      |                                                                                                                                                 |                            | housewife = husband)                |                              | 3,018 High (1-2 )                  | <b>39.1%</b> |  |  |
|                          |      |                                                                                                                                                 | <b>SES (self-assessed)</b> | <b>Low physical activity</b>        | 374 Low (score 1-3)          | <b>42.3%</b>                       |              |  |  |
|                          |      |                                                                                                                                                 |                            | no regular work-related or l        | 3,622 Middle (score 4-6)     | <b>40.1%</b>                       |              |  |  |
|                          |      |                                                                                                                                                 |                            |                                     | 1,114 High ( score 7-10)     | <b>36.9%</b>                       |              |  |  |
| adjusted for age and sex |      |                                                                                                                                                 |                            |                                     |                              |                                    |              |  |  |

**Reddy et al. (2007)** - Funded by the Indian Ministry of Health; WHO

|                 |      |                                                                                             |                        |                                |                                        |                                        |            |         |        |
|-----------------|------|---------------------------------------------------------------------------------------------|------------------------|--------------------------------|----------------------------------------|----------------------------------------|------------|---------|--------|
| cross-sectional | high | Industrial workers and their relatives from ten urban sites across India. Aged 20-69 years. | <b>Education (men)</b> | <b>Physical activity</b>       | 1,611 High (postgraduate)              | <b>1</b>                               | OR         | <0.001  |        |
| 19,969          |      |                                                                                             |                        | leisure time physical activity | 2,607 Middle-high (secondary-tertiary) | <b>0.9</b>                             | 0.8-1.1    |         |        |
| India           |      |                                                                                             |                        |                                | 5,820 Middle-low (primary-secondary)   | <b>0.7</b>                             | 0.6-0.8    |         |        |
|                 |      |                                                                                             |                        |                                | 1,859 Low (none-primary)               | <b>0.2</b>                             | 0.18-0.25  |         |        |
|                 |      |                                                                                             |                        | <b>Education (women)</b>       | <b>Physical activity</b>               | 1,611 High (postgraduate)              | <b>1</b>   | OR      | <0.001 |
|                 |      |                                                                                             |                        |                                | leisure time physical activity         | 2,607 Middle-high (secondary-tertiary) | <b>0.9</b> | 0.7-1.1 |        |

## Physical Activity

|       |                                |            |         |
|-------|--------------------------------|------------|---------|
| 5,820 | Middle-low (primary-secondary) | <b>0.6</b> | 0.5-0.8 |
| 1,859 | Low (none-primary)             | <b>0.3</b> | 0.2-0.4 |

adjusted for age, occupation

**Kar et al. (2010)** - Source of funding not reported

|                        |          |                                                            |                 |                  |     |            |            |         |     |
|------------------------|----------|------------------------------------------------------------|-----------------|------------------|-----|------------|------------|---------|-----|
| cross-sectional<br>400 | moderate | Residents at eight sites in Northern India. Aged >30 years | <b>Literacy</b> | <b>Sedentary</b> | 226 | Literate   | <b>1.3</b> | 0.7-2.5 | 0.5 |
| India                  |          |                                                            |                 |                  | 177 | Illiterate | <b>1</b>   | OR      |     |

adjusted for age, sex, literacy, place of residence

**Anjana (2014)** - Indian Council of Medical Research

|                                    |          |                                                                                              |                                            |                                                |                                                                                                          |                                                            |        |
|------------------------------------|----------|----------------------------------------------------------------------------------------------|--------------------------------------------|------------------------------------------------|----------------------------------------------------------------------------------------------------------|------------------------------------------------------------|--------|
| cross-sectional<br>14,227<br>India | moderate | Data from Indian council of medical research-India diabetes (ICMR-INDAB). Aged >20 years old | <b>Income</b>                              | <b>Inactive</b><br><600 MET minutes/week       | Low (below median)<br>High (above median)                                                                | <b>42.0%</b><br><b>58.0%</b>                               | <0.001 |
|                                    |          |                                                                                              | <b>Income</b>                              | <b>Highly active</b><br>>1200 MET minutes/week | Low (below median)<br>High (above median)                                                                | <b>62.7%</b><br><b>37.3%</b>                               | <0.001 |
|                                    |          |                                                                                              | <b>Education</b>                           | <b>Inactive</b><br><600 MET minutes/week       | Low (Illiterate)<br>Middle-low (primary/secondary)<br>Middle-high (Undergraduate)<br>High (Postgraduate) | <b>28.6%</b><br><b>61.2%</b><br><b>8.8%</b><br><b>1.3%</b> | <0.001 |
|                                    |          |                                                                                              | <b>Education</b>                           | <b>Highly active</b><br>>1200 MET minutes/week | Low (Illiterate)<br>Middle-low (primary/secondary)<br>Middle-high (Undergraduate)<br>High (Postgraduate) | <b>39.1%</b><br><b>57.1%</b><br><b>3.5%</b><br><b>0.3%</b> | <0.001 |
|                                    |          |                                                                                              | <b>SES (education, occupation, income)</b> | <b>Inactive</b><br><600 MET minutes/week       | Low (Score <11/29)<br>Middle (Score 11-25/29)<br>High (Score 25-29/29)                                   | <b>11.2%</b><br><b>26.5%</b><br><b>62.3%</b>               | <0.001 |

## Physical Activity

|                         |  | SES (education, occupation, income) | Highly active<br>>1200 MET minutes/week | Low (Score <11/29)<br>Middle (Score 11-25/29)<br>High (Score 25-29/29) | 21.9%<br>38.8%<br>39.3% | <0.001 |
|-------------------------|--|-------------------------------------|-----------------------------------------|------------------------------------------------------------------------|-------------------------|--------|
| no adjustment described |  |                                     |                                         |                                                                        |                         |        |

**Anjana et al. (2015)** - Funded by Lilly Diabetes; International Diabetes Federation; Global Health Institute at Emory University

|                                             |          |                                                                                                                                                                                                                                                                               |                                                  |                                            |                                                   |                |       |
|---------------------------------------------|----------|-------------------------------------------------------------------------------------------------------------------------------------------------------------------------------------------------------------------------------------------------------------------------------|--------------------------------------------------|--------------------------------------------|---------------------------------------------------|----------------|-------|
| cross-sectional                             | moderate | Obese and overweight individuals with high blood sugar but not diagnosed with diabetes. Pregnant women and seriously unwell excluded. Participants southern India from baseline survey from D-CLIP (diabetes community lifestyle improvement program). Age range not reported | <b>Income</b>                                    | <b>Active</b><br>>150 mins/week exercise   | High (INR >25000/month)<br>Low (INR <25000/month) | 41.0%<br>59.0% | <0.05 |
| 1,281                                       |          |                                                                                                                                                                                                                                                                               | <b>Income</b>                                    | <b>Inactive</b><br><150 mins/week exercise | High (INR >25000/month)<br>Low (INR <25000/month) | 29.2%<br>70.1% |       |
| India                                       |          |                                                                                                                                                                                                                                                                               | <i>variables; age, gender, education, income</i> |                                            |                                                   |                |       |
|                                             |          |                                                                                                                                                                                                                                                                               | <b>Education</b>                                 | <b>Active</b><br>>150 mins/week exercise   | High (Graduate)<br>Lower (Non-graduate)           | 68.8%<br>31.2% | <0.05 |
|                                             |          |                                                                                                                                                                                                                                                                               | <b>Education</b>                                 | <b>Inactive</b><br><150 mins/week exercise | High (Graduate)<br>Lower (Non-graduate)           | 60.0%<br>40.0% |       |
| adjusted for age, gender, education, income |          |                                                                                                                                                                                                                                                                               |                                                  |                                            |                                                   |                |       |

**Safraj et al. (2012)** - No external funding

|                 |          |                                                          |                               |                                                                  |                       |       |
|-----------------|----------|----------------------------------------------------------|-------------------------------|------------------------------------------------------------------|-----------------------|-------|
| cross-sectional | moderate | PROFILE cohort - rural Keralan adults.<br>Aged >20 years | <b>SES (assets, services)</b> | <b>Sedentary</b><br>Leisure and occupation phy:                  | 9,557 Highest (SEP\$) | 17.1% |
| 74,147          |          |                                                          |                               |                                                                  | 23,468 Upper Middle   | 15.2% |
|                 |          |                                                          |                               |                                                                  | 32,577 Lowe Middle    | 8.7%  |
| India           |          |                                                          |                               |                                                                  | 8,545 Lowest          | 4.7%  |
|                 |          |                                                          | <b>SES (assets, services)</b> | <b>Moderate physical activity</b><br>Leisure and occupation phy: | 9,557 Highest (SEP4)  | 10.3% |
|                 |          |                                                          |                               |                                                                  | 23,468 Upper Middle   | 7.8%  |
|                 |          |                                                          |                               |                                                                  | 32,577 Lowe Middle    | 4.2%  |
|                 |          |                                                          |                               |                                                                  | 8,545 Lowest          | 2.7%  |
|                 |          |                                                          | <b>SES (assets, services)</b> | <b>Heavy physical activity</b><br>Leisure and occupation phy:    | 9,557 Highest (SEP4)  | 5.7%  |
|                 |          |                                                          |                               |                                                                  | 23,468 Upper Middle   | 3.3%  |
|                 |          |                                                          |                               |                                                                  | 32,577 Lowe Middle    | 3.7%  |



|                                                                                                         |          |                                 |                              | 8,545                                        | Lowest                              | 1.0% |              |        |
|---------------------------------------------------------------------------------------------------------|----------|---------------------------------|------------------------------|----------------------------------------------|-------------------------------------|------|--------------|--------|
| no adjustment described                                                                                 |          |                                 |                              |                                              |                                     |      |              |        |
| <b>Dewi et al. (2010)</b> - Funded by Provincial Health Office of Yogyakarta Special Regency, Indonesia |          |                                 |                              |                                              |                                     |      |              |        |
| cross-sectional                                                                                         | moderate | Representative sample of        | <b>Income (male) 15-35</b>   |                                              |                                     |      |              |        |
|                                                                                                         |          |                                 | <b>years</b>                 | <b>Inactivity</b>                            | Low (<mean income)                  |      | <b>38%</b>   |        |
| 3,285                                                                                                   |          | residents of Yogyakarta.        |                              | <105 mins active time/week                   | High (> mean income)                |      | <b>37%</b>   |        |
| Indonesia                                                                                               |          | Aged 15-75 years                | <b>35-54 years</b>           |                                              | Low (<mean income)                  |      | <b>23%</b>   |        |
|                                                                                                         |          |                                 |                              |                                              | High (> mean income)                |      | <b>36%</b>   |        |
|                                                                                                         |          |                                 | <b>55-75 years</b>           |                                              | Low (<mean income)                  |      | <b>29%</b>   |        |
|                                                                                                         |          |                                 |                              |                                              | High (> mean income)                |      | <b>33%</b>   |        |
|                                                                                                         |          |                                 | <b>Income (female) 15-35</b> |                                              |                                     |      |              |        |
|                                                                                                         |          |                                 | <b>years</b>                 | <b>Inactivity</b>                            | Low (<mean income)                  |      | <b>33%</b>   |        |
|                                                                                                         |          |                                 |                              | <105 mins active time/week                   | High (> mean income)                |      | <b>43%</b>   |        |
|                                                                                                         |          |                                 | <b>35-54 years</b>           |                                              | Low (<mean income)                  |      | <b>27%</b>   |        |
|                                                                                                         |          |                                 |                              |                                              | High (> mean income)                |      | <b>42%</b>   |        |
|                                                                                                         |          |                                 | <b>55-75 years</b>           |                                              | Low (<mean income)                  |      | <b>38%</b>   |        |
|                                                                                                         |          |                                 |                              |                                              | High (> mean income)                |      | <b>31%</b>   |        |
| no adjustment described                                                                                 |          |                                 |                              |                                              |                                     |      |              |        |
| <b>Mumu et al. (2014)</b> - Source of funding not reported                                              |          |                                 |                              |                                              |                                     |      |              |        |
| cross-sectional                                                                                         | moderate | Type 2 diabetics who had been   |                              |                                              |                                     |      |              |        |
| 374                                                                                                     |          | diagnosed for >1 year from 9    |                              |                                              |                                     |      |              |        |
|                                                                                                         |          | health centres around Dhaka.    |                              |                                              |                                     |      |              |        |
|                                                                                                         |          | Aged >20 years                  | <b>Education</b>             | <b>Sedentary</b>                             | 112 Low (up to primary)             |      | <b>26.8%</b> | 0.654  |
| Bangladesh                                                                                              |          |                                 |                              | <30 mins planned exercise/week               | 174 Medium (up to higher secondary) |      | <b>22.4%</b> |        |
|                                                                                                         |          |                                 |                              |                                              | 88 High (graduate and above)        |      | <b>26.1%</b> |        |
| no adjustment described                                                                                 |          |                                 |                              |                                              |                                     |      |              |        |
| <b>Dhungana et al. (2014)</b> - Source of funding not reported                                          |          |                                 |                              |                                              |                                     |      |              |        |
| cross-sectional                                                                                         | high     | Rural community in the Sindhuli | <b>Caste</b>                 | <b>Insufficient physical activity</b>        | High (Brahman/Chhetri)              |      | <b>47.5%</b> | 0.06   |
| 406                                                                                                     |          | district.                       |                              | <150 minutes moderate physical activity/week | Middle (Adhibasi/Janajati)          |      | <b>51.6%</b> |        |
| Nepal                                                                                                   |          | Aged 20-50 years                |                              |                                              | Low (Dalits)                        |      | <b>28.6%</b> |        |
|                                                                                                         |          |                                 | <b>Education</b>             | <b>Insufficient physical activity</b>        | Low (No formal education)           |      | <b>45.7%</b> | 0.0286 |
|                                                                                                         |          |                                 |                              | <150 minutes moderate physical activity/week | Middle-low (lower than primary)     |      | <b>37.9%</b> |        |

## Physical Activity

|                         |  |                                            |                                              |                             |              |     |
|-------------------------|--|--------------------------------------------|----------------------------------------------|-----------------------------|--------------|-----|
|                         |  |                                            |                                              | Middle-high (primary)       | <b>50.0%</b> |     |
|                         |  |                                            |                                              | High (Secondary and higher) | <b>61.4%</b> |     |
|                         |  | <b>SES (education, occupation, income)</b> | <b>Insufficient physical activity</b>        | Lowest                      | <b>54.1%</b> | 0.8 |
|                         |  |                                            | <150 minutes moderate physical activity/week | Middle-low                  | <b>42.6%</b> |     |
|                         |  |                                            |                                              | Middle-high                 | <b>50.0%</b> |     |
|                         |  |                                            |                                              | Highest                     | <b>62.5%</b> |     |
| no adjustment described |  |                                            |                                              |                             |              |     |

**Vaidya and Krettek (2014)** - Funded by the Wilhelm & Martina Lundgren's Foundation; University of Gothenburg

|                                                         |          |                                                                   |                          |                                                                  |                              |               |             |           |
|---------------------------------------------------------|----------|-------------------------------------------------------------------|--------------------------|------------------------------------------------------------------|------------------------------|---------------|-------------|-----------|
| cross-sectional                                         | moderate | Adults from six peri-urban sites near Kathmandu. Aged 25-59 years | <b>Education (men)</b>   | <b>Adequate physical activity</b><br>mins vigorous exercise/week | High (highschool or above)   | <b>68.50%</b> | 55.9-81     |           |
| 640                                                     |          |                                                                   |                          |                                                                  | Medium-high (secondary)      | <b>86.40%</b> | 86.4-94.3   |           |
| Nepal                                                   |          |                                                                   |                          |                                                                  | Medium-low (primary)         | <b>87.80%</b> | 80.3-95.3   |           |
|                                                         |          |                                                                   |                          |                                                                  | Low (informal)               | <b>81.50%</b> | 66.5-96.4   |           |
|                                                         |          |                                                                   | <b>Education (women)</b> | <b>Adequate physical activity</b><br>mins vigorous exercise/week | High (highschool or more)    | <b>67.10%</b> | 56-78.2     |           |
|                                                         |          |                                                                   |                          |                                                                  | Medium-high (secondary)      | <b>77.40%</b> | 70-84.8     |           |
|                                                         |          |                                                                   |                          |                                                                  | Medium-low (primary)         | <b>80.80%</b> | 74.9-86.7   |           |
|                                                         |          |                                                                   |                          |                                                                  | Low (informal)               | <b>80.20%</b> | 74.4-86     |           |
|                                                         |          |                                                                   | <b>Education</b>         | <b>Median MET mins/week</b><br>minutes and unadjusted odds       | 94 High (highschool or more) | <b>218m</b>   | <b>2.99</b> | 1.65-5.46 |
|                                                         |          |                                                                   |                          |                                                                  | 165 Medium-high (secondary)  | <b>482m</b>   | <b>1.42</b> | 0.86-2.32 |
|                                                         |          |                                                                   |                          |                                                                  | 208 Medium-low (primary)     | <b>613m</b>   | <b>0.86</b> | 0.55-1.33 |
|                                                         |          |                                                                   |                          |                                                                  | 173 Low (informal)           | <b>600m</b>   | <b>1</b>    | OR        |
| adjusted for age, sex, occupation, education, ethnicity |          |                                                                   |                          |                                                                  |                              |               |             |           |

**Katulanda et al. (2013)** - Funded by the National Science Foundation (SL); Diabetes Endocrinology and Metabolism (UK); National Institute for Health Research (UK)

|                         |          |                                                                                                                                  |                        |                                                   |                               |                        |       |  |
|-------------------------|----------|----------------------------------------------------------------------------------------------------------------------------------|------------------------|---------------------------------------------------|-------------------------------|------------------------|-------|--|
| cross-sectional         | moderate | 2005/6 population-based sample excluding institutionalised individuals and those from the war-torn northern zone. Aged >18 years | <b>Education</b>       | <b>Physical activity</b><br>Mean MET minutes/week | 267 Low (no formal education) | <b>5279m</b> (SD) 5376 |       |  |
| 4,485                   |          |                                                                                                                                  |                        |                                                   | 809 Medium-low (primary)      | <b>5284m</b> (SD) 5004 | <0.01 |  |
| Sri Lanka               |          |                                                                                                                                  |                        |                                                   | 3,379 Medium-high (secondary) | <b>4608m</b> (SD) 4127 | <0.01 |  |
|                         |          |                                                                                                                                  |                        |                                                   | 129 High (tertiary)           | <b>2248m</b> (SD) 2297 | <0.01 |  |
| no adjustment described |          |                                                                                                                                  |                        |                                                   |                               |                        |       |  |
|                         |          |                                                                                                                                  | <b>Education (men)</b> | <b>Physical activity</b>                          | Low (no formal education)     | <b>5940m</b> (SD) 6094 |       |  |

## Physical Activity

|                                                                                                                                                                                                            |                                    |                                      |              |           |        |
|------------------------------------------------------------------------------------------------------------------------------------------------------------------------------------------------------------|------------------------------------|--------------------------------------|--------------|-----------|--------|
|                                                                                                                                                                                                            | Mean MET minutes/week              | Low (no formal education)            | <b>6844m</b> | (SD) 6246 | <0.01  |
|                                                                                                                                                                                                            |                                    | Medium-low (primary)                 | <b>5309m</b> | (SD) 5252 | <0.01  |
|                                                                                                                                                                                                            |                                    | Medium-high (secondary)              | <b>2284m</b> | (SD) 2655 | <0.01  |
|                                                                                                                                                                                                            |                                    | no adjustment described              |              |           |        |
| <b>Education (women)</b>                                                                                                                                                                                   | <b>Physical activity</b>           | Low (no formal education)            | <b>5103m</b> | (SD) 5170 | <0.01  |
|                                                                                                                                                                                                            | Mean MET minutes/week              | Medium-low (primary)                 | <b>4335m</b> | (SD) 3770 | <0.01  |
|                                                                                                                                                                                                            |                                    | Medium-high (secondary)              | <b>4128m</b> | (SD) 3038 | <0.01  |
|                                                                                                                                                                                                            |                                    | High (tertiary)                      | <b>2197m</b> | (SD) 1678 | <0.01  |
|                                                                                                                                                                                                            |                                    | no adjustment described              |              |           |        |
| <b>Education</b>                                                                                                                                                                                           | <b>Physical activity</b>           | 267 Low (no formal education)        | <b>1</b>     | OR        |        |
|                                                                                                                                                                                                            | active vs inactive*                | 809 Medium-low (primary)             | <b>0.9</b>   | 0.7-1.3   | >0.05  |
|                                                                                                                                                                                                            |                                    | 3,379 Medium-high (secondary)        | <b>1.1</b>   | 0.8-1.5   | >0.05  |
|                                                                                                                                                                                                            |                                    | 129 High (tertiary)                  | <b>3.6</b>   | 2.2-6.0   | <0.001 |
|                                                                                                                                                                                                            |                                    | adjusted but variables not described |              |           |        |
|                                                                                                                                                                                                            | Positive value= inactive correlate |                                      |              |           |        |
| <i>*using IPAQ definition: less than 3 days vigorous activity for 20 mins; less than 5 days of 30 mins moderate activity and/or walking 30 mins per day; less than 600 MET mins/week from any activity</i> |                                    |                                      |              |           |        |
| <b>Education (men)</b>                                                                                                                                                                                     | <b>Physical activity</b>           | Low (no formal education)            | <b>1</b>     | OR        |        |
|                                                                                                                                                                                                            | active vs inactive*                | Medium-low (primary)                 | <b>0.8</b>   | 0.4-1.5   | >0.05  |
|                                                                                                                                                                                                            |                                    | Medium-high (secondary)              | <b>1.1</b>   | 0.6-2.1   | >0.05  |
|                                                                                                                                                                                                            |                                    | High (tertiary)                      | <b>2.8</b>   | 1.2-6.6   | <0.001 |
|                                                                                                                                                                                                            |                                    | adjusted but variables not described |              |           |        |
|                                                                                                                                                                                                            | Positive value= inactive correlate |                                      |              |           |        |
| <i>*using IPAQ definition: less than 3 days vigorous activity for 20 mins; less than 5 days of 30 mins moderate activity and/or walking 30 mins per day; less than 600 MET mins/week from any activity</i> |                                    |                                      |              |           |        |
| <b>Education (women)</b>                                                                                                                                                                                   | <b>Physical activity</b>           | Low (no formal education)            | <b>1</b>     | OR        |        |
|                                                                                                                                                                                                            | active vs inactive*                | Medium-low (primary)                 | <b>1.1</b>   | 0.8-1.5   | >0.05  |
|                                                                                                                                                                                                            |                                    | Medium-high (secondary)              | <b>1.1</b>   | 0.8-1.6   | >0.05  |
|                                                                                                                                                                                                            |                                    | High (tertiary)                      | <b>4.4</b>   | 2.2-8.9   | <0.001 |
|                                                                                                                                                                                                            |                                    | adjusted but variables not described |              |           |        |
|                                                                                                                                                                                                            | Positive value= inactive correlate |                                      |              |           |        |
| <i>*using IPAQ definition: less than 3 days vigorous activity for 20 mins; less than 5 days of 30 mins moderate activity and/or walking 30 mins per day; less than 600 MET mins/week from any activity</i> |                                    |                                      |              |           |        |

**Sossa et al. (2013)** - Funded by the Canadian International Development Agency

|                         |          |                                                                                                |                        |                                                     |                   |                           |  |
|-------------------------|----------|------------------------------------------------------------------------------------------------|------------------------|-----------------------------------------------------|-------------------|---------------------------|--|
| cohort<br>208<br>Benin  | moderate | Healthy adults sampled<br>from a large city, small<br>town and rural area.<br>Aged 25-60 years | <b>Education</b>       | <b>Sedentary</b><br>minutes/day                     | High school       | <b>126.6m</b> (+/-) 13.1  |  |
|                         |          |                                                                                                |                        |                                                     | Primary schooling | <b>97.2m</b> (+/-) 84.4   |  |
|                         |          |                                                                                                |                        |                                                     | No Schooling      | <b>126.6m</b> (+/-) 103.1 |  |
|                         |          |                                                                                                | <b>Education</b>       | <b>Vigorous or moderate activity</b><br>minutes/day | High school       | <b>140.7m</b> (+/-) 146.8 |  |
|                         |          |                                                                                                |                        |                                                     | Primary schooling | <b>185.5m</b> (+/-) 151.4 |  |
|                         |          |                                                                                                |                        |                                                     | No Schooling      | <b>199.4m</b> (+/-) 166.7 |  |
|                         |          |                                                                                                | <b>Wealth (assets)</b> | <b>Sedentary</b><br>minutes/day                     | High              | <b>127.4m</b> (+/-) 102.8 |  |
|                         |          |                                                                                                |                        |                                                     | Medium            | <b>107.9m</b> (+/-) 93.9  |  |
|                         |          |                                                                                                |                        |                                                     | Low               | <b>71.8m</b> (+/-) 67.3   |  |
|                         |          |                                                                                                | <b>Wealth (assets)</b> | <b>Vigorous or moderate activity</b><br>minutes/day | High              | <b>110.7m</b> (+/-) 121.6 |  |
|                         |          |                                                                                                |                        |                                                     | Medium            | <b>180.8m</b> (+/-) 160.4 |  |
|                         |          |                                                                                                |                        |                                                     | Low               | <b>216.9m</b> (+/-) 160.7 |  |
| no adjustment described |          |                                                                                                |                        |                                                     |                   |                           |  |

**Rahlenbeck and Gebre-Yohannes (1998)** - Funded by the Ethiopian Science and Technology Commission resources

|                         |     |                                                                                                                      |                          |                                                         |                          |            |       |
|-------------------------|-----|----------------------------------------------------------------------------------------------------------------------|--------------------------|---------------------------------------------------------|--------------------------|------------|-------|
| cross-sectional<br>66   | low | Medical students at Gondar<br>college in north-west Ethiopia.<br>Age range not reported (mean<br>20.8 years, SD=1.6) |                          |                                                         |                          |            |       |
| Ethiopia                |     |                                                                                                                      | <b>Income (parental)</b> | <b>Sedentary lifestyle</b><br><2h/week moderate or <1h, | 17 High (>US\$150/month) | <b>18%</b> | 0.421 |
|                         |     |                                                                                                                      |                          |                                                         | 49 Low (<US\$150/month)  | <b>10%</b> |       |
| no adjustment described |     |                                                                                                                      |                          |                                                         |                          |            |       |

**Bunker et al. (1996)** - Funded by the National Institute of Health

|                                   |          |                                                                                                                                                                |                              |                                                 |                  |                   |        |
|-----------------------------------|----------|----------------------------------------------------------------------------------------------------------------------------------------------------------------|------------------------------|-------------------------------------------------|------------------|-------------------|--------|
| cross-sectional<br>713<br>Nigeria | moderate | Civil servants selected from<br>3 different sites at three<br>time periods: 1988, 1990 and<br>1992. This data from the<br>1992 Benin wave.<br>Aged 25-54 years | <b>SES (seniority) men</b>   | <b>Physical activity</b><br>minutes/day walking | 401 Senior staff | <b>20.2m</b>      | <0.001 |
|                                   |          |                                                                                                                                                                |                              |                                                 | 635 Junior staff | <b>29.3m</b>      |        |
|                                   |          |                                                                                                                                                                | <b>SES (seniority) men</b>   | <b>Physical activity</b><br>METS/week           | 401 Senior staff | <b>86 METS</b>    | <0.001 |
|                                   |          |                                                                                                                                                                |                              |                                                 | 635 Junior staff | <b>111.5 METS</b> |        |
|                                   |          |                                                                                                                                                                | <b>SES (seniority) women</b> | <b>Physical activity</b>                        | 157 Senior staff | <b>16.2m</b>      | <0.001 |

## Physical Activity

|  |                              |                          |     |              |                 |       |
|--|------------------------------|--------------------------|-----|--------------|-----------------|-------|
|  |                              | mins/day walking         | 234 | Junior staff | <b>25.6m</b>    |       |
|  | <b>SES (seniority) women</b> | <b>Physical activity</b> | 157 | Senior staff | <b>9.6 METS</b> | >0.05 |
|  |                              | METS/week                | 234 | Junior staff | <b>8.5 METS</b> |       |

no adjustment described

**Oyewole et al. (2014)** - Source of funding not reported

|                 |     |          |                                                                                                             |                |                  |                                   |                               |              |      |
|-----------------|-----|----------|-------------------------------------------------------------------------------------------------------------|----------------|------------------|-----------------------------------|-------------------------------|--------------|------|
| cross-sectional | 122 | moderate | Diabetics recruited from a local clinic, excluded acutely unwell, the aged, amputations, visual impairment. | Aged >20 years |                  |                                   |                               |              |      |
| Nigeria         |     |          |                                                                                                             |                | <b>Education</b> | <b>Inactive</b>                   | Low (illiterate or primary)   | <b>39.6%</b> | 0.16 |
|                 |     |          |                                                                                                             |                |                  | does not meet WHO recommendation* | Middle (secondary)            | <b>30.0%</b> |      |
|                 |     |          |                                                                                                             |                |                  |                                   | High (diploma or certificate) | <b>19.4%</b> |      |

\*150 min of moderate intensity activity per week, 75 min of vigorous intensity <150 mins moderate activity/week, or an equivalent combination of moderate and vigorous intensity activity

no adjustment described

**Zeba et al. (2014)** - Funded by the Canadian International Development Agency

|                 |     |      |                                                                                                                                                  |                  |                    |                                            |                              |              |                 |
|-----------------|-----|------|--------------------------------------------------------------------------------------------------------------------------------------------------|------------------|--------------------|--------------------------------------------|------------------------------|--------------|-----------------|
| cross-sectional | 330 | high | Burkinabe born and resident in Ouagadougou for >6 months. Excludes pregnant or lactating women and physically and mentally disabled individuals. | Aged 25-60 years |                    |                                            |                              |              |                 |
| Burkina Faso    |     |      |                                                                                                                                                  |                  | <b>Asset score</b> | <b>Physical activity</b>                   | Low (tertile score)          | <b>5.3h</b>  | (SD) 2.7 <0.001 |
|                 |     |      |                                                                                                                                                  |                  |                    | mean hours of physical activity equivalent | Medium (tertile score)       | <b>4.3h</b>  | (SD) 2.2        |
|                 |     |      |                                                                                                                                                  |                  |                    |                                            | High (tertile score)         | <b>3.4h</b>  | (SD) 1.6        |
|                 |     |      |                                                                                                                                                  |                  | <b>Asset score</b> | <b>Sedentary time</b>                      | Low (tertile score)          | <b>10.7h</b> | (SD) 3.3 <0.001 |
|                 |     |      |                                                                                                                                                  |                  |                    | mean hours of sedentary time equivalent    | Medium (tertile score)       | <b>11.4h</b> | (SD) 3.1        |
|                 |     |      |                                                                                                                                                  |                  |                    |                                            | High (tertile score)         | <b>12.4h</b> | (SD) 2.8        |
|                 |     |      |                                                                                                                                                  |                  | <b>Education</b>   | <b>Physical activity</b>                   | Low (no formal)              | <b>4.8h</b>  | (SD) 2.4 0.002  |
|                 |     |      |                                                                                                                                                  |                  |                    | mean hours of physical activity equivalent | Medium (elementary)          | <b>4.6h</b>  | (SD) 2.5        |
|                 |     |      |                                                                                                                                                  |                  |                    |                                            | High (High school and above) | <b>3.8h</b>  | (SD) 2.1        |
|                 |     |      |                                                                                                                                                  |                  | <b>Education</b>   | <b>Sedentary time</b>                      | Low (no formal)              | <b>11.1h</b> | (SD) 3.2 0.251  |
|                 |     |      |                                                                                                                                                  |                  |                    | mean hours of sedentary time equivalent    | Medium (elementary)          | <b>11.6h</b> | (SD) 3.1        |
|                 |     |      |                                                                                                                                                  |                  |                    |                                            | High (High school and above) | <b>11.7h</b> | (SD) 3.0        |

## Physical Activity

no adjustment described

**Oanh et al. (2008)** - Funded by Atlantic Philanthropies

|                                     |                       |                                                                              |                        |                                                             |                         |                                 |              |                       |  |
|-------------------------------------|-----------------------|------------------------------------------------------------------------------|------------------------|-------------------------------------------------------------|-------------------------|---------------------------------|--------------|-----------------------|--|
| cross-sectional<br>1,776<br>Vietna, | high                  | Representative STEPS<br>survey from Ho Chi Minh<br>city.<br>Aged 25-64 years | <b>Education</b>       | <b>Insufficient physical activity</b><br><600 MET mins/week | less than primary       | <b>1</b> OR, p for trend <0.001 |              |                       |  |
|                                     |                       |                                                                              |                        |                                                             | primary completed       | <b>0.88</b> 0.56-1.37           |              |                       |  |
|                                     |                       |                                                                              |                        |                                                             | secondary completed     | <b>0.93</b> 0.55-1.56           |              |                       |  |
|                                     |                       |                                                                              |                        |                                                             | high school completed   | <b>1.09</b> 0.68-1.75           |              |                       |  |
|                                     |                       |                                                                              |                        |                                                             |                         |                                 | some college | <b>1.32</b> 0.63-2.76 |  |
|                                     |                       |                                                                              | <b>Income</b>          | <b>Insufficient physical activity</b><br><600 MET mins/week | VND <1,000,000/month    | <b>1</b> OR, p for trend <0.001 |              |                       |  |
|                                     |                       |                                                                              |                        |                                                             | VND 1,000,000-3,000,000 | <b>1.42</b> 1.02-2              | <0.05        |                       |  |
|                                     |                       |                                                                              |                        |                                                             | VND 3,000,000-5,000,000 | <b>1.51</b> 0.94-2.43           |              |                       |  |
|                                     |                       |                                                                              |                        |                                                             | VND >5,000,000          | <b>1.77</b> 1.05-2.79           | <0.05        |                       |  |
|                                     |                       |                                                                              | <b>Wealth (assets)</b> | <b>Insufficient physical activity</b><br><600 MET mins/week | Lowest                  | <b>1</b> OR, p for trend <0.001 |              |                       |  |
|                                     |                       |                                                                              |                        |                                                             | Second                  | <b>1.29</b> 0.9-1.84            |              |                       |  |
|                                     |                       |                                                                              |                        |                                                             | Middle                  | <b>1.67</b> 1.26-2.21           | <0.05        |                       |  |
| Fourth                              | <b>1.87</b> 1.15-3.04 | <0.05                                                                        |                        |                                                             |                         |                                 |              |                       |  |
| Highest                             | <b>1.86</b> 1.29-2.66 | <0.05                                                                        |                        |                                                             |                         |                                 |              |                       |  |

adjusted for age group, sex, ethnicity, education, occupation, household SES, tobacco use, alcohol consumption

**Hosey et al. (2014)** - Funded by Uniformed Services University of the Health Sciences

|                                           |          |                                                                                            |                          |                                                                                 |                                    |                       |       |
|-------------------------------------------|----------|--------------------------------------------------------------------------------------------|--------------------------|---------------------------------------------------------------------------------|------------------------------------|-----------------------|-------|
| cross-sectional<br>1,638<br>FS Micronesia | moderate | WHO STEPwise survey using<br>randomly selected<br>households in Pohnpei.<br><br>Aged 25-64 | <b>Education (men)</b>   | Sedentary<br><30 mins/day of moderate<br>activity on 5 or more days<br>per week | 99 High (Post-secondary >13years)  | <b>0.5</b> 0.28-0.88  | 0.025 |
|                                           |          |                                                                                            |                          |                                                                                 | 183 Medium (Secondary, 9-12 years) | <b>1.01</b> 0.63-1.64 |       |
|                                           |          |                                                                                            |                          |                                                                                 | 315 Low (Primary <9 years)         | <b>1</b> OR           |       |
|                                           |          |                                                                                            | <b>Education (women)</b> | Sedentary                                                                       | 99 High (Post-secondary >13years)  | <b>0.65</b> 0.22-1.94 | 0.258 |
|                                           |          |                                                                                            |                          |                                                                                 | 183 Medium (Secondary, 9-12 years) | <b>0.68</b> 0.42-1.11 |       |
|                                           |          |                                                                                            |                          |                                                                                 | 315 Low (Primary <9 years)         | <b>1</b> OR           |       |

no adjustment described

**Abd-Elhady et al. (2007)** - Source of funding not reported

## Physical Activity

|                        |     |                                                                         |                  |                         |                        |              |  |
|------------------------|-----|-------------------------------------------------------------------------|------------------|-------------------------|------------------------|--------------|--|
| cross-sectional<br>283 | low | Diabetic patients attending Alf-Maskan outpatient clinic in East Cairo. |                  |                         |                        |              |  |
| Egypt                  |     | Age not reported                                                        | <b>Education</b> | <b>No exercise</b>      | 78 high (undefined)    | <b>74.0%</b> |  |
|                        |     |                                                                         |                  | undefined               | 160 medium             | <b>70.6%</b> |  |
|                        |     |                                                                         |                  |                         | 45 low (illiterate)    | <b>73.3%</b> |  |
|                        |     |                                                                         | <b>Education</b> | <b>Regular exercise</b> | 78 High (undefined)    | <b>11.5%</b> |  |
|                        |     |                                                                         |                  | undefined               | 160 Medium (undefined) | <b>8.1%</b>  |  |
|                        |     |                                                                         |                  |                         | 45 Low (Illiterate)    | <b>6.7%</b>  |  |

no adjustment described

**Al Ali et al. (2011)** - Funded by the National Institute on Drug Abuse; EU grant Mediterranean studies of Cardiovascular disease and Hyperglycaemia

|                          |          |                                                  |                                                                     |                            |                            |              |                 |
|--------------------------|----------|--------------------------------------------------|---------------------------------------------------------------------|----------------------------|----------------------------|--------------|-----------------|
| cross-sectional<br>1,168 | moderate | Representative sample of Aleppo residents from a |                                                                     |                            |                            |              |                 |
| Syria                    |          | 2006 survey.<br>Aged >25 years                   | <b>Education</b>                                                    | <b>Physical inactivity</b> | 351 Low (<6 years)         | <b>89.2%</b> | 84.7-92.5 <0.05 |
|                          |          |                                                  |                                                                     | <1/week sport or ≥15mins t | 509 Medium (6-11 years)    | <b>85.0%</b> | 79.7-89.1       |
|                          |          |                                                  |                                                                     |                            | 308 High (>12 years)       | <b>71.0%</b> | 61.8-78.8       |
|                          |          |                                                  | <b>SES (education, assets, employment status, household income)</b> | <b>Physical inactivity</b> | 415 Low (tertile score)    | <b>90.2%</b> | 85.7-93.4 <0.05 |
|                          |          |                                                  |                                                                     | see above                  | 369 Medium (tertile score) | <b>83.6%</b> | 77-88.6         |
|                          |          |                                                  |                                                                     |                            | 384 High (tertile score)   | <b>71.9%</b> | 66.3-79.2       |
|                          |          |                                                  | <b>Occupation</b>                                                   | <b>Physical inactivity</b> | 624 Employed               | <b>75.5%</b> | 68.3-81.4 <0.05 |
|                          |          |                                                  |                                                                     | <1/week sport or ≥15mins t | 544 Unemployed             | <b>88.3%</b> | 83.6-91.8       |

no adjustment described

| Design, n                                                               | Quality  | Sample                                       | Exposure              | Outcome                     | n     | Exposure subgroup | Value         | 95% CI | p |
|-------------------------------------------------------------------------|----------|----------------------------------------------|-----------------------|-----------------------------|-------|-------------------|---------------|--------|---|
| <b><u>Non-peer reviewed</u></b>                                         |          |                                              |                       |                             |       |                   |               |        |   |
| <b>WHO STEPS India (2007)</b> - Funded by World Bank, Indian Government |          |                                              |                       |                             |       |                   |               |        |   |
| cross-sectional                                                         | moderate | WHO STEPS survey in seven states. Aged 15-64 | <b>Education</b>      | <b>current daily smoker</b> | 6,218 | Illiterate        | <b>23.10%</b> |        |   |
| 38,064                                                                  |          |                                              | <b>Andhra Pradesh</b> |                             |       | Primary           | <b>23.00%</b> |        |   |
| India                                                                   |          |                                              |                       |                             |       | Middle            | <b>16.30%</b> |        |   |
|                                                                         |          |                                              |                       |                             |       | Secondary         | <b>12.50%</b> |        |   |
|                                                                         |          |                                              |                       |                             |       | Higher Secondary  | <b>6.90%</b>  |        |   |
|                                                                         |          |                                              |                       |                             |       | College and above | <b>8.10%</b>  |        |   |
|                                                                         |          |                                              | <b>Education</b>      | <b>current daily smoker</b> | 5,853 | Illiterate        | <b>20.60%</b> |        |   |
|                                                                         |          |                                              | <b>Madhya Pradesh</b> |                             |       | Primary           | <b>37.00%</b> |        |   |
|                                                                         |          |                                              |                       |                             |       | Middle            | <b>24.80%</b> |        |   |
|                                                                         |          |                                              |                       |                             |       | Secondary         | <b>18.70%</b> |        |   |
|                                                                         |          |                                              |                       |                             |       | Higher Secondary  | <b>15.00%</b> |        |   |
|                                                                         |          |                                              |                       |                             |       | College and above | <b>11.60%</b> |        |   |
|                                                                         |          |                                              | <b>Education</b>      | <b>current daily smoker</b> | 6,091 | Illiterate        | <b>12.90%</b> |        |   |
|                                                                         |          |                                              | <b>Maharashtra</b>    |                             |       | Primary           | <b>14.40%</b> |        |   |
|                                                                         |          |                                              |                       |                             |       | Middle            | <b>8.90%</b>  |        |   |
|                                                                         |          |                                              |                       |                             |       | Secondary         | <b>7.60%</b>  |        |   |
|                                                                         |          |                                              |                       |                             |       | Higher Secondary  | <b>7.70%</b>  |        |   |
|                                                                         |          |                                              |                       |                             |       | College and above | <b>7.30%</b>  |        |   |
|                                                                         |          |                                              | <b>Education</b>      | <b>current daily smoker</b> | 4,495 | Illiterate        | <b>50.90%</b> |        |   |
|                                                                         |          |                                              | <b>Mizoram</b>        |                             |       | Primary           | <b>55.40%</b> |        |   |
|                                                                         |          |                                              |                       |                             |       | Middle            | <b>45.80%</b> |        |   |
|                                                                         |          |                                              |                       |                             |       | Secondary         | <b>37.60%</b> |        |   |
|                                                                         |          |                                              |                       |                             |       | Higher Secondary  | <b>39.20%</b> |        |   |
|                                                                         |          |                                              |                       |                             |       | College and above | <b>39.60%</b> |        |   |
|                                                                         |          |                                              | <b>Education</b>      | <b>current daily smoker</b> | 4,859 | Illiterate        | <b>17.70%</b> |        |   |
|                                                                         |          |                                              | <b>Kerala</b>         |                             |       | Primary           | <b>30.10%</b> |        |   |
|                                                                         |          |                                              |                       |                             |       | Middle            | <b>22.20%</b> |        |   |
|                                                                         |          |                                              |                       |                             |       | Secondary         | <b>13.10%</b> |        |   |
|                                                                         |          |                                              |                       |                             |       | Higher Secondary  | <b>4.80%</b>  |        |   |
|                                                                         |          |                                              |                       |                             |       | College and above | <b>6.50%</b>  |        |   |
|                                                                         |          |                                              | <b>Education</b>      | <b>current daily smoker</b> | 5,105 | Illiterate        | <b>14.90%</b> |        |   |



## Tobacco

|  |  |                    |                             |                   |                         |               |  |
|--|--|--------------------|-----------------------------|-------------------|-------------------------|---------------|--|
|  |  | <b>Tamil Nadu</b>  |                             | Primary           |                         | <b>19.70%</b> |  |
|  |  |                    |                             | Middle            |                         | <b>17.30%</b> |  |
|  |  |                    |                             | Secondary         |                         | <b>13.40%</b> |  |
|  |  |                    |                             | Higher Secondary  |                         | <b>7.20%</b>  |  |
|  |  |                    |                             | College and above |                         | <b>5.90%</b>  |  |
|  |  | <b>Education</b>   | <b>current daily smoker</b> | 5,443             | Illiterate              | <b>25.60%</b> |  |
|  |  | <b>Uttarakhand</b> |                             |                   | Primary                 | <b>30.40%</b> |  |
|  |  |                    |                             |                   | Middle                  | <b>21.20%</b> |  |
|  |  |                    |                             |                   | Secondary               | <b>18.60%</b> |  |
|  |  |                    |                             |                   | Higher Secondary        | <b>11.00%</b> |  |
|  |  |                    |                             |                   | College and above       | <b>11.20%</b> |  |
|  |  |                    |                             |                   | No adjustment described |               |  |

**WHO STEPS Côte d'Ivoire (2007)** - Source of funding not reported

|                 |          |                   |                  |                                                                       |       |                         |               |           |
|-----------------|----------|-------------------|------------------|-----------------------------------------------------------------------|-------|-------------------------|---------------|-----------|
| cross-sectional | moderate | WHO STEPS survey. | <b>Education</b> | <b>Current smoker</b>                                                 | 4,491 | Illiterate              | <b>13.40%</b> | 8.2-18.7  |
| 4,530           |          | Aged 15-64 years  |                  | currently smoke tobacco products including cigarettes, cigars & pipes |       | Primary                 | <b>11.50%</b> | 8.7-14.2  |
| Côte d'Ivoire   |          |                   |                  |                                                                       |       | Secondary               | <b>16.50%</b> | 12.8-20.2 |
|                 |          |                   | <b>Education</b> | <b>Daily smoker</b>                                                   | 661   | Illiterate              | <b>34.20%</b> | 24.2-44.3 |
|                 |          |                   |                  | % of current smokers                                                  |       | Primary                 | <b>24.40%</b> | 18.2-30.6 |
|                 |          |                   |                  |                                                                       |       | Secondary               | <b>32.40%</b> | 22.1-42.7 |
|                 |          |                   |                  |                                                                       |       | Higher education        | <b>24.90%</b> | 13.1-36.7 |
|                 |          |                   |                  |                                                                       |       | No adjustment described |               |           |

**WHO STEPS Zambia (2008)** - Funded by Zambian Ministry of Health; WHO

|                 |       |          |                                                                 |                  |                 |                             |             |           |
|-----------------|-------|----------|-----------------------------------------------------------------|------------------|-----------------|-----------------------------|-------------|-----------|
| cross-sectional | 1,928 | moderate | WHO STEPS survey in Lusaka district, 67% female. Aged >25 years | <b>Education</b> | <b>"Smoker"</b> | No formal education         | <b>1</b>    | OR        |
| Zambia          |       |          |                                                                 |                  |                 | Primary completed           | <b>1.12</b> | 0.69-2.09 |
|                 |       |          |                                                                 |                  |                 | Secondary completed         | <b>0.92</b> | 0.58-1.47 |
|                 |       |          |                                                                 |                  |                 | College or higher completed | <b>0.62</b> | 0.36-1.06 |
|                 |       |          |                                                                 |                  |                 | No adjustment described     |             |           |

**Peer-reviewed****Jindal et al. (2006)** - Funded by Indian Council of Medical Research

|                 |     |                          |                        |                   |      |          |    |
|-----------------|-----|--------------------------|------------------------|-------------------|------|----------|----|
| cross-sectional | low | Residents from urban and | <b>SES (undefined)</b> | <b>Cigarettes</b> | High | <b>1</b> | OR |
|-----------------|-----|--------------------------|------------------------|-------------------|------|----------|----|

## Tobacco

|                             |                                              |                                    |          |               |              |
|-----------------------------|----------------------------------------------|------------------------------------|----------|---------------|--------------|
| 73,605                      | rural areas of Bangalore,                    | current or former                  | Medium   | <b>1.281</b>  | 1.123-1.463  |
| India                       | Chandigarh, Delhi,<br>Kanpur. Aged >15 years | cigarette smoker                   | Low      | <b>1.151</b>  | 0.986-1.344  |
|                             | <b>SES (undefined)</b>                       | <b>Bidis</b>                       | High     | <b>1</b>      | OR           |
|                             |                                              | current or former use              | Medium   | <b>3.872</b>  | 3.234-4.529  |
|                             |                                              |                                    | Low      | <b>11.138</b> | 9.365-13.247 |
|                             | <b>SES (undefined)</b>                       | <b>Tobacco smoking</b>             | High     | <b>1</b>      | OR           |
|                             |                                              | any - cigarettes, bidis,<br>hookah | Medium   | <b>2.101</b>  | 1.889-2.336  |
|                             |                                              |                                    | Low      | <b>4.161</b>  | 3.717-4.658  |
| <i>variables; undefined</i> |                                              |                                    | Adjusted |               |              |

**Bonu et al. (2005)** - Source of funding not reported

|                        |      |                                                                                                |                                     |                                                           |              |             |                 |
|------------------------|------|------------------------------------------------------------------------------------------------|-------------------------------------|-----------------------------------------------------------|--------------|-------------|-----------------|
| cross-sectional 22,68! | high | Hospitalised participants<br>of the 1995/6 Indian<br>National Sample Survey.<br>Aged >10 years | <b>Current regular tobacco user</b> | <b>Poverty</b>                                            | Non-user     | <b>1</b>    | OR              |
| India                  |      |                                                                                                |                                     | borrowing/financial<br>distress during<br>hospitalisation | Tobacco user | <b>1.35</b> | 1.11-1.63 <0.01 |

adjusted for head of household, age, sex, level of schooling, marital status, state. number of days of hospitalisation used to control for severity of illness.

**Hashibe et al. (2003)** - Funded by Assoc. Int Cancer Researc; Imperial Cancer Research Fund; National Cancer Institute (USA) & UCLA Jonnson Cancer Center Foundation

|              |      |                                  |                   |                         |                             |               |         |
|--------------|------|----------------------------------|-------------------|-------------------------|-----------------------------|---------------|---------|
| case-control | high | Study examining SES and          | <b>Income</b>     | <b>Tobacco chewing</b>  | Low (INR<1500)              | <b>34.30%</b> |         |
| 47,773       |      | pre-malignant oral lesions<br>in |                   |                         | Middle-low (INR 1500-3000)  | <b>22.90%</b> |         |
| India        |      | Kerala. Data is presented        |                   |                         | Middle-high (INR 3001-5000) | <b>17.00%</b> |         |
|              |      | linking NCD risk factors<br>with |                   |                         | High (INR>5000)             | <b>11.20%</b> | <0.0001 |
|              |      | SES markers for the<br>47,773    | <b>Education</b>  | <b>Tobacco chewing</b>  | Low (None/illiterate)       | <b>48.20%</b> |         |
|              |      | controls only.                   |                   |                         | Middle-low (None/literate)  | <b>45.70%</b> |         |
|              |      | Aged >35 years                   |                   |                         | Middle (Primary)            | <b>33.70%</b> |         |
|              |      |                                  |                   |                         | Middle-high (Middle school) | <b>26.40%</b> |         |
|              |      |                                  |                   |                         | High (>High schools)        | <b>12.40%</b> | <0.0001 |
|              |      |                                  | <b>Occupation</b> | <b>Tobacco chewingh</b> | Manual                      | <b>29.00%</b> |         |

|  |                   |                |  |                             |        |         |
|--|-------------------|----------------|--|-----------------------------|--------|---------|
|  |                   |                |  | Teacher/office              | 10.90% |         |
|  |                   |                |  | Business                    | 21.10% |         |
|  |                   |                |  | Retired                     | 34.90% |         |
|  |                   |                |  | Other                       | 23.80% | <0.0001 |
|  | <b>Income</b>     | <b>Smoking</b> |  | Low (INR<1500)              | 28.80% |         |
|  |                   |                |  | Middle-low (INR 1500-3000)  | 22.90% |         |
|  |                   |                |  | Middle-high (INR 3001-5000) | 20.20% |         |
|  |                   |                |  | High (INR>5000)             | 16.60% | <0.0001 |
|  | <b>Education</b>  | <b>Smoking</b> |  | Low (None/illiterate)       | 19.70% |         |
|  |                   |                |  | Middle-low (None/literate)  | 23.30% |         |
|  |                   |                |  | Middle (Primary)            | 29.40% |         |
|  |                   |                |  | Middle-high (Middle school) | 30.90% |         |
|  |                   |                |  | High (>High schools)        | 23.80% | <0.0001 |
|  | <b>Occupation</b> | <b>Smoking</b> |  | Manual                      | 22.60% |         |
|  |                   |                |  | Teacher/office              | 28.40% |         |
|  |                   |                |  | Business                    | 54.30% |         |
|  |                   |                |  | Retired                     | 40.70% |         |
|  |                   |                |  | Other                       | 52.30% | <0.0001 |
|  |                   |                |  | No adjustment described     |        |         |

**Deepa et al. (2011)** - Source of funding not reported

|        |       |          |                                                  |               |                                        |                                     |               |
|--------|-------|----------|--------------------------------------------------|---------------|----------------------------------------|-------------------------------------|---------------|
| cohort | 1,122 | moderate | Urban residential colonies of Chennai. Aged >20y | <b>Income</b> | <b>Current smokers</b>                 | 526 Middle (INR 5,501-10,000/month) | <b>3%</b>     |
| India  |       |          |                                                  |               | habitual smoker regardless of quantity | 596 Low (INR 2,500-5,500/month)     | <b>12.60%</b> |
|        |       |          |                                                  |               |                                        | No adjustment described             |               |

**Corsi et al. (2014)** - Funded by Byrraju Found; Initiative for CV Health Research in Dev. Countries; National Health and Med Research Council (AUS); the George Found.

|                 |      |                                                                                |                          |                          |                             |               |
|-----------------|------|--------------------------------------------------------------------------------|--------------------------|--------------------------|-----------------------------|---------------|
| cross-sectional | high | Representative sample from 20 villages in rural Andhra Pradesh. Aged >20 years | <b>Education (men)</b>   | <b>Ever smoker</b>       | 2,205 Low (None/Illiterate) | <b>64%</b>    |
| 4,534           |      |                                                                                |                          | current or former smoker | Medium (Primary)            | <b>57.90%</b> |
| India           |      |                                                                                |                          |                          | High (Secondary or higher)  | <b>37.70%</b> |
|                 |      |                                                                                |                          |                          | No adjustment described     |               |
|                 |      |                                                                                | <b>Education (women)</b> | <b>Ever smoker</b>       | 2,329 Low (None/Illiterate) | <b>12.40%</b> |
|                 |      |                                                                                |                          |                          | Medium (Primary)            | <b>3.20%</b>  |
|                 |      |                                                                                |                          |                          | High (Secondary or higher)  | <b>1.10%</b>  |
|                 |      |                                                                                |                          |                          | No adjustment described     |               |

## Tobacco

|  |                       |                       |       |                                           |               |           |       |
|--|-----------------------|-----------------------|-------|-------------------------------------------|---------------|-----------|-------|
|  | <b>Education</b>      | <b>Current smoker</b> | 4,535 | Low (None/Illiterate)                     | <b>3.25</b>   | 2.54-4.16 | <0.01 |
|  |                       |                       |       | Medium (Primary)                          | <b>1.87</b>   | 1.13-2.44 |       |
|  |                       |                       |       | High (Secondary or higher)                | <b>1</b>      | OR        |       |
|  |                       |                       |       | adjusted for age, sex, occupation, income |               |           |       |
|  | <b>Income (men)</b>   | <b>Ever smoker</b>    | 2,205 | Extremely Low (<US\$0.50/day)             | <b>62.20%</b> |           |       |
|  |                       |                       |       | Very Low (\$0.50-1/day)                   | <b>57.50%</b> |           |       |
|  |                       |                       |       | Low (US\$1-2/day)                         | <b>55.90%</b> |           |       |
|  |                       |                       |       | Higher (US\$>2/day)                       | <b>50.70%</b> |           |       |
|  |                       |                       |       | No adjustment described                   |               |           |       |
|  | <b>Income (women)</b> | <b>Ever smoker</b>    | 2,329 | Extremely Low (<US\$0.50/day)             | <b>19.10%</b> |           |       |
|  |                       |                       |       | Very Low (\$0.50-1/day)                   | <b>7.30%</b>  |           |       |
|  |                       |                       |       | Low (US\$1-2/day)                         | <b>7.70%</b>  |           |       |
|  |                       |                       |       | Higher (US\$>2/day)                       | <b>4.30%</b>  |           |       |
|  |                       |                       |       | No adjustment described                   |               |           |       |
|  | <b>Income (men)</b>   | <b>Current smoker</b> | 4,535 | Extremely Low (<US\$0.50/day)             | <b>1.5</b>    | 1.06-2.16 | <0.05 |
|  |                       |                       |       | Very Low (\$0.50-1/day)                   | <b>1.15</b>   | 0.88-1.49 |       |
|  |                       |                       |       | Low (US\$1-2/day)                         | <b>1.12</b>   | 0.89-1.42 |       |
|  |                       |                       |       | Higher (US\$>2/day)                       | <b>1</b>      | OR        |       |
|  |                       |                       |       | adjusted for age, sex, occupation, income |               |           |       |

**Kinra et al. (2010)** - Funded by the Wellcome Trust

|                 |       |      |                                                                                        |                                    |                                                        |     |                      |               |           |        |
|-----------------|-------|------|----------------------------------------------------------------------------------------|------------------------------------|--------------------------------------------------------|-----|----------------------|---------------|-----------|--------|
| cross-sectional | 1,983 | high | Nationally representative sample of rural inhabitants from 1600 villages in 18 states. | <b>SES (men) assets, housing</b>   | <b>Smoker</b>                                          | 147 | Low (asset score)    | <b>36.80%</b> | 29.6-44.1 | <0.001 |
| India           |       |      | Aged 20-69 years                                                                       |                                    | daily tobacco smoking at any time in the last 6 months | 358 | Middle (asset score) | <b>28.10%</b> | 23.5-32.7 |        |
|                 |       |      |                                                                                        |                                    |                                                        | 870 | High (asset score)   | <b>14.70%</b> | 12.3-17.1 |        |
|                 |       |      |                                                                                        | <b>SES (women) assets, housing</b> | <b>Smoker</b>                                          | 106 | Low (asset score)    | <b>1.20%</b>  | 0-2.9     | 0.2    |
|                 |       |      |                                                                                        |                                    |                                                        | 143 | Middle (asset score) | <b>1.10%</b>  | 0-2.6     |        |
|                 |       |      |                                                                                        |                                    |                                                        | 359 | High (asset score)   | <b>0.30%</b>  | 0-0.8     |        |
|                 |       |      |                                                                                        |                                    |                                                        |     | adjusted for age     |               |           |        |

**Neufeld et al. (2005)** - No external funding

|                 |      |                             |                 |                      |        |                           |          |    |
|-----------------|------|-----------------------------|-----------------|----------------------|--------|---------------------------|----------|----|
| cross-sectional | high | Data from the 1995/6 Indian | <b>Poverty*</b> | <b>Smoke tobacco</b> | 303416 | High (above poverty line) | <b>1</b> | OR |
|-----------------|------|-----------------------------|-----------------|----------------------|--------|---------------------------|----------|----|

## Tobacco

|         |                                           |                  |                       |         |                           |            |         |
|---------|-------------------------------------------|------------------|-----------------------|---------|---------------------------|------------|---------|
| 471,143 | National Sample Survey.<br>Aged >10 years |                  | regular use, any form | 167,727 | Low (below poverty line)  | <b>1</b>   | 1-1.1   |
| India   |                                           | <b>Caste**</b>   | <b>Smoke tobacco</b>  | 334,512 | High                      | <b>1</b>   | OR      |
|         |                                           |                  |                       | 136,631 | Low                       | <b>1.4</b> | 1.3-1.5 |
|         |                                           | <b>Education</b> | <b>Smoke tobacco</b>  | 273,069 | High (formal education)   | <b>1</b>   | OR      |
|         |                                           |                  |                       | 188,956 | Low (no formal education) | <b>1.7</b> | 1.6-1.8 |
|         |                                           | <b>Poverty*</b>  | <b>Chew tobacco</b>   | 303,416 | High (above poverty line) | <b>1</b>   | OR      |
|         |                                           |                  | regular use, any form | 167,727 | Low (below poverty line)  | <b>1.5</b> | 1.4-1.6 |
|         |                                           | <b>Caste**</b>   | <b>Chew tobacco</b>   | 334,512 | High                      | <b>1</b>   | OR      |
|         |                                           |                  |                       | 136,631 | Low                       | <b>1.5</b> | 1.4-1.6 |
|         |                                           | <b>Education</b> | <b>Chew tobacco</b>   | 273,069 | High (formal education)   | <b>1</b>   | OR      |
|         |                                           |                  |                       | 188,956 | Low (no formal education) | <b>1.2</b> | 1.1-1.3 |

\*Planning commission of india definition - income required to ensure adequate intake of calories (INR 2,100 urban; INR 2,400 rural)

\*\*Scheduled Castes and tribes - identified in the Indian Constituion as especially disadvantaged or needy

adjusted for age group, gender caste, income, residence, education

**Dixit et al. (2015)** - No external funding

|                 |          |                            |                          |                        |     |                          |               |        |
|-----------------|----------|----------------------------|--------------------------|------------------------|-----|--------------------------|---------------|--------|
| cross-sectional | moderate | Door-to-door survey of     | <b>Education (Men)</b>   | <b>Smoke tobacco</b>   | 274 | Low (No schooling)       | <b>37.50%</b> | <0.001 |
| 1,410           |          | villagers in rural Jaipur. |                          | use smoke/smokeless    | 278 | Medium-low (1-5years)    | <b>33.45%</b> |        |
| India           |          | Aged >18 years             |                          | tobacco prodcut nearly | 237 | Medium-high (6-12 years) | <b>32.91%</b> |        |
|                 |          |                            |                          | every day, or          | 165 | High (>12 years)         | <b>13.93%</b> |        |
|                 |          |                            | <b>Education (Men)</b>   | <b>Chew tobacco</b>    | 274 | Low (No schooling)       | <b>28.46%</b> | <0.001 |
|                 |          |                            |                          |                        | 278 | Medium-low (1-5years)    | <b>17.27%</b> |        |
|                 |          |                            |                          |                        | 237 | Medium-high (6-12 years) | <b>10.97%</b> |        |
|                 |          |                            |                          |                        | 165 | High (>12 years)         | <b>10.30%</b> |        |
|                 |          |                            | <b>Education (Women)</b> | <b>Smoke tobacco</b>   | 176 | Low (No schooling)       | <b>10.97%</b> | 0.06   |
|                 |          |                            |                          |                        | 127 | Medium-low (1-5years)    | <b>4.72%</b>  |        |
|                 |          |                            |                          |                        | 108 | Medium-high (6-12 years) | <b>0%</b>     |        |
|                 |          |                            |                          |                        | 45  | High (>12 years)         | <b>0%</b>     |        |
|                 |          |                            | <b>Education (Women)</b> | <b>Chew tobacco</b>    | 176 | Low (No schooling)       | <b>7.95%</b>  | 0.51   |
|                 |          |                            |                          |                        | 127 | Medium-low (1-5years)    | <b>9.44%</b>  |        |
|                 |          |                            |                          |                        | 108 | Medium-high (6-12 years) | <b>12.96%</b> |        |

|                                                                                                                                                                                                                                                                                                                                                                                                                                            |          |                                                                                                              |                                                             | 45 High (>12 years)                        |                                 | 4.44%         |                   |
|--------------------------------------------------------------------------------------------------------------------------------------------------------------------------------------------------------------------------------------------------------------------------------------------------------------------------------------------------------------------------------------------------------------------------------------------|----------|--------------------------------------------------------------------------------------------------------------|-------------------------------------------------------------|--------------------------------------------|---------------------------------|---------------|-------------------|
|                                                                                                                                                                                                                                                                                                                                                                                                                                            |          |                                                                                                              |                                                             | No adjustment described                    |                                 |               |                   |
| <b>Gupta et al. (2003)</b> - Source of funding not reported                                                                                                                                                                                                                                                                                                                                                                                |          |                                                                                                              |                                                             |                                            |                                 |               |                   |
| cross-sectional 573                                                                                                                                                                                                                                                                                                                                                                                                                        | high     | Serial cross-sectional surveys from the general population of Jaipur. Data taken from the most recent round. | <b>Education (men)</b>                                      | <b>Smoker</b>                              | 103 Low (no formal education)   | <b>54.40%</b> |                   |
| India                                                                                                                                                                                                                                                                                                                                                                                                                                      |          | Age not reported                                                                                             |                                                             | past or present use of any tobacco product | 182 Middle-low (1-10 years)     | <b>42.90%</b> |                   |
|                                                                                                                                                                                                                                                                                                                                                                                                                                            |          |                                                                                                              |                                                             |                                            | 202 Middle-high (11-15 years)   | <b>28.70%</b> |                   |
|                                                                                                                                                                                                                                                                                                                                                                                                                                            |          |                                                                                                              |                                                             |                                            | 63 High (>16 years)             | <b>23.80%</b> |                   |
|                                                                                                                                                                                                                                                                                                                                                                                                                                            |          |                                                                                                              | <b>Education (women)</b>                                    | <b>Smoker</b>                              | 213 Low (no formal education)   | <b>28.20%</b> |                   |
|                                                                                                                                                                                                                                                                                                                                                                                                                                            |          |                                                                                                              |                                                             |                                            | 163 Middle-low (1-10 years)     | <b>3.10%</b>  |                   |
|                                                                                                                                                                                                                                                                                                                                                                                                                                            |          |                                                                                                              |                                                             |                                            | 161 Middle-high (11-15 years)   | <b>0.60%</b>  |                   |
|                                                                                                                                                                                                                                                                                                                                                                                                                                            |          |                                                                                                              |                                                             |                                            | 36 High (>16 years)             | <b>2.80%</b>  |                   |
| adjusted for age                                                                                                                                                                                                                                                                                                                                                                                                                           |          |                                                                                                              |                                                             |                                            |                                 |               |                   |
| <b>Menon et al. (2015)</b> - Source of funding not reported                                                                                                                                                                                                                                                                                                                                                                                |          |                                                                                                              |                                                             |                                            |                                 |               |                   |
| cross-sectional 84,456                                                                                                                                                                                                                                                                                                                                                                                                                     | moderate | Representative sample from Kerala state. Aged >18 years                                                      | <b>Poverty*</b>                                             | <b>Smoker</b>                              | 62,975 Above state poverty line | <b>6.70%</b>  |                   |
| India                                                                                                                                                                                                                                                                                                                                                                                                                                      |          |                                                                                                              |                                                             |                                            | 21,481 Below state poverty line | <b>12.30%</b> |                   |
|                                                                                                                                                                                                                                                                                                                                                                                                                                            |          |                                                                                                              | <b>Poverty*</b>                                             | <b>Smoker</b>                              | 62,975 Above state poverty line | <b>1</b>      | OR                |
|                                                                                                                                                                                                                                                                                                                                                                                                                                            |          |                                                                                                              |                                                             |                                            | 21,481 Below state poverty line | <b>1.94</b>   | 1.84-2.04 <0.0001 |
| *Kerelan government definition: families which meet >4 of the following: no land or less than 5 cents, no house/dilapidated house; no sanitation latrine; no regular employed person in house; no access to safe drinking water; women-headed household or presence of widow or divorce; scheduled class/tribe; mentally retarded or (rural) disabled member in the family; no colour TV (urban) or family with an illiterate adult member |          |                                                                                                              |                                                             |                                            |                                 |               |                   |
| No adjustment described                                                                                                                                                                                                                                                                                                                                                                                                                    |          |                                                                                                              |                                                             |                                            |                                 |               |                   |
| <b>Singh et al. (2000)</b> - Sandoz (Novartis) Foundation of Gerontologic Research (AUS); World Health Federation                                                                                                                                                                                                                                                                                                                          |          |                                                                                                              |                                                             |                                            |                                 |               |                   |
| cross-sectional 3,257                                                                                                                                                                                                                                                                                                                                                                                                                      | low      | Representative female sample from 5 cities. Aged 25-64 years                                                 | <b>SES (education, occupation, income, assets, housing)</b> | <b>Use tobacco</b>                         | 985 High                        | <b>8.10%</b>  | 0.09              |
| India                                                                                                                                                                                                                                                                                                                                                                                                                                      |          |                                                                                                              |                                                             | uses tobacco >1/week                       | 790 Medium-high                 | <b>5.90%</b>  |                   |
|                                                                                                                                                                                                                                                                                                                                                                                                                                            |          |                                                                                                              |                                                             |                                            | 774 Medium                      | <b>6.70%</b>  |                   |
|                                                                                                                                                                                                                                                                                                                                                                                                                                            |          |                                                                                                              |                                                             |                                            | 602 Medium-low                  | <b>7.90%</b>  |                   |
|                                                                                                                                                                                                                                                                                                                                                                                                                                            |          |                                                                                                              |                                                             |                                            | 206 Low                         | <b>8.70%</b>  |                   |
| No adjustment described                                                                                                                                                                                                                                                                                                                                                                                                                    |          |                                                                                                              |                                                             |                                            |                                 |               |                   |
| <b>Singh et al. (2000)</b> - Sandoz (Novartis) Foundation of Gerontologic Research (AUS); World Health Federation                                                                                                                                                                                                                                                                                                                          |          |                                                                                                              |                                                             |                                            |                                 |               |                   |

## Tobacco

|                         |       |      |                                                 |                                                             |                      |                 |              |      |
|-------------------------|-------|------|-------------------------------------------------|-------------------------------------------------------------|----------------------|-----------------|--------------|------|
| cross-sectional         | 1,767 | high | Residents of two villages in rural north India. | <b>SES (education, occupation, income, assets, housing)</b> | <b>Use tobacco</b>   | 985 High        | <b>8.10%</b> | 0.09 |
|                         |       |      | Aged 25-64 years                                |                                                             | uses tobacco >1/week | 790 Medium-high | <b>5.90%</b> |      |
| India                   |       |      |                                                 |                                                             |                      | 774 Medium      | <b>6.70%</b> |      |
|                         |       |      |                                                 |                                                             |                      | 602 Medium-low  | <b>7.90%</b> |      |
|                         |       |      |                                                 |                                                             |                      | 206 Low         | <b>8.70%</b> |      |
| No adjustment described |       |      |                                                 |                                                             |                      |                 |              |      |

**Zaman et al. (2012)** - Funded by the Byrraju Foundation and the Initiative for Cardiovascular Health Research in Developing Countries

|                                                                                                         |       |          |                                                                                |                           |                                           |                                  |               |        |
|---------------------------------------------------------------------------------------------------------|-------|----------|--------------------------------------------------------------------------------|---------------------------|-------------------------------------------|----------------------------------|---------------|--------|
| cross-sectional                                                                                         | 4,535 | moderate | Representative sample from 20 villages in rural Andhra Pradesh. Aged >30 years | <b>Education (men)</b>    | <b>Smoker</b>                             | 1,311 High (primary or higher)   | <b>39.50%</b> | <0.001 |
|                                                                                                         |       |          |                                                                                |                           | smokes regularly on most days for >1 year | 895 Low (no formal education)    | <b>57.70%</b> |        |
| India                                                                                                   |       |          |                                                                                | <b>Education (women)</b>  | <b>Smoker</b>                             | 1,074 High (primary or higher)   | <b>1.20%</b>  | <0.001 |
|                                                                                                         |       |          |                                                                                |                           |                                           | 1,255 Low (no formal education)  | <b>8.50%</b>  |        |
|                                                                                                         |       |          |                                                                                | <b>Occupation (men)</b>   | <b>Smoker</b>                             | 434 Skilled*                     | <b>34.10%</b> | <0.001 |
|                                                                                                         |       |          |                                                                                |                           |                                           | 1,501 Unskilled                  | <b>51.30%</b> |        |
|                                                                                                         |       |          |                                                                                | <b>Occupation (women)</b> | <b>Smoker</b>                             | 88 Skilled*                      | <b>1.10%</b>  | 0.06   |
|                                                                                                         |       |          |                                                                                |                           |                                           | 872 Unskilled                    | <b>7.10%</b>  |        |
| <i>*skilled manual labour, owner of business/farmer office worker/non-professional or professional)</i> |       |          |                                                                                |                           |                                           |                                  |               |        |
|                                                                                                         |       |          |                                                                                | <b>Income (men)</b>       | <b>Smoker</b>                             | 912 High (>2000 INR/month)       | <b>13.20%</b> | <0.001 |
|                                                                                                         |       |          |                                                                                |                           |                                           | 717 Middle (1200-1999 INR/month) | <b>12.60%</b> |        |
|                                                                                                         |       |          |                                                                                |                           |                                           | 577 Low (0-1199 INR/month)       | <b>14.50%</b> |        |
|                                                                                                         |       |          |                                                                                | <b>Income (women)</b>     | <b>Smoker</b>                             | 945 High (>2000 INR/month)       | <b>4.20%</b>  | <0.001 |
|                                                                                                         |       |          |                                                                                |                           |                                           | 550 Middle (1200-1999 INR/month) | <b>3.80%</b>  |        |
|                                                                                                         |       |          |                                                                                |                           |                                           | 834 Low (0-1199 INR/month)       | <b>7.10%</b>  |        |
| No adjustment described                                                                                 |       |          |                                                                                |                           |                                           |                                  |               |        |

**Gupta et al. (2012)** - Funded by the South Asian Society of Atherosclerosis and Thrombosis

|                 |       |      |                                                |                  |                                |                            |               |  |
|-----------------|-------|------|------------------------------------------------|------------------|--------------------------------|----------------------------|---------------|--|
| cross-sectional | 6,198 | high | General population in middle-class areas of 11 | <b>Education</b> | <b>Tobacco use</b>             | 1,248 Low (0-10 years)     | <b>24.30%</b> |  |
|                 |       |      |                                                |                  | daily use of a tobacco product | 2,956 Middle (11-15 years) | <b>14.40%</b> |  |

## Tobacco

|       |                                                                                                  |                                                                                    |                    |                                    |               |  |                          |
|-------|--------------------------------------------------------------------------------------------------|------------------------------------------------------------------------------------|--------------------|------------------------------------|---------------|--|--------------------------|
|       |                                                                                                  |                                                                                    |                    | 1,366 High (>15 years)             | <b>19.00%</b> |  |                          |
|       |                                                                                                  |                                                                                    |                    |                                    |               |  |                          |
|       |                                                                                                  |                                                                                    |                    |                                    |               |  |                          |
| India | cities, excluded house-bound, pregnant and those likely to die within 6 months. Aged 18-75 years | <b>Occupational Class</b><br><b>(British Social Register, housewife = husband)</b> | <b>Tobacco use</b> | 1,287 Low (4-5)                    | <b>16.10%</b> |  |                          |
|       |                                                                                                  |                                                                                    |                    | 1,677 Middle (3 manual/non-manual) | <b>20.30%</b> |  |                          |
|       |                                                                                                  |                                                                                    |                    | 3,018 High (1-2 )                  | <b>16.70%</b> |  |                          |
|       |                                                                                                  |                                                                                    |                    |                                    |               |  |                          |
|       |                                                                                                  | <b>SES (self-assessed)</b>                                                         | <b>Tobacco use</b> | 374 Low (score 1-3)                | <b>17.60%</b> |  |                          |
|       |                                                                                                  |                                                                                    |                    | 3,622 Middle (score 4-6)           | <b>19.60%</b> |  |                          |
|       |                                                                                                  |                                                                                    |                    | 1,114 High ( score 7-10)           | <b>15.50%</b> |  |                          |
|       |                                                                                                  |                                                                                    |                    |                                    |               |  | adjusted for age and sex |

**Reddy et al. (2007)** - Funded by the Indian Ministry of Health; WHO

|                        |      |                                                                                             |                          |                                                |            |    |                                 |
|------------------------|------|---------------------------------------------------------------------------------------------|--------------------------|------------------------------------------------|------------|----|---------------------------------|
| cross-sectional-19,96! | high | Industrial workers and their relatives from ten urban sites across India. Aged 20-69 years. |                          |                                                |            |    |                                 |
|                        |      |                                                                                             |                          |                                                |            |    |                                 |
| India                  |      |                                                                                             | <b>Education (men)</b>   | <b>Tobacco use</b>                             |            |    |                                 |
|                        |      |                                                                                             |                          | use of any tobacco product in previous 30 days |            |    |                                 |
|                        |      |                                                                                             |                          | 1,611 High (postgraduate)                      | <b>1</b>   | OR | <0.001                          |
|                        |      |                                                                                             |                          | 2,607 Middle-high (secondary-tertiary)         | <b>1.3</b> |    | 1.1-1.5                         |
|                        |      |                                                                                             |                          | 5,820 Middle-low (primary-secondary)           | <b>1.9</b> |    | 1.6-2.2                         |
|                        |      |                                                                                             |                          | 1,859 Low (none-primary)                       | <b>6.5</b> |    | 5.2-8.1                         |
|                        |      |                                                                                             | <b>Education (women)</b> | <b>Tobacco use</b>                             |            |    |                                 |
|                        |      |                                                                                             |                          | 960 High (postgraduate)                        | <b>1</b>   | OR | <0.001                          |
|                        |      |                                                                                             |                          | 1,635 Middle-high (secondary-tertiary)         | <b>1.1</b> |    | 0.8-1.3                         |
|                        |      |                                                                                             |                          | 2,832 Middle-low (primary-secondary)           | <b>1.1</b> |    | 0.76-1.4                        |
|                        |      |                                                                                             |                          | 2,645 Low (none-primary)                       | <b>8.2</b> |    | 6.4-9.9                         |
|                        |      |                                                                                             |                          |                                                |            |    | adjusted for age and occupation |

**Singh et al. (2007)** - Funded by the Center of Nutrition Research, International College of Nutrition (India)

|                       |      |                                                                                                          |                                                                 |                            |               |  |        |
|-----------------------|------|----------------------------------------------------------------------------------------------------------|-----------------------------------------------------------------|----------------------------|---------------|--|--------|
| cross-sectional 2,222 | high | Spouses/relatives surveyed about their deceased from 1999-2001, who lived in Moradabad. Aged 25-64 years |                                                                 |                            |               |  |        |
|                       |      |                                                                                                          |                                                                 |                            |               |  |        |
| India                 |      |                                                                                                          | <b>SES (men) education, occupation, income, assets, housing</b> | <b>Tobacco consumption</b> |               |  |        |
|                       |      |                                                                                                          |                                                                 | use of tobacco product     |               |  |        |
|                       |      |                                                                                                          |                                                                 | 264 Highest                | <b>58.00%</b> |  | >0.05* |
|                       |      |                                                                                                          |                                                                 | 345 High                   | <b>51.00%</b> |  |        |
|                       |      |                                                                                                          |                                                                 | 290 Middle                 | <b>47.60%</b> |  |        |
|                       |      |                                                                                                          |                                                                 | 277 Low                    | <b>42.60%</b> |  |        |
|                       |      |                                                                                                          |                                                                 | 209 Lowest                 | <b>51.20%</b> |  |        |



|                                             | SES (men) education, occupation, income, assets, housing | Tobacco consumption use of tobacco product |                         |               |  |        |
|---------------------------------------------|----------------------------------------------------------|--------------------------------------------|-------------------------|---------------|--|--------|
|                                             |                                                          |                                            | 163 Highest             | <b>13.50%</b> |  | <0.05* |
|                                             |                                                          |                                            | 221 High                | <b>15.40%</b> |  |        |
|                                             |                                                          |                                            | 169 Middle              | <b>11.20%</b> |  |        |
|                                             |                                                          |                                            | 159 Low                 | <b>19.50%</b> |  |        |
|                                             |                                                          |                                            | 125 Lowest              | <b>21.60%</b> |  |        |
| *comparing highest-middle vs low and lowest |                                                          |                                            | No adjustment described |               |  |        |

**Kar et al. (2010)** - Source of funding not reported

| Study Design                                        | SES      | Population                                                 | Exposure | Outcome                                              | OR  | 95% CI  | P-value |
|-----------------------------------------------------|----------|------------------------------------------------------------|----------|------------------------------------------------------|-----|---------|---------|
| cross-sectional 400                                 | moderate | Residents at eight sites in Northern India. Aged >30 years | Literacy | Current tobacco user                                 | 0.3 | 0.1-0.8 | 0.01    |
| India                                               |          |                                                            |          | any tobacco use at least once per day for past month | 1   | OR      |         |
| adjusted for age, sex, literacy, place of residence |          |                                                            |          |                                                      |     |         |         |

**Lal and Nair (2012)** - Source of funding not reported

| Study Design        | SES      | Population                                                                                 | Exposure                        | Outcome                    | OR    | 95% CI      | P-value |
|---------------------|----------|--------------------------------------------------------------------------------------------|---------------------------------|----------------------------|-------|-------------|---------|
| cross-sectional 233 | moderate | Data from India's 2009/10 Global Adult Tobacco Survey. Young Keralan men. Aged 15-24 years | SES (housing, assets, services) | Tobacco use                | 1     | OR          | <0.01   |
| India               |          |                                                                                            | Education                       | Tobacco use                | 1.00  | OR          | <0.01   |
|                     |          |                                                                                            |                                 | Low (less than secondary)  | 1.23  | 1.23-1.24   |         |
|                     |          |                                                                                            |                                 | High (secondary and above) | 0.51  | 0.51-0.52   |         |
|                     |          |                                                                                            | Occupation                      | Tobacco use                | 1.00  | OR          | <0.01   |
|                     |          |                                                                                            |                                 | Low (unemployed)           | 18.87 | 18.67-19.06 |         |
|                     |          |                                                                                            |                                 | Middle (student)           | 6.89  | 6.82-6.96   |         |
|                     |          |                                                                                            |                                 | High (working)             |       |             |         |

adjusted for age, place of residence, education, occupation, # members in household, belief that tobacco is harmful

**Samuel et al. (2012)** - Funded by the British Heart Foundation

| Study Design          | SES  | Population                                                                                                   | Exposure             | Outcome              | OR  | 95% CI  | P-value |
|-----------------------|------|--------------------------------------------------------------------------------------------------------------|----------------------|----------------------|-----|---------|---------|
| cross-sectional 2,218 | high | Young adults from population-based birth cohort in rural and urban areas of southern India. Aged 26-32 years | Wealth (asset score) | Tobacco use          | 1   | OR      |         |
| India                 |      |                                                                                                              |                      | Lowest (quintile 1)  | 0.6 | 0.4-0.9 |         |
|                       |      |                                                                                                              |                      | Low (quinile 2)      | 0.5 | 0.3-0.7 |         |
|                       |      |                                                                                                              |                      | Middle (quintile 3)  | 0.5 | 0.4-0.9 |         |
|                       |      |                                                                                                              |                      | High (quinile 4)     | 0.4 | 0.2-0.6 |         |
|                       |      |                                                                                                              |                      | Highest (Quintile 5) |     |         |         |

## Tobacco

|                                                                                                                   |          | Education                                                                                                                                     | Tobacco use            | Low (0 years formal schooling)                     | 1                               | OR      |                 |
|-------------------------------------------------------------------------------------------------------------------|----------|-----------------------------------------------------------------------------------------------------------------------------------------------|------------------------|----------------------------------------------------|---------------------------------|---------|-----------------|
|                                                                                                                   |          |                                                                                                                                               |                        | Middle-low (1-8 years)                             | 0.8                             | 0.5-1.4 |                 |
|                                                                                                                   |          |                                                                                                                                               |                        | Middle-high (9-12)                                 | 0.5                             | 0.3-0.9 |                 |
|                                                                                                                   |          |                                                                                                                                               |                        | High (>12 years)                                   | 0.2                             | 0.1-0.4 |                 |
| adjusted for gender, place of residence, possessions score, adult educational status, paternal educational status |          |                                                                                                                                               |                        |                                                    |                                 |         |                 |
| <b>Gupta et al. (2015)</b> - Funded by the South Asian Society of Atherosclerosis and Thrombosis                  |          |                                                                                                                                               |                        |                                                    |                                 |         |                 |
| cross-sectional 6,198                                                                                             | high     | General population in middle-class areas of 11 cities, excluded house-bound, pregnant and those likely to die within 6 months. Aged >20 years | Education              | Quit tobacco                                       | 1,248 Low (0-10 years)          | 1.60%   | 0.139           |
| India                                                                                                             |          |                                                                                                                                               |                        | quit for >1year having used for >1 year previously | 2,956 Middle (11-15 years)      | 2.80%   |                 |
|                                                                                                                   |          |                                                                                                                                               |                        |                                                    | 1,366 High (>15 years)          | 5.50%   |                 |
| adjusted for age and sex                                                                                          |          |                                                                                                                                               |                        |                                                    |                                 |         |                 |
| <b>Safraj et al. (2012)</b> - No external funding                                                                 |          |                                                                                                                                               |                        |                                                    |                                 |         |                 |
| cross-sectional 74147                                                                                             | moderate | PROFILE cohort - rural Kerala adults. Aged >20 years                                                                                          | SES (assets, services) | Smoking                                            | 9,557 Highest                   | 13.50%  |                 |
| India                                                                                                             |          |                                                                                                                                               |                        |                                                    | 23,468 Upper Middle             | 17.60%  |                 |
|                                                                                                                   |          |                                                                                                                                               |                        |                                                    | 32,577 Lowe Middle              | 24.90%  |                 |
|                                                                                                                   |          |                                                                                                                                               |                        |                                                    | 8,545 Lowest                    | 30.30%  |                 |
| No adjustment described                                                                                           |          |                                                                                                                                               |                        |                                                    |                                 |         |                 |
| <b>Jena et al. (2012)</b> - Source of funding not reported                                                        |          |                                                                                                                                               |                        |                                                    |                                 |         |                 |
| cross-sectional 69,296                                                                                            | high     | Smokers from 29 territories, from the nationally representative 2009 Indian Global Adult Tobacco Survey. Aged >15 years                       | Occupation             | Hardcore smoker*                                   | Employee                        | 1       | OR              |
| India                                                                                                             |          |                                                                                                                                               |                        |                                                    | Student                         | 2.40    | 1.16-4.95 0.018 |
|                                                                                                                   |          |                                                                                                                                               |                        |                                                    | Self-employed                   | 2.64    | 1.28-5.45 0.008 |
|                                                                                                                   |          |                                                                                                                                               |                        |                                                    | Homemaker                       | 2.49    | 1.18-5.26 0.017 |
|                                                                                                                   |          |                                                                                                                                               |                        |                                                    | Retired or unemployed           | 2.24    | 1.07-4.69 0.033 |
|                                                                                                                   |          |                                                                                                                                               | Education              | Hardcore smoker*                                   | Low (no formal education)       | 1       | OR              |
|                                                                                                                   |          |                                                                                                                                               |                        |                                                    | Medium-low (primary incomplete) | 0.96    | 0.84-1.10 0.569 |
|                                                                                                                   |          |                                                                                                                                               |                        |                                                    | Medium (primary but secondary i | 1.01    | 0.90-1.11 0.900 |

\*Proportion of daily smokers who have not attempted to quit in prev 12 months/ last attempt was <24h and no intention to quit in next 12 months if at all, smokes within 30 mins of waking and knows smoking is harmful

|                                                                                                                                                                                    |         |      |                                                                    | High (secondary and above)                        | 1.00                 | 0.85-1.19                                                 | 0.990 |           |        |
|------------------------------------------------------------------------------------------------------------------------------------------------------------------------------------|---------|------|--------------------------------------------------------------------|---------------------------------------------------|----------------------|-----------------------------------------------------------|-------|-----------|--------|
| Multivariate logistic regression, variables not reported                                                                                                                           |         |      |                                                                    |                                                   |                      |                                                           |       |           |        |
| <b>Narayan et al. (1996)</b> - Funded by the Sitaram Bhartia Institute of Science and Research                                                                                     |         |      |                                                                    |                                                   |                      |                                                           |       |           |        |
| cross-sectional                                                                                                                                                                    | 13,558  | high | Residents of Delhi. Aged 25-64 years                               | <b>Education (men)</b>                            | <b>Smoker</b>        | Low (none)                                                | 1.75  | 1.52-2.02 |        |
|                                                                                                                                                                                    |         |      |                                                                    |                                                   |                      | currently smoking or had smoked >100 cigarettes or beedis |       |           |        |
|                                                                                                                                                                                    |         |      |                                                                    |                                                   |                      | Middle-low (primary)                                      | 1.29  | 1.12-1.48 |        |
|                                                                                                                                                                                    |         |      |                                                                    |                                                   |                      | Middle-low (primary)                                      | 1.06  | 0.94-1.19 |        |
|                                                                                                                                                                                    |         |      |                                                                    |                                                   |                      | Middle-high (secondary)                                   | 0.84  | 0.75-0.94 |        |
|                                                                                                                                                                                    |         |      |                                                                    |                                                   |                      | High (college)                                            | 1     | OR        |        |
|                                                                                                                                                                                    |         |      |                                                                    | <b>Education (women)</b>                          | <b>Smoker</b>        | Low (none)                                                | 3.72  | 2.66-4.82 |        |
|                                                                                                                                                                                    |         |      |                                                                    |                                                   |                      | Middle-low (primary)                                      | 1.13  | 0.79-1.63 |        |
|                                                                                                                                                                                    |         |      |                                                                    |                                                   |                      | Middle-low (primary)                                      | 0.94  | 0.59-1.50 |        |
|                                                                                                                                                                                    |         |      |                                                                    |                                                   |                      | Middle-high (secondary)                                   | 0.44  | 0.24-0.79 |        |
|                                                                                                                                                                                    |         |      |                                                                    |                                                   |                      | High (college)                                            | 1     | OR        |        |
|                                                                                                                                                                                    |         |      |                                                                    | <b>Occupation (men)</b>                           | <b>Smoker</b>        | High (I)                                                  | 1     | OR        |        |
|                                                                                                                                                                                    |         |      |                                                                    |                                                   |                      | Medium-high (II)                                          | 1.15  | 0.96-1.38 |        |
|                                                                                                                                                                                    |         |      |                                                                    |                                                   |                      | Medium-low (III)                                          | 0.8   | 0.63-1.02 |        |
|                                                                                                                                                                                    |         |      |                                                                    |                                                   |                      | Low (IV)                                                  | 1.39  | 1.13-1.70 |        |
|                                                                                                                                                                                    |         |      |                                                                    | <b>Occupation (women)</b>                         | <b>Smoker</b>        | High (I)                                                  | 1     | OR        |        |
|                                                                                                                                                                                    |         |      |                                                                    |                                                   |                      | Medium-high (II)                                          | 1.47  | 0.47-4.62 |        |
|                                                                                                                                                                                    |         |      |                                                                    |                                                   |                      | Medium-low (III)                                          | 0.87  | 0.32-2.41 |        |
|                                                                                                                                                                                    |         |      |                                                                    |                                                   |                      | Low (IV)                                                  | 1.91  | 0.64-5.70 |        |
| adjusted for income, edu, marital status, religion, occupation, physical activity, leisure activity, BMI, drinking status, meat intake, egg eating, vegetarian, family history CVD |         |      |                                                                    |                                                   |                      |                                                           |       |           |        |
| <b>Rani et al. (2003)</b> - Source of funding not reported                                                                                                                         |         |      |                                                                    |                                                   |                      |                                                           |       |           |        |
| cross-sectional                                                                                                                                                                    | 334,553 | high | Data from the 1998/9 National Family Health Survey. Aged >15 years | <b>Household wealth (men) dwelling and assets</b> | <b>Smoke tobacco</b> | Highest quintile                                          | 1     | OR        | ref    |
|                                                                                                                                                                                    |         |      |                                                                    |                                                   |                      | Second quintile                                           | 1.53  |           | <0.001 |
|                                                                                                                                                                                    |         |      |                                                                    |                                                   |                      | Middle quintile                                           | 1.94  |           | <0.001 |
|                                                                                                                                                                                    |         |      |                                                                    |                                                   |                      | Fourth quintile                                           | 2.11  |           | <0.001 |
|                                                                                                                                                                                    |         |      |                                                                    |                                                   |                      | Lowest quintile                                           | 2.26  |           | <0.001 |
|                                                                                                                                                                                    |         |      |                                                                    | <b>Household wealth (men) dwelling and assets</b> | <b>Chew tobacco</b>  | Highest quintile                                          | 1     | OR        | ref    |
|                                                                                                                                                                                    |         |      |                                                                    |                                                   |                      | Second quintile                                           | 1.4   |           | <0.001 |
|                                                                                                                                                                                    |         |      |                                                                    |                                                   |                      | Middle quintile                                           | 1.55  |           | <0.001 |
|                                                                                                                                                                                    |         |      |                                                                    |                                                   |                      | Fourth quintile                                           | 1.69  |           | <0.001 |
|                                                                                                                                                                                    |         |      |                                                                    |                                                   |                      | Lowest quintile                                           | 1.93  |           | <0.001 |
|                                                                                                                                                                                    |         |      |                                                                    | <b>Household wealth (women)</b>                   | <b>Smoke tobacco</b> | Highest quintile                                          | 1     | OR        |        |

## Tobacco

|  |                                                     |                               |             |    |        |
|--|-----------------------------------------------------|-------------------------------|-------------|----|--------|
|  | <b>dwelling and assets</b>                          | Second quintile               | <b>1.57</b> |    | <0.001 |
|  |                                                     | Middle quintile               | <b>2.68</b> |    | <0.001 |
|  |                                                     | Fourth quintile               | <b>3.26</b> |    | <0.001 |
|  |                                                     | Lowest quintile               | <b>4.32</b> |    | <0.001 |
|  | <b>Household wealth (women) dwelling and assets</b> | Chew tobacco                  |             |    |        |
|  |                                                     | Highest quintile              | <b>1</b>    | OR |        |
|  |                                                     | Second quintile               | <b>1.52</b> |    | <0.001 |
|  |                                                     | Middle quintile               | <b>1.92</b> |    | <0.001 |
|  |                                                     | Fourth quintile               | <b>2.15</b> |    | <0.001 |
|  |                                                     | Lowest quintile               | <b>2.58</b> |    | <0.001 |
|  | <b>Education (men)</b>                              | Smoke tobacco                 |             |    |        |
|  |                                                     | High (>11 years)              | <b>1</b>    | OR |        |
|  |                                                     | Medium-high (6-10 years)      | <b>1.84</b> |    | <0.001 |
|  |                                                     | Medium-low (1-5 years)        | <b>2.72</b> |    | <0.001 |
|  |                                                     | Low (No formal education)     | <b>3.17</b> |    | <0.001 |
|  | <b>Education (men)</b>                              | Chew tobacco                  |             |    |        |
|  |                                                     | High (>11 years)              | <b>1</b>    | OR |        |
|  |                                                     | Medium-high (6-10 years)      | <b>1.48</b> |    | <0.001 |
|  |                                                     | Medium-low (1-5 years)        | <b>1.86</b> |    | <0.001 |
|  |                                                     | Low (No formal education)     | <b>1.92</b> |    | <0.001 |
|  | <b>Education (women)</b>                            | Smoke tobacco                 |             |    |        |
|  |                                                     | High (>11 years)              | <b>1</b>    | OR |        |
|  |                                                     | Medium-high (6-10 years)      | <b>1.73</b> |    | >0.05  |
|  |                                                     | Medium-low (1-5 years)        | <b>2.82</b> |    | <0.05  |
|  |                                                     | Low (No formal education)     | <b>6.25</b> |    | <0.001 |
|  | <b>Education (women)</b>                            | Chew tobacco                  |             |    |        |
|  |                                                     | High (>11 years)              | <b>1</b>    | OR |        |
|  |                                                     | Medium-high (6-10 years)      | <b>2.05</b> |    | <0.001 |
|  |                                                     | Medium-low (1-5 years)        | <b>3.81</b> |    | <0.001 |
|  |                                                     | Low (No formal education)     | <b>4.97</b> |    | <0.001 |
|  | <b>Caste (men)</b>                                  | Smoke tobacco                 |             |    |        |
|  |                                                     | High (Forward/general caste)  | <b>1</b>    | OR |        |
|  |                                                     | Medium (Other backward caste) | <b>1.01</b> |    | >0.05  |
|  |                                                     | Low (Scheduled caste)         | <b>1.2</b>  |    | <0.001 |
|  |                                                     | Low (Scheduled tribe)         | <b>1.05</b> |    | >0.05  |
|  | <b>Caste (men)</b>                                  | Chew tobacco                  |             |    |        |
|  |                                                     | High (Forward/general caste)  | <b>1</b>    | OR |        |
|  |                                                     | Medium (Other backward caste) | <b>1.07</b> |    | <0.05  |
|  |                                                     | Low (Scheduled caste)         | <b>1.12</b> |    | <0.05  |
|  |                                                     | Low (Scheduled tribe)         | <b>1.23</b> |    | <0.001 |
|  | <b>Caste (women)</b>                                | Smoke tobacco                 |             |    |        |
|  |                                                     | High (Forward/general caste)  | <b>1</b>    | OR |        |

|  |  |                      |                     |                               |             |        |
|--|--|----------------------|---------------------|-------------------------------|-------------|--------|
|  |  |                      |                     | Medium (Other backward caste) | <b>1.09</b> | <0.001 |
|  |  |                      |                     | Low (Scheduled caste)         | <b>1.34</b> | >0.05  |
|  |  |                      |                     | Low (Scheduled tribe)         | <b>1.49</b> | <0.05  |
|  |  | <b>Caste (women)</b> | <b>Chew tobacco</b> | High (Forward/general caste)  | <b>1</b>    | OR     |
|  |  |                      |                     | Medium (Other backward caste) | <b>1.14</b> | >0.05  |
|  |  |                      |                     | Low (Scheduled caste)         | <b>1.62</b> | <0.001 |
|  |  |                      |                     | Low (Scheduled tribe)         | <b>2.49</b> | <0.001 |

adjusted for wealth, years of schooling, religion, caste, age, sex, urban/rural

**Heck et al. (2012)** - Funded by US National Institutes of Health

|                        |      |                                                                                          |                  |                                                         |                    |             |           |
|------------------------|------|------------------------------------------------------------------------------------------|------------------|---------------------------------------------------------|--------------------|-------------|-----------|
| cross-sectional 19,934 | high | Married Bangladeshi adults from a longitudinal arsenic study (HEALS).<br>Age 18-75 years | <b>Education</b> | <b>Betel quid</b>                                       | Low (no formal)    | <b>2</b>    | 1.81-2.20 |
| Bangladesh             |      |                                                                                          |                  | use with or without tobacco (82.5% use it with tobacco) | Middle (1-5 years) | <b>1.65</b> | 1.49-1.82 |
|                        |      |                                                                                          |                  |                                                         | High (>6 years)    | <b>1</b>    | OR        |

adjusted for gender, age, marital status, occupation, religion, land ownership, TV ownership, smoking pack years

**Mumu et al. (2014)** - Source of funding not reported

|                     |          |                                                                                                           |                  |                                              |                                  |              |      |
|---------------------|----------|-----------------------------------------------------------------------------------------------------------|------------------|----------------------------------------------|----------------------------------|--------------|------|
| cross-sectional 374 | moderate | Type 2 diabetics who had been diagnosed for >1 year from 9 health centres around Dhaka.<br>Aged >20 years | <b>Education</b> | <b>Smoker (continues)</b>                    | 112 Low (up to primary)          | <b>6.30%</b> | 0.54 |
| Bangladesh          |          |                                                                                                           |                  | still smoking despite medical advice to quit | 174 Medium (up to higher second) | <b>4.60%</b> |      |
|                     |          |                                                                                                           |                  |                                              | 88 High (graduate and above)     | <b>8.00%</b> |      |
|                     |          |                                                                                                           |                  |                                              | No adjustment described          |              |      |

**Goon and Bipasha (2014)** - No external funding

|                     |          |                                     |                 |               |                         |            |          |
|---------------------|----------|-------------------------------------|-----------------|---------------|-------------------------|------------|----------|
| cross-sectional 400 | moderate | Bus drivers in Dhaka.<br>Aged 18-50 | <b>Literacy</b> | <b>Smoker</b> | 165 Literate            | <b>1</b>   | OR       |
| Bangladesh          |          |                                     |                 |               | 235 Illiterate          | <b>2.8</b> | 1.2-6.13 |
|                     |          |                                     |                 |               | No adjustment described |            |          |

**Zaman et al. (2014)** - No external funding

|                 |     |                         |                     |                  |                                       |               |        |
|-----------------|-----|-------------------------|---------------------|------------------|---------------------------------------|---------------|--------|
| cross-sectional | low | Men from the nationally | <b>Tobacco use*</b> | <b>Education</b> | 1,292 Non-smokers (no tobacco at all) | <b>35.40%</b> | <0.001 |
|-----------------|-----|-------------------------|---------------------|------------------|---------------------------------------|---------------|--------|

## Tobacco

|                                                                                       |                                                                                              |                                                                        |                                       |               |        |
|---------------------------------------------------------------------------------------|----------------------------------------------------------------------------------------------|------------------------------------------------------------------------|---------------------------------------|---------------|--------|
| 4,312                                                                                 | representative 2012 WHO                                                                      | % with less than primary education                                     | 1,752 Smokers                         | <b>58.30%</b> |        |
| Bangladesh                                                                            | NCD risk factor survey. Recruited from urban and rural areas in 62 districts. Aged >25 years |                                                                        | 655 Smokeless tobacco users           | <b>59.20%</b> |        |
|                                                                                       |                                                                                              |                                                                        | 313 Dual users                        | <b>65.10%</b> |        |
|                                                                                       | <b>Tobacco use*</b>                                                                          | <b>Wealth</b>                                                          | 1,292 Non-smokers (no tobacco at all) | <b>14.00%</b> | <0.001 |
|                                                                                       |                                                                                              | poorest quartile from principal component analysis of household assets | 1,752 Smokers                         | <b>23.90%</b> |        |
|                                                                                       |                                                                                              |                                                                        | 655 Smokeless tobacco users           | <b>22.60%</b> |        |
|                                                                                       |                                                                                              |                                                                        | 313 Dual users                        | <b>27.70%</b> |        |
| *smoked a tobacco product in the last 30 days - doesn't use any other form of tobacco |                                                                                              |                                                                        | No adjustment described               |               |        |

**Kishore et al. (2013)** - Source of funding not reported

|                             |      |                                                                                                                                                              |                                  |                                                 |            |                             |             |                                 |      |
|-----------------------------|------|--------------------------------------------------------------------------------------------------------------------------------------------------------------|----------------------------------|-------------------------------------------------|------------|-----------------------------|-------------|---------------------------------|------|
| cross-sectional             | high | Data from Global Adult Tobacco Survey data from India 2009/10 (69,296 individuals), Thailand 2009 (20,566 individuals), Bangladesh 2009 (9,629 individuals). | <b>Education (India)</b>         | <b>Hardcore smoker*</b>                         | 24,309,857 | High (college and above)    | <b>1</b>    | OR - Binary logistic regression |      |
| 92,491                      |      |                                                                                                                                                              |                                  | odds of daily smoker becoming a hardcore smoker |            | Medium-high (higher second) | <b>0.98</b> | 0.66-1.44                       | 0.91 |
| India, Thailand, Bangladesh |      | Aged >15 years                                                                                                                                               |                                  |                                                 |            | Medium-low (up to primary)  | <b>0.96</b> | 0.62-1.48                       | 0.85 |
|                             |      |                                                                                                                                                              |                                  |                                                 |            | Low (no formal education)   | <b>1.1</b>  | 0.72-1.68                       | 0.65 |
|                             |      |                                                                                                                                                              | <b>Wealth Index (India)</b>      | <b>Hardcore smoker</b>                          | 24,309,857 | Highest                     | <b>1</b>    | OR - Binary logistic regression |      |
|                             |      |                                                                                                                                                              | principal component analysis     |                                                 |            | Lowest                      | <b>1.27</b> | 0.9-1.79                        | 0.17 |
|                             |      |                                                                                                                                                              |                                  |                                                 |            | Second                      | <b>1.29</b> | 0.92-1.81                       | 0.14 |
|                             |      |                                                                                                                                                              |                                  |                                                 |            | Middle                      | <b>1.17</b> | 0.85-1.60                       | 0.33 |
|                             |      |                                                                                                                                                              |                                  |                                                 |            | Fourth                      | <b>1.08</b> | 0.80-1.47                       | 0.6  |
|                             |      |                                                                                                                                                              | <b>Education (Bangladesh)</b>    | <b>Hardcore smoker</b>                          | 3,651,921  | High (college and above)    | <b>1</b>    | OR - Binary logistic regression |      |
|                             |      |                                                                                                                                                              |                                  |                                                 |            | Medium-high (higher second) | <b>2.39</b> | 0.83-6.95                       | 0.11 |
|                             |      |                                                                                                                                                              |                                  |                                                 |            | Medium-low (up to primary)  | <b>1.9</b>  | 0.65-5.60                       | 0.24 |
|                             |      |                                                                                                                                                              |                                  |                                                 |            | Low (no formal education)   | <b>2.26</b> | 0.78-6.55                       | 0.13 |
|                             |      |                                                                                                                                                              | <b>Wealth Index (Bangladesh)</b> | <b>Hardcore smoker</b>                          | 3,651,921  | Highest                     | <b>1</b>    | OR - Binary logistic regression |      |
|                             |      |                                                                                                                                                              | principal component analysis     |                                                 |            | Lowest                      | <b>3.15</b> | 1.67-5.97                       | 0    |
|                             |      |                                                                                                                                                              |                                  |                                                 |            | Second                      | <b>2.68</b> | 1.12-5.05                       | 0    |
|                             |      |                                                                                                                                                              |                                  |                                                 |            | Middle                      | <b>1.93</b> | 1.07-3.50                       | 0.03 |

|  |                                |                        |           |                             |             |                                 |      |
|--|--------------------------------|------------------------|-----------|-----------------------------|-------------|---------------------------------|------|
|  |                                |                        |           | Fourth                      | <b>1.49</b> | 0.83-2.67                       | 0.18 |
|  | <b>Education (Thailand)</b>    | <b>Hardcore smoker</b> | 3,180,566 | High (college and above)    | <b>1</b>    | OR - Binary logistic regression |      |
|  |                                |                        |           | Medium-high (higher second) | <b>0.9</b>  | 0.59-1.37                       | 0.63 |
|  |                                |                        |           | Medium-low (up to primary)  | <b>1.07</b> | 0.70-1.63                       | 0.76 |
|  |                                |                        |           | Low (no formal education)   | <b>0.96</b> | 0.51-1.79                       | 0.89 |
|  | <b>Wealth Index (Thailand)</b> | <b>Hardcore smoker</b> | 3,180,566 | Highest                     | <b>1</b>    | OR - Binary logistic regression |      |
|  | principal component analysis   |                        |           | Lowest                      | <b>1.28</b> | 0.92-1.77                       | 0.14 |
|  |                                |                        |           | Second                      | <b>1.04</b> | 0.75-1.43                       | 0.83 |
|  |                                |                        |           | Middle                      | <b>1</b>    | 0.75-1.33                       | 0.98 |
|  |                                |                        |           | Fourth                      | <b>1.08</b> | 0.8-1.45                        | 0.63 |

\*current daily smoking, no quit attempt in last 12 months or last quit was <24h, no intention to quit in next 12 months or not interested  
first smoke within 30mins of waking, knowledge of harms

No adjustment described

**Dhungana et al. (2014)** - Source of funding not reported

|                     |      |                                           |  |                                 |               |                                 |               |        |
|---------------------|------|-------------------------------------------|--|---------------------------------|---------------|---------------------------------|---------------|--------|
| cross-sectional 406 | high | Rural community in the Sindhuli district. |  | <b>Caste</b>                    | <b>Smoker</b> | High (Brahman/Chhetri)          | <b>26.20%</b> | 0.79   |
|                     |      | Aged 20-50 years                          |  |                                 |               | Middle (Adhibasi/Janajati)      | <b>29.70%</b> |        |
| Nepal               |      |                                           |  |                                 |               | Low (Dalits)                    | <b>28.60%</b> |        |
|                     |      |                                           |  | <b>Education</b>                | <b>Smoker</b> | Low (no formal education)       | <b>44.70%</b> | <0.001 |
|                     |      |                                           |  |                                 |               | Middle-low (lower than primary) | <b>17.20%</b> |        |
|                     |      |                                           |  |                                 |               | Middle-high (primary)           | <b>8.30%</b>  |        |
|                     |      |                                           |  |                                 |               | High (secondary and higher)     | <b>18.20%</b> |        |
|                     |      |                                           |  | <b>SES</b>                      | <b>Smoker</b> | Lowest                          | <b>42.60%</b> | <0.001 |
|                     |      |                                           |  | (education, occupation, income) |               | Middle-low                      | <b>27.70%</b> |        |
|                     |      |                                           |  |                                 |               | Middle-high                     | <b>18.80%</b> |        |
|                     |      |                                           |  |                                 |               | Highest                         | <b>0.00%</b>  |        |

No adjustment described

**Chawla et al. (2010)** - No external funding

|                     |     |                                                                                          |  |                  |               |                           |               |      |
|---------------------|-----|------------------------------------------------------------------------------------------|--|------------------|---------------|---------------------------|---------------|------|
| cross-sectional 240 | low | Residents Pokhara valley, self administered questionnaire. Mean age 33.4y, SD 11.4 years |  | <b>Education</b> | <b>Smoker</b> | Low (illiterate)          | <b>40%</b>    | 0.23 |
|                     |     |                                                                                          |  |                  |               | Medium (higher secondary) | <b>34.80%</b> |      |
| Nepal               |     |                                                                                          |  |                  |               | High (Graduate)           | <b>25%</b>    |      |

No adjustment described

**Dewi et al. (2010)** - Funded by Provincial Health Office of Yogyakarta Special Regency, Indonesia

## Tobacco

|                 |          |                          |                                    |                                |                      |            |  |
|-----------------|----------|--------------------------|------------------------------------|--------------------------------|----------------------|------------|--|
| cross-sectional | moderate | Representative sample of | <b>Income (male) 15-35 years</b>   | <b>Cigarettes</b>              | Low (<mean income)   | <b>62%</b> |  |
| 3,285           |          | residents of Yogyakarta. |                                    | at least one cigarette per day | High (> mean income) | <b>52%</b> |  |
| Indonesia       |          | Aged 15-75 years         | <b>35-54 years</b>                 |                                | Low (<mean income)   | <b>72%</b> |  |
|                 |          |                          | <b>55-75 years</b>                 |                                | High (> mean income) | <b>67%</b> |  |
|                 |          |                          |                                    |                                | Low (<mean income)   | <b>65%</b> |  |
|                 |          |                          |                                    |                                | High (> mean income) | <b>50%</b> |  |
|                 |          |                          | <b>Income (female) 15-35 years</b> | <b>Cigarettes</b>              | Low (<mean income)   | <b>2%</b>  |  |
|                 |          |                          |                                    |                                | High (> mean income) | <b>4%</b>  |  |
|                 |          |                          | <b>35-54 years</b>                 |                                | Low (<mean income)   | <b>0%</b>  |  |
|                 |          |                          |                                    |                                | High (> mean income) | <b>1%</b>  |  |
|                 |          |                          | <b>55-75 years</b>                 |                                | Low (<mean income)   | <b>3%</b>  |  |
|                 |          |                          |                                    |                                | High (> mean income) | <b>2%</b>  |  |

No adjustment described

**Taylor et al. (1996)** - Funded by the International Network for Clinical Epidemiology; National Institute of Medical Research (Lagos)

|                 |     |                                                                          |                                   |                 |                       |               |       |
|-----------------|-----|--------------------------------------------------------------------------|-----------------------------------|-----------------|-----------------------|---------------|-------|
| cross-sectional | low | Survey of adults selected                                                | <b>Income (men) 20-39 years</b>   | <b>Smoker</b>   | Low (<NGN 3000/year)  | <b>33.00%</b> | >0.05 |
| 882             |     | from the civil service, three research institutions and two communities. |                                   | 'smoking habit' | High (>NGN 3000/year) | <b>39.70%</b> |       |
| Nigeria         |     | Aged >20 years                                                           | <b>Income (men) 40-59 years</b>   | <b>Smoker</b>   | Low (<NGN 3000/year)  | <b>40.00%</b> | >0.05 |
|                 |     |                                                                          |                                   |                 | High (>NGN 3000/year) | <b>37.40%</b> |       |
|                 |     |                                                                          | <b>Income (women) 20-39 years</b> | <b>Smoker</b>   | Low (<NGN 3000/year)  | <b>3.60%</b>  | >0.05 |
|                 |     |                                                                          |                                   |                 | High (>NGN 3000/year) | <b>4.70%</b>  |       |
|                 |     |                                                                          | <b>Income (women) 40-59 years</b> | <b>Smoker</b>   | Low (<NGN 3000/year)  | <b>3.10%</b>  | >0.05 |
|                 |     |                                                                          |                                   |                 | High (>NGN 3000/year) | <b>5.30%</b>  |       |

No adjustment described

**Bovet et al. (2002)** - Funded by the Swiss National Science Foundation

|                 |       |      |                                           |                             |                  |                         |             |        |
|-----------------|-------|------|-------------------------------------------|-----------------------------|------------------|-------------------------|-------------|--------|
| cross-sectional | 9,254 | high | Rural community in the Sindhuli district. | <b>Education</b>            | <b>Smoker</b>    | Low (none)              | <b>1</b>    | OR     |
| Tanzania        |       |      | Aged 20-50 years                          |                             | ≥1 cigarette/day | Middle-low (primary)    | <b>0.93</b> | 0.622  |
|                 |       |      |                                           |                             |                  | Middle-high (secondary) | <b>0.53</b> | <0.001 |
|                 |       |      |                                           |                             |                  | High (tertiary)         | <b>0.56</b> | <0.002 |
|                 |       |      |                                           | <b>Wealth (asset score)</b> | <b>Smoker</b>    | Lowest                  | <b>1</b>    | OR     |



|         |             |        |
|---------|-------------|--------|
| Second  | <b>0.87</b> | 0.131  |
| Third   | <b>0.46</b> | <0.001 |
| Fourth  | <b>0.42</b> | <0.001 |
| Fifth   | <b>0.58</b> | 0.001  |
| Highest | <b>0.48</b> | <0.001 |

adjusted for age, sex, occupation, wealth

**Kebede (2002)** - Funded by the Research and Publication Office of the Gondar College of Medical Sciences

|                 |     |     |                                                                  |                  |                         |                                 |             |           |       |
|-----------------|-----|-----|------------------------------------------------------------------|------------------|-------------------------|---------------------------------|-------------|-----------|-------|
| cross-sectional | 181 | low | University instructors from four colleges in north west Ethiopia | <b>Income</b>    | <b>Ever smoker</b>      | 8 Low (ETB 472-500)             | <b>1.02</b> | 0.13-6.73 | <0.01 |
| Ethiopia        |     |     | Age not reported                                                 |                  | ever smoked a cigarette | 57 Medium (ETB 501-1,000)       | <b>1</b>    | OR        |       |
|                 |     |     |                                                                  |                  |                         | 116 High (ETB 1,001-1,000[sic]) | <b>3.29</b> | 1.54-7.09 |       |
|                 |     |     |                                                                  | <b>Education</b> | <b>Ever smoker</b>      | 17 Low (diploma)                | <b>1.3</b>  | 0.3-5.56  | <0.01 |
|                 |     |     |                                                                  |                  |                         | 37 Medium (BSc)                 | <b>1</b>    | OR        |       |
|                 |     |     |                                                                  |                  |                         | 127 High (MSc and above)        | <b>2.97</b> | 1.22-7.40 |       |
|                 |     |     |                                                                  |                  |                         | No adjustment described         |             |           |       |

**Sossa et al. (2013)** - Funded by the Canadian International Development Agency

|        |     |          |                                                                      |                        |                          |                         |               |  |  |
|--------|-----|----------|----------------------------------------------------------------------|------------------------|--------------------------|-------------------------|---------------|--|--|
| cohort | 208 | moderate | Healthy adults sampled from a large city, small town and rural area. | <b>Education</b>       | <b>Smoker</b>            | High school             | <b>14.50%</b> |  |  |
| Benin  |     |          | Aged 25-60 years                                                     |                        | current or former smoker | Primary schooling       | <b>17.20%</b> |  |  |
|        |     |          |                                                                      |                        |                          | No Schooling            | <b>6.70%</b>  |  |  |
|        |     |          |                                                                      | <b>Wealth (assets)</b> | <b>Smoker</b>            | High                    | <b>11.50%</b> |  |  |
|        |     |          |                                                                      |                        |                          | Medium                  | <b>9.70%</b>  |  |  |
|        |     |          |                                                                      |                        |                          | Low                     | <b>19.10%</b> |  |  |
|        |     |          |                                                                      |                        |                          | No adjustment described |               |  |  |

**Owusu-Dabo et al. (2009)** - Funded by Cancer Research UK; Institute of Clinical Research of the University of Nottingham

|                 |       |          |                                |                          |                                           |                               |               |  |  |
|-----------------|-------|----------|--------------------------------|--------------------------|-------------------------------------------|-------------------------------|---------------|--|--|
| cross-sectional |       | moderate | Nationally representative      | <b>Education (men)</b>   | <b>Cigarettes</b>                         | 1,004 Low (illiterate)        | <b>20.19%</b> |  |  |
|                 | 6,285 |          | sample, excludes               |                          | smokes now and has smoked >100 cigarettes | 765 Middle-low (primary)      | <b>27.19%</b> |  |  |
| Ghana           |       |          | institutionalised individuals. |                          |                                           | 4,206 Middle-high (secondary) | <b>39.64%</b> |  |  |
|                 |       |          | Aged >14 years                 |                          |                                           | 283 High (tertiary)           | <b>66.78%</b> |  |  |
|                 |       |          |                                | <b>Education (women)</b> | <b>Cigarettes</b>                         | 794 Low (illiterate)          | <b>0.30%</b>  |  |  |
|                 |       |          |                                |                          |                                           | 557 Middle-low (primary)      | <b>0.13%</b>  |  |  |

## Tobacco

|  |                    |                   |  |                               |               |
|--|--------------------|-------------------|--|-------------------------------|---------------|
|  |                    |                   |  | 2,539 Middle-high (secondary) | <b>0.17%</b>  |
|  |                    |                   |  | 94 High (tertiary)            | <b>0.00%</b>  |
|  | <b>SES (men)</b>   | <b>Cigarettes</b> |  | 1,462 Low (none)              | <b>24.83%</b> |
|  |                    |                   |  | 1,262 Middle-low (radio)      | <b>40.65%</b> |
|  |                    |                   |  | 1,513 Middle (Telephone)      | <b>39.52%</b> |
|  |                    |                   |  | 1,694 Middle-high (TV)        | <b>38.61%</b> |
|  |                    |                   |  | 327 High (car)                | <b>44.65%</b> |
|  | <b>SES (women)</b> | <b>Cigarettes</b> |  | 1,099 Low (none)              | <b>0.41%</b>  |
|  |                    |                   |  | 749 Middle-low (radio)        | <b>0.07%</b>  |
|  |                    |                   |  | 1,096 Middle (Telephone)      | <b>0.00%</b>  |
|  |                    |                   |  | 859 Middle-high (TV)          | <b>0.24%</b>  |
|  |                    |                   |  | 181 High (car)                | <b>0.24%</b>  |

No adjustment described

**Hosey et al. (2014)** - Funded by Uniformed Services University of the Health Sciences

|                 |          |                                   |                                 |                                                             |                                    |             |           |       |
|-----------------|----------|-----------------------------------|---------------------------------|-------------------------------------------------------------|------------------------------------|-------------|-----------|-------|
| cross-sectional | moderate | WHO STEPwise survey using         | <b>Household Income (men)</b>   | <b>Tobacco use</b>                                          | 65 High (>\$10,000)                | <b>0.53</b> | 0.24-1.19 | 0.429 |
|                 |          |                                   |                                 | daily use of cigarettes, pipes, cigars or smokeless tobacco | 121 Medium (\$5000-\$10,000)       | <b>0.79</b> | 0.42-1.51 |       |
| 1,638           |          | randomly selected                 |                                 |                                                             | 298 Low (<\$5000)                  | <b>1</b>    | OR        |       |
| FS Micronesia   |          | households in Pohnpei. Aged 25-64 | <b>Household Income (women)</b> | <b>Tobacco use</b>                                          | 93 High (>\$10,000)                | <b>0.45</b> | 0.22-0.96 | 0.78  |
|                 |          |                                   |                                 |                                                             | 170 Medium (\$5000-\$10,000)       | <b>0.75</b> | 0.39-1.44 |       |
|                 |          |                                   |                                 |                                                             | 486 Low (<\$5000)                  | <b>1</b>    | OR        |       |
|                 |          |                                   | <b>Education (males)</b>        | <b>Tobacco use</b>                                          | 99 High (Post-secondary >13years)  | <b>0.54</b> | 0.32-0.93 | 0.062 |
|                 |          |                                   |                                 |                                                             | 183 Medium (Secondary, 9-12 years) | <b>0.7</b>  | 0.46-1.06 |       |
|                 |          |                                   |                                 |                                                             | 315 Low (Primary <9 years)         | <b>1</b>    | OR        |       |
|                 |          |                                   | <b>Education (women)</b>        | <b>Tobacco use</b>                                          | 57 High (Post-secondary >13years)  | <b>0.17</b> | 0.04-0.76 | 0.042 |
|                 |          |                                   |                                 |                                                             | 302 Medium (Secondary, 9-12 years) | <b>0.69</b> | 0.45-1.06 |       |
|                 |          |                                   |                                 |                                                             | 568 Low (Primary <9 years)         | <b>1</b>    | OR        |       |

adjusted for age

**Minh et al. (2007)** - Funded by the International Network of Demographic Evaluation of Populations (INDEPTH); Swedish Council for Social and Work Life Research

|                 |       |      |                                                                        |                  |               |                |            |         |
|-----------------|-------|------|------------------------------------------------------------------------|------------------|---------------|----------------|------------|---------|
| cross-sectional | 1,984 | high | Representative 2005 STEPS survey in Bavi district of northern Vietnam. | <b>Education</b> | <b>Smoker</b> | Low (<7 years) | <b>0.9</b> | 0.6-1.4 |
|-----------------|-------|------|------------------------------------------------------------------------|------------------|---------------|----------------|------------|---------|

## Tobacco

|                                                                   |                  |                                                                   |               |                    |  |            |         |
|-------------------------------------------------------------------|------------------|-------------------------------------------------------------------|---------------|--------------------|--|------------|---------|
| Vietnam                                                           | Aged 25-64 years |                                                                   |               | Middle (7-9 years) |  | <b>0.8</b> | 0.6-1.2 |
|                                                                   |                  |                                                                   |               | High (>9 years)    |  | <b>1</b>   | OR      |
|                                                                   |                  | <b>SES</b><br>(local authority assessment<br>and rice production) | <b>Smoker</b> | low                |  | <b>2</b>   | 1.2-3.4 |
|                                                                   |                  |                                                                   |               | middle             |  | <b>1.4</b> | 1.1-2   |
|                                                                   |                  |                                                                   |               | high               |  | <b>1</b>   | OR      |
| adjusted for Sex, Age, Education, Occupation, and Economic Status |                  |                                                                   |               |                    |  |            |         |

**Tonstad et al. (2013)** - Funded by the National Institutes of Health; The Fogarty International Center

|                                                               |      |                                          |                   |                                                         |       |                   |             |           |
|---------------------------------------------------------------|------|------------------------------------------|-------------------|---------------------------------------------------------|-------|-------------------|-------------|-----------|
| cross-sectional 5,592                                         | high | Data from smokers identified in the 2006 | <b>Education</b>  | <b>Quit tobacco</b>                                     | 4,727 | Low (<6 years)    | <b>1</b>    | OR        |
| Cambodia                                                      |      | National Tobacco Survey. Aged >18 years  |                   | not used tobacco products for >2 years among ever-users | 840   | High (>7 years)   | <b>1.46</b> | 1.01-2.13 |
|                                                               |      |                                          | <b>Income</b>     | <b>Quit tobacco</b>                                     | 3,919 | Low (<US\$1/day)  | <b>1</b>    | OR        |
|                                                               |      |                                          |                   |                                                         | 1,673 | High (>US\$1/day) | <b>1.39</b> | 1.01-1.91 |
|                                                               |      |                                          | <b>Occupation</b> | <b>Quit tobacco</b>                                     | 616   | None              | <b>1</b>    | OR        |
|                                                               |      |                                          |                   |                                                         | 93    | Professional      | <b>2.52</b> | 1.27-5.01 |
|                                                               |      |                                          |                   |                                                         | 167   | Technical/Service | <b>1.32</b> | 0.7-2.51  |
|                                                               |      |                                          |                   |                                                         | 467   | Labour            | <b>1.98</b> | 1.1-3.56  |
| adjusted for age, demographics, health status characteristics |      |                                          |                   |                                                         |       |                   |             |           |

**Ahmad et al. (2005)** - Funded by the Fogarty International Centre; National Institutes of Health (USA)

|                                                         |          |                                                                                    |                        |                                                       |       |                 |             |           |
|---------------------------------------------------------|----------|------------------------------------------------------------------------------------|------------------------|-------------------------------------------------------|-------|-----------------|-------------|-----------|
| cross-sectional 8,328                                   | moderate | Data from the five biggest tribes taken from the 1990-1994 National Health Survey. | <b>Wealth (assets)</b> | <b>Smoker</b>                                         | 2,523 | Low (assets)    | <b>1</b>    | OR        |
| Pakistan                                                |          | Aged >15 years                                                                     |                        | current smoker and has smoked >100 cigarettes/beddies | 4,199 | Middle (assets) | <b>1.03</b> | 0.88-1.2  |
|                                                         |          |                                                                                    |                        |                                                       | 1,606 | High (assets)   | <b>1.13</b> | 0.92-1.39 |
|                                                         |          |                                                                                    | <b>Literacy</b>        | <b>Smoker</b>                                         | 2,861 | Literate        | <b>1</b>    | OR        |
|                                                         |          |                                                                                    |                        |                                                       | 5,467 | Illiterate      | <b>0.69</b> | 0.59-0.8  |
| adjusted for age, ethnicity, sex, literacy, urban/rural |          |                                                                                    |                        |                                                       |       |                 |             |           |

**Ali et al. (2006)** - Source of funding not reported

|                     |      |                                          |                  |                            |     |                          |            |         |
|---------------------|------|------------------------------------------|------------------|----------------------------|-----|--------------------------|------------|---------|
| cross-sectional 411 | high | Men from a rural area of Sindh province. | <b>Education</b> | <b>Smoker</b>              | 104 | High (>10 years)         | <b>1</b>   | OR      |
| Pakistan            |      | Aged >18 years                           |                  | has smoked >100 cigarettes | 95  | Medium-high (6-10 years) | <b>1.1</b> | 0.9-1.6 |
|                     |      |                                          |                  |                            | 92  | Medium-low (1-5 years)   | <b>1.1</b> | 0.9-1.4 |

## Tobacco

|  |  |  |                                            |     |                                          |            |         |
|--|--|--|--------------------------------------------|-----|------------------------------------------|------------|---------|
|  |  |  |                                            | 120 | Low (Illiterate)                         | <b>1.1</b> | 0.9-1.5 |
|  |  |  | <b>Income (average, individual) Smoker</b> | 98  | Low (no income)                          | <b>1</b>   | OR      |
|  |  |  |                                            | 114 | Medium-low (<US\$30/month)               | <b>1.4</b> | 1.0-2.1 |
|  |  |  |                                            | 151 | Medium-high (US\$30-60/month)            | <b>1.4</b> | 1.0-2.1 |
|  |  |  |                                            | 48  | High (>US\$60/month)                     | <b>1.7</b> | 1.2-2.6 |
|  |  |  |                                            |     | adjusted for age, income, marital status |            |         |

**Channa and Khan (2014)** - Source of funding not reported

|              |     |     |                                                                                                                     |                 |                                           |                         |              |       |
|--------------|-----|-----|---------------------------------------------------------------------------------------------------------------------|-----------------|-------------------------------------------|-------------------------|--------------|-------|
| case-control | 233 | low | 114 male manipuri chewers (chewed mainpuri for 5-8 years) from Hyderabad and 119 matched controls. Aged 15-45 years | <b>Literacy</b> | <b>Mainpuri use</b>                       | Literate                | <b>1</b>     | OR    |
| Pakistan     |     |     |                                                                                                                     |                 | 1-2 packets/day (18g) using for 5-8 years | Illiterate              | <b>4.225</b> | <0.01 |
|              |     |     |                                                                                                                     |                 |                                           | No adjustment described |              |       |

**Abd-Elhady et al. (2007)** - Source of funding not reported

|                 |     |     |                                                                         |                  |                                           |                         |               |  |
|-----------------|-----|-----|-------------------------------------------------------------------------|------------------|-------------------------------------------|-------------------------|---------------|--|
| cross-sectional | 283 | low | Diabetic patients attending Alf-Maskan outpatient clinic in East Cairo. | <b>Education</b> | <b>Smokes tobacco</b>                     | 78 High (undefined)     | <b>76.90%</b> |  |
| Egypt           |     |     | Age not reported                                                        |                  | continues to smoke despite medical advice | 160 Medium (undefined)  | <b>72.50%</b> |  |
|                 |     |     |                                                                         |                  |                                           | 45 Low (Illiterate)     | <b>82.20%</b> |  |
|                 |     |     |                                                                         | <b>Education</b> | <b>Quit smoking</b>                       | 78 High (undefined)     | <b>5.10%</b>  |  |
|                 |     |     |                                                                         |                  |                                           | 160 Medium (undefined)  | <b>3.10%</b>  |  |
|                 |     |     |                                                                         |                  |                                           | 45 Low (Illiterate)     | <b>4.40%</b>  |  |
|                 |     |     |                                                                         |                  |                                           | No adjustment described |               |  |

**Al Ali et al. (2011)** - Funded by the National Institute on Drug Abuse; EU grant Mediterranean studies of Cardiovascular disease and Hyperglycaemia

|                      |       |          |                                                  |                                                                     |                                            |                            |               |           |       |
|----------------------|-------|----------|--------------------------------------------------|---------------------------------------------------------------------|--------------------------------------------|----------------------------|---------------|-----------|-------|
| cross-sectional      | 1,168 | moderate | Representative sample of Aleppo residents from a | <b>Education</b>                                                    | <b>Smoker</b>                              | 351 Low (<6 years)         | <b>33.50%</b> | 28.3-39.1 | >0.05 |
| Syrian Arab Republic |       |          | 2006 survey.                                     |                                                                     | past month cigarette or water pipe smoking | 509 Medium (6-11 years)    | <b>44.60%</b> | 38.9-50.4 |       |
|                      |       |          | Aged >25 years                                   |                                                                     |                                            | 308 High (>12 years)       | <b>35.10%</b> | 30-40.6   |       |
|                      |       |          |                                                  | <b>SES (education, assets, employment status, household income)</b> | <b>Smoker</b>                              | 415 Low (tertile score)    | <b>35.40%</b> | 29.6-41.6 | <0.05 |
|                      |       |          |                                                  |                                                                     |                                            | 369 Medium (tertile score) | <b>39.40%</b> | 34.4-44.7 |       |
|                      |       |          |                                                  |                                                                     |                                            | 384 High (tertile score)   | <b>42.60%</b> | 36.8-48.7 |       |

## Tobacco

|                                                                                                                                                    |         | Employment | Smoker                                                                            |                                     |                                    |                          |                          |
|----------------------------------------------------------------------------------------------------------------------------------------------------|---------|------------|-----------------------------------------------------------------------------------|-------------------------------------|------------------------------------|--------------------------|--------------------------|
|                                                                                                                                                    |         |            |                                                                                   | 624 Employed                        |                                    | <b>56.50%</b>            | 48.1-64.5 <0.05          |
|                                                                                                                                                    |         |            |                                                                                   | 544 Unemployed                      |                                    | <b>23.50%</b>            | 19.1-28.5                |
|                                                                                                                                                    |         |            |                                                                                   | No adjustment described             |                                    |                          |                          |
| <b>Laux (2014)</b> -Funded by National Institutes of Health (USA); University of Pittsburgh School of Medicine; National Center for Research (USA) |         |            |                                                                                   |                                     |                                    |                          |                          |
| cross-sectional                                                                                                                                    | 1,355   | moderate   | Six communities in central and western Nicaragua. Aged 20-60 years                | <b>Income (US\$/dependent/day)</b>  | <b>Ever smoker</b>                 | Extremely Low (<\$1/day) | <b>1</b> OR              |
| Nicaragua                                                                                                                                          |         |            |                                                                                   |                                     | ever smoked tobacco                | Low (\$1-2/day)          | <b>1.1</b> 0.73-1.65     |
|                                                                                                                                                    |         |            |                                                                                   |                                     |                                    | Higher (\$>2/day)        | <b>0.91</b> 0.54-1.53    |
| adjusted for age, sex, living history                                                                                                              |         |            |                                                                                   |                                     |                                    |                          |                          |
| <b>Hosseinpoor et al. (2012)</b> - Funded by WHO                                                                                                   |         |            |                                                                                   |                                     |                                    |                          |                          |
| cross-sectional                                                                                                                                    | 213,807 | high       | Reports data from 48 LMICs taken from the 2003 World Health Survey Aged >18 years | <b>SES (men) assets, services</b>   | <b>Smoker</b>                      | <b>Georgia</b>           | Lowest <b>50.10%</b> 6   |
| Global                                                                                                                                             |         |            |                                                                                   |                                     | daily or occasional tobacco smoker | Low                      | <b>59.00%</b> 4.3        |
|                                                                                                                                                    |         |            |                                                                                   |                                     |                                    | Medium                   | <b>58.30%</b> 3.5        |
|                                                                                                                                                    |         |            |                                                                                   |                                     |                                    | High                     | <b>63.40%</b> 4          |
|                                                                                                                                                    |         |            |                                                                                   |                                     |                                    | Highest                  | <b>67.20%</b> 2.8        |
|                                                                                                                                                    |         |            |                                                                                   | <b>SES (women) assets, services</b> | <b>Smoker</b>                      | <b>Georgia</b>           | Lowest <b>1.90%</b> 1.1  |
|                                                                                                                                                    |         |            |                                                                                   |                                     | daily or occasional tobacco smoker | Low                      | <b>2.40%</b> 1.1         |
|                                                                                                                                                    |         |            |                                                                                   |                                     |                                    | Medium                   | <b>4.80%</b> 1.8         |
|                                                                                                                                                    |         |            |                                                                                   |                                     |                                    | High                     | <b>8.20%</b> 2.5         |
|                                                                                                                                                    |         |            |                                                                                   |                                     |                                    | Highest                  | <b>11.60%</b> 2.6        |
|                                                                                                                                                    |         |            |                                                                                   | <b>SES (men) assets, services</b>   | <b>Smoker</b>                      | <b>Morocco</b>           | Lowest <b>40.30%</b> 4.7 |
|                                                                                                                                                    |         |            |                                                                                   |                                     | daily or occasional tobacco smoker | Low                      | <b>34.00%</b> 3.8        |
|                                                                                                                                                    |         |            |                                                                                   |                                     |                                    | Medium                   | <b>38.40%</b> 5.4        |
|                                                                                                                                                    |         |            |                                                                                   |                                     |                                    | High                     | <b>31.20%</b> 4.8        |
|                                                                                                                                                    |         |            |                                                                                   |                                     |                                    | Highest                  | <b>17.50%</b> 3.5        |
|                                                                                                                                                    |         |            |                                                                                   | <b>SES (women) assets, services</b> | <b>Smoker</b>                      | <b>Morocco</b>           | Lowest <b>0.00%</b> 0    |
|                                                                                                                                                    |         |            |                                                                                   |                                     | daily or occasional tobacco smoker | Low                      | <b>0.40%</b> 0.3         |
|                                                                                                                                                    |         |            |                                                                                   |                                     |                                    | Medium                   | <b>0.00%</b> 0           |
|                                                                                                                                                    |         |            |                                                                                   |                                     |                                    | High                     | <b>0.30%</b> 0.3         |

## Tobacco

|                                     |                                                        |                    |         |               |                |
|-------------------------------------|--------------------------------------------------------|--------------------|---------|---------------|----------------|
|                                     |                                                        |                    | Highest | <b>0.00%</b>  | 0              |
|                                     |                                                        |                    |         |               | Standard Error |
| <b>SES (men) assets, services</b>   | <b>Smoker</b><br>daily or occasional<br>tobacco smoker | <b>Paraguay</b>    | Lowest  | <b>62.40%</b> | 2.6            |
|                                     |                                                        |                    | Low     | <b>47.90%</b> | 2.6            |
|                                     |                                                        |                    | Medium  | <b>43.80%</b> | 2.8            |
|                                     |                                                        |                    | High    | <b>28.40%</b> | 2.5            |
|                                     |                                                        |                    | Highest | <b>33.10%</b> | 2.9            |
| <b>SES (women) assets, services</b> | <b>Smoker</b><br>daily or occasional<br>tobacco smoker | <b>Paraguay</b>    | Lowest  | <b>17.90%</b> | 1.9            |
|                                     |                                                        |                    | Low     | <b>16.30%</b> | 1.9            |
|                                     |                                                        |                    | Medium  | <b>14.30%</b> | 1.8            |
|                                     |                                                        |                    | High    | <b>9.70%</b>  | 1.3            |
|                                     |                                                        |                    | Highest | <b>12.20%</b> | 1.5            |
|                                     |                                                        |                    |         |               | Standard Error |
| <b>SES (men) assets, services</b>   | <b>Smoker</b><br>daily or occasional<br>tobacco smoker | <b>Phillipines</b> | Lowest  | <b>67.90%</b> | 2.22           |
|                                     |                                                        |                    | Low     | <b>60.60%</b> | 2.4            |
|                                     |                                                        |                    | Medium  | <b>57.30%</b> | 2.2            |
|                                     |                                                        |                    | High    | <b>55.60%</b> | 2.2            |
|                                     |                                                        |                    | Highest | <b>50.20%</b> | 2.3            |
| <b>SES (women) assets, services</b> | <b>Smoker</b><br>daily or occasional<br>tobacco smoker | <b>Phillipines</b> | Lowest  | <b>17.20%</b> | 1.7            |
|                                     |                                                        |                    | Low     | <b>14.40%</b> | 1.4            |
|                                     |                                                        |                    | Medium  | <b>12.10%</b> | 1.2            |
|                                     |                                                        |                    | High    | <b>12.10%</b> | 1.3            |
|                                     |                                                        |                    | Highest | <b>8.80%</b>  | 1.3            |
|                                     |                                                        |                    |         |               | Standard Error |
| <b>SES (men) assets, services</b>   | <b>Smoker</b><br>daily or occasional<br>tobacco smoker | <b>Sri Lanka</b>   | Lowest  | <b>56.10%</b> | 4.5            |
|                                     |                                                        |                    | Low     | <b>49.50%</b> | 3.6            |
|                                     |                                                        |                    | Medium  | <b>45.50%</b> | 3.1            |
|                                     |                                                        |                    | High    | <b>38.00%</b> | 2.3            |
|                                     |                                                        |                    | Highest | <b>29.90%</b> | 3.9            |
| <b>SES (women) assets, services</b> | <b>Smoker</b><br>daily or occasional<br>tobacco smoker | <b>Sri Lanka</b>   | Lowest  | <b>6.40%</b>  | 1.9            |
|                                     |                                                        |                    | Low     | <b>4.70%</b>  | 1.5            |
|                                     |                                                        |                    | Medium  | <b>3.00%</b>  | 1              |
|                                     |                                                        |                    | High    | <b>1.70%</b>  | 0.6            |

## Tobacco

|                                     |                                    |                   |         |               |                |
|-------------------------------------|------------------------------------|-------------------|---------|---------------|----------------|
|                                     |                                    |                   | Highest | <b>2.40%</b>  | 1              |
|                                     |                                    |                   |         |               | Standard Error |
| <b>SES (men) assets, services</b>   | <b>Smoker</b>                      | <b>Swaziland</b>  | Lowest  | <b>19.90%</b> | 6.4            |
|                                     | daily or occasional tobacco smoker |                   | Low     | <b>10.70%</b> | 2.8            |
|                                     |                                    |                   | Medium  | <b>14.80%</b> | 5.4            |
|                                     |                                    |                   | High    | <b>14.30%</b> | 5.2            |
|                                     |                                    |                   | Highest | <b>16.50%</b> | 3.9            |
| <b>SES (women) assets, services</b> | <b>Smoker</b>                      | <b>Swaziland</b>  | Lowest  | <b>8.80%</b>  | 3.4            |
|                                     | daily or occasional tobacco smoker |                   | Low     | <b>1.70%</b>  | 0.9            |
|                                     |                                    |                   | Medium  | <b>0.20%</b>  | 0.2            |
|                                     |                                    |                   | High    | <b>4.10%</b>  | 1.6            |
|                                     |                                    |                   | Highest | <b>2.30%</b>  | 2.3            |
|                                     |                                    |                   |         |               | Standard Error |
| <b>SES (men) assets, services</b>   | <b>Smoker</b>                      | <b>Ukraine</b>    | Lowest  | <b>55.30%</b> | 6              |
|                                     | daily or occasional tobacco smoker |                   | Low     | <b>48.80%</b> | 4.5            |
|                                     |                                    |                   | Medium  | <b>53.80%</b> | 4.4            |
|                                     |                                    |                   | High    | <b>57.90%</b> | 4              |
|                                     |                                    |                   | Highest | <b>54.90%</b> | 4.3            |
| <b>SES (women) assets, services</b> | <b>Smoker</b>                      | <b>Ukraine</b>    | Lowest  | <b>7.70%</b>  | 1.8            |
|                                     | daily or occasional tobacco smoker |                   | Low     | <b>6.10%</b>  | 1.4            |
|                                     |                                    |                   | Medium  | <b>12.00%</b> | 2.3            |
|                                     |                                    |                   | High    | <b>13.20%</b> | 3              |
|                                     |                                    |                   | Highest | <b>14.00%</b> | 2.2            |
|                                     |                                    |                   |         |               | Standard Error |
| <b>SES (men) assets, services</b>   | <b>Smoker</b>                      | <b>Bangladesh</b> | Lowest  | <b>72.20%</b> | 2.9            |
|                                     | daily or occasional tobacco smoker |                   | Low     | <b>4.10%</b>  | 2.9            |
|                                     |                                    |                   | Medium  | <b>57.60%</b> | 2.8            |
|                                     |                                    |                   | High    | <b>48.60%</b> | 2.7            |
|                                     |                                    |                   | Highest | <b>44.20%</b> | 2.6            |
| <b>SES (women) assets, services</b> | <b>Smoker</b>                      | <b>Bangladesh</b> | Lowest  | <b>8.20%</b>  | 1.5            |
|                                     | daily or occasional tobacco smoker |                   | Low     | <b>6.00%</b>  | 1.2            |
|                                     |                                    |                   | Medium  | <b>8.30%</b>  | 1.5            |
|                                     |                                    |                   | High    | <b>5.90%</b>  | 1.6            |

## Tobacco

|                                     |                                                        | Standard Error      |         |               |     |
|-------------------------------------|--------------------------------------------------------|---------------------|---------|---------------|-----|
| <b>SES (men) assets, services</b>   | <b>Smoker</b><br>daily or occasional<br>tobacco smoker | <b>Burkina Faso</b> | Lowest  | <b>29.90%</b> | 3.4 |
|                                     |                                                        |                     | Low     | <b>25.80%</b> | 2.8 |
|                                     |                                                        |                     | Medium  | <b>21.60%</b> | 2.5 |
|                                     |                                                        |                     | High    | <b>17.50%</b> | 2.5 |
|                                     |                                                        |                     | Highest | <b>26.20%</b> | 3.5 |
| <b>SES (women) assets, services</b> | <b>Smoker</b><br>daily or occasional<br>tobacco smoker | <b>Burkina Faso</b> | Lowest  | <b>12.60%</b> | 2.4 |
|                                     |                                                        |                     | Low     | <b>14.10%</b> | 2.4 |
|                                     |                                                        |                     | Medium  | <b>10.90%</b> | 2.1 |
|                                     |                                                        |                     | High    | <b>10.50%</b> | 2.2 |
|                                     |                                                        |                     | Highest | <b>8.20%</b>  | 2.9 |
| <b>SES (men) assets, services</b>   | <b>Smoker</b><br>daily or occasional<br>tobacco smoker | <b>Chad</b>         | Lowest  | <b>22.80%</b> | 4   |
|                                     |                                                        |                     | Low     | <b>19.90%</b> | 3.2 |
|                                     |                                                        |                     | Medium  | <b>19.30%</b> | 3.2 |
|                                     |                                                        |                     | High    | <b>18.20%</b> | 2.3 |
|                                     |                                                        |                     | Highest | <b>14.80%</b> | 2   |
| <b>SES (women) assets, services</b> | <b>Smoker</b><br>daily or occasional<br>tobacco smoker | <b>Chad</b>         | Lowest  | <b>1.60%</b>  | 0.7 |
|                                     |                                                        |                     | Low     | <b>5.10%</b>  | 2   |
|                                     |                                                        |                     | Medium  | <b>2.70%</b>  | 1.1 |
|                                     |                                                        |                     | High    | <b>3.80%</b>  | 2   |
|                                     |                                                        |                     | Highest | <b>3.60%</b>  | 1.2 |
| <b>SES (men) assets, services</b>   | <b>Smoker</b><br>daily or occasional<br>tobacco smoker | <b>Comoros</b>      | Lowest  | <b>39.00%</b> | 8   |
|                                     |                                                        |                     | Low     | <b>37.90%</b> | 6.5 |
|                                     |                                                        |                     | Medium  | <b>31.60%</b> | 4.6 |
|                                     |                                                        |                     | High    | <b>39.50%</b> | 6   |
|                                     |                                                        |                     | Highest | <b>32.40%</b> | 5.5 |
| <b>SES (women) assets, services</b> | <b>Smoker</b><br>daily or occasional<br>tobacco smoker | <b>Comoros</b>      | Lowest  | <b>38.30%</b> | 8.7 |
|                                     |                                                        |                     | Low     | <b>14.70%</b> | 5.5 |
|                                     |                                                        |                     | Medium  | <b>21.10%</b> | 6.8 |
|                                     |                                                        |                     | High    | <b>16.30%</b> | 5.9 |
|                                     |                                                        |                     | Highest | <b>20.20%</b> | 8.7 |



## Tobacco

|                                     |                                                        |                      |         |               | Standard Error |
|-------------------------------------|--------------------------------------------------------|----------------------|---------|---------------|----------------|
| <b>SES (men) assets, services</b>   | <b>Smoker</b><br>daily or occasional<br>tobacco smoker | <b>Congo</b>         | Lowest  | <b>31.20%</b> | 5.8            |
|                                     |                                                        |                      | Low     | <b>28.60%</b> | 4.8            |
|                                     |                                                        |                      | Medium  | <b>17.70%</b> | 4.5            |
|                                     |                                                        |                      | High    | <b>10.70%</b> | 3.4            |
|                                     |                                                        |                      | Highest | <b>9.90%</b>  | 4.2            |
| <b>SES (women) assets, services</b> | <b>Smoker</b><br>daily or occasional<br>tobacco smoker | <b>Congo</b>         | Lowest  | <b>4.90%</b>  | 2.5            |
|                                     |                                                        |                      | Low     | <b>0.90%</b>  | 0.5            |
|                                     |                                                        |                      | Medium  | <b>2.90%</b>  | 1.8            |
|                                     |                                                        |                      | High    | <b>1.40%</b>  | 0.7            |
|                                     |                                                        |                      | Highest | <b>0.30%</b>  | 0.3            |
| <b>SES (men) assets, services</b>   | <b>Smoker</b><br>daily or occasional<br>tobacco smoker | <b>Cote d'Ivoire</b> | Lowest  | <b>28.00%</b> | 3              |
|                                     |                                                        |                      | Low     | <b>21.30%</b> | 2.8            |
|                                     |                                                        |                      | Medium  | <b>22.00%</b> | 2.8            |
|                                     |                                                        |                      | High    | <b>19.50%</b> | 2.8            |
|                                     |                                                        |                      | Highest | <b>18.00%</b> | 33.1           |
| <b>SES (women) assets, services</b> | <b>Smoker</b><br>daily or occasional<br>tobacco smoker | <b>Cote d'Ivoire</b> | Lowest  | <b>3.40%</b>  | 1.6            |
|                                     |                                                        |                      | Low     | <b>5.10%</b>  | 1.8            |
|                                     |                                                        |                      | Medium  | <b>3.90%</b>  | 1.3            |
|                                     |                                                        |                      | High    | <b>1.80%</b>  | 0.8            |
|                                     |                                                        |                      | Highest | <b>1.10%</b>  | 0.6            |
| <b>SES (men) assets, services</b>   | <b>Smoker</b><br>daily or occasional<br>tobacco smoker | <b>Ethiopia</b>      | Lowest  | <b>5.30%</b>  | 2              |
|                                     |                                                        |                      | Low     | <b>9.50%</b>  | 2.2            |
|                                     |                                                        |                      | Medium  | <b>8.10%</b>  | 1.8            |
|                                     |                                                        |                      | High    | <b>8.80%</b>  | 4.8            |
|                                     |                                                        |                      | Highest | <b>4.80%</b>  | 1.2            |
| <b>SES (women) assets, services</b> | <b>Smoker</b><br>daily or occasional<br>tobacco smoker | <b>Ethiopia</b>      | Lowest  | <b>0.40%</b>  | 0.4            |
|                                     |                                                        |                      | Low     | <b>1.20%</b>  | 0.6            |
|                                     |                                                        |                      | Medium  | <b>0.70%</b>  | 0.4            |
|                                     |                                                        |                      | High    | <b>0.60%</b>  | 0.4            |
|                                     |                                                        |                      | Highest | <b>0.10%</b>  | 0.1            |

## Tobacco

|                                     |                                                        |              |         |               | Standard Error |
|-------------------------------------|--------------------------------------------------------|--------------|---------|---------------|----------------|
| <b>SES (men) assets, services</b>   | <b>Smoker</b><br>daily or occasional<br>tobacco smoker | <b>Ghana</b> | Lowest  | <b>21.50%</b> | 3              |
|                                     |                                                        |              | Low     | <b>12.70%</b> | 1.9            |
|                                     |                                                        |              | Medium  | <b>9.60%</b>  | 1.8            |
|                                     |                                                        |              | High    | <b>6.10%</b>  | 1.3            |
|                                     |                                                        |              | Highest | <b>8.40%</b>  | 1.8            |
| <b>SES (women) assets, services</b> | <b>Smoker</b><br>daily or occasional<br>tobacco smoker | <b>Ghana</b> | Lowest  | <b>2.60%</b>  | 0.7            |
|                                     |                                                        |              | Low     | <b>1.40%</b>  | 0.7            |
|                                     |                                                        |              | Medium  | <b>0.90%</b>  | 0.7            |
|                                     |                                                        |              | High    | <b>0.70%</b>  | 0.4            |
|                                     |                                                        |              | Highest | <b>1.30%</b>  | 0.5            |
| <b>SES (men) assets, services</b>   | <b>Smoker</b><br>daily or occasional<br>tobacco smoker | <b>India</b> | Lowest  | <b>46.70%</b> | 3.2            |
|                                     |                                                        |              | Low     | <b>45.80%</b> | 2.9            |
|                                     |                                                        |              | Medium  | <b>37.80%</b> | 3.8            |
|                                     |                                                        |              | High    | <b>23.50%</b> | 2.9            |
|                                     |                                                        |              | Highest | <b>21.80%</b> | 3.1            |
| <b>SES (women) assets, services</b> | <b>Smoker</b><br>daily or occasional<br>tobacco smoker | <b>India</b> | Lowest  | <b>12.40%</b> | 3.7            |
|                                     |                                                        |              | Low     | <b>8.60%</b>  | 1.8            |
|                                     |                                                        |              | Medium  | <b>8.40%</b>  | 1.7            |
|                                     |                                                        |              | High    | <b>4.30%</b>  | 1.1            |
|                                     |                                                        |              | Highest | <b>3.10%</b>  | 1              |
| <b>SES (men) assets, services</b>   | <b>Smoker</b><br>daily or occasional<br>tobacco smoker | <b>Kenya</b> | Lowest  | <b>33.10%</b> | 5.4            |
|                                     |                                                        |              | Low     | <b>26.90%</b> | 4              |
|                                     |                                                        |              | Medium  | <b>25.20%</b> | 3.9            |
|                                     |                                                        |              | High    | <b>25.60%</b> | 4              |
|                                     |                                                        |              | Highest | <b>26.70%</b> | 5.5            |
| <b>SES (women) assets, services</b> | <b>Smoker</b><br>daily or occasional<br>tobacco smoker | <b>Kenya</b> | Lowest  | <b>3.20%</b>  | 0.9            |
|                                     |                                                        |              | Low     | <b>3.30%</b>  | 1              |
|                                     |                                                        |              | Medium  | <b>3.80%</b>  | 2.3            |
|                                     |                                                        |              | High    | <b>0.80%</b>  | 0.4            |
|                                     |                                                        |              | Highest | <b>0.20%</b>  | 0.2            |

## Tobacco

|                                     |                                                        |                     |         | Standard Error |     |
|-------------------------------------|--------------------------------------------------------|---------------------|---------|----------------|-----|
| <b>SES (men) assets, services</b>   | <b>Smoker</b><br>daily or occasional<br>tobacco smoker | <b>Lao People's</b> | Lowest  | <b>77.10%</b>  | 2.9 |
|                                     |                                                        |                     | Low     | <b>72.70%</b>  | 2.7 |
|                                     |                                                        |                     | Medium  | <b>61.00%</b>  | 3.2 |
|                                     |                                                        |                     | High    | <b>62.70%</b>  | 2.9 |
|                                     |                                                        |                     | Highest | <b>41.50%</b>  | 2.8 |
| <b>SES (women) assets, services</b> | <b>Smoker</b><br>daily or occasional<br>tobacco smoker | <b>Lao People's</b> | Lowest  | <b>28.30%</b>  | 3.6 |
|                                     |                                                        |                     | Low     | <b>17.80%</b>  | 2.4 |
|                                     |                                                        |                     | Medium  | <b>12.70%</b>  | 2.1 |
|                                     |                                                        |                     | High    | <b>5.00%</b>   | 1.3 |
|                                     |                                                        |                     | Highest | <b>1.80%</b>   | 0.8 |
| <b>SES (men) assets, services</b>   | <b>Smoker</b><br>daily or occasional<br>tobacco smoker | <b>Malawi</b>       | Lowest  | <b>40.90%</b>  | 3.2 |
|                                     |                                                        |                     | Low     | <b>34.90%</b>  | 2.7 |
|                                     |                                                        |                     | Medium  | <b>24.00%</b>  | 3.3 |
|                                     |                                                        |                     | High    | <b>15.90%</b>  | 2.4 |
|                                     |                                                        |                     | Highest | <b>13.30%</b>  | 2.7 |
| <b>SES (women) assets, services</b> | <b>Smoker</b><br>daily or occasional<br>tobacco smoker | <b>Malawi</b>       | Lowest  | <b>9.50%</b>   | 1.5 |
|                                     |                                                        |                     | Low     | <b>7.50%</b>   | 1.6 |
|                                     |                                                        |                     | Medium  | <b>6.80%</b>   | 1.5 |
|                                     |                                                        |                     | High    | <b>3.50%</b>   | 1.1 |
|                                     |                                                        |                     | Highest | <b>0.70%</b>   | 0.5 |
| <b>SES (men) assets, services</b>   | <b>Smoker</b><br>daily or occasional<br>tobacco smoker | <b>Mali</b>         | Lowest  | <b>27.30%</b>  | 3.2 |
|                                     |                                                        |                     | Low     | <b>28.20%</b>  | 3.2 |
|                                     |                                                        |                     | Medium  | <b>24.70%</b>  | 2.7 |
|                                     |                                                        |                     | High    | <b>24.20%</b>  | 2.5 |
|                                     |                                                        |                     | Highest | <b>25.90%</b>  | 3.1 |
| <b>SES (women) assets, services</b> | <b>Smoker</b><br>daily or occasional<br>tobacco smoker | <b>Mali</b>         | Lowest  | <b>4.00%</b>   | 1.6 |
|                                     |                                                        |                     | Low     | <b>3.80%</b>   | 1.6 |
|                                     |                                                        |                     | Medium  | <b>3.50%</b>   | 1.3 |
|                                     |                                                        |                     | High    | <b>2.90%</b>   | 1.1 |

## Tobacco

|                                     |                                    |                   |         |               |                |
|-------------------------------------|------------------------------------|-------------------|---------|---------------|----------------|
|                                     |                                    |                   | Highest | <b>0.50%</b>  | 0.5            |
|                                     |                                    |                   |         |               | Standard Error |
| <b>SES (men) assets, services</b>   | <b>Smoker</b>                      | <b>Mauritania</b> | Lowest  | <b>27.80%</b> | 4.3            |
|                                     | daily or occasional tobacco smoker |                   | Low     | <b>22.30%</b> | 4.3            |
|                                     |                                    |                   | Medium  | <b>23.40%</b> | 4              |
|                                     |                                    |                   | High    | <b>30.60%</b> | 4.2            |
|                                     |                                    |                   | Highest | <b>38.60%</b> | 4              |
| <b>SES (women) assets, services</b> | <b>Smoker</b>                      | <b>Mauritania</b> | Lowest  | <b>2.80%</b>  | 1.1            |
|                                     | daily or occasional tobacco smoker |                   | Low     | <b>1.60%</b>  | 0.8            |
|                                     |                                    |                   | Medium  | <b>5.60%</b>  | 2.2            |
|                                     |                                    |                   | High    | <b>7.20%</b>  | 1.8            |
|                                     |                                    |                   | Highest | <b>5.80%</b>  | 1.5            |
|                                     |                                    |                   |         |               | Standard Error |
| <b>SES (men) assets, services</b>   | <b>Smoker</b>                      | <b>Myanmar</b>    | Lowest  | <b>52.50%</b> | 3.9            |
|                                     | daily or occasional tobacco smoker |                   | Low     | <b>53.70%</b> | 3.2            |
|                                     |                                    |                   | Medium  | <b>46.00%</b> | 2.8            |
|                                     |                                    |                   | High    | <b>48.40%</b> | 2.5            |
|                                     |                                    |                   | Highest | <b>40.30%</b> | 2.5            |
| <b>SES (women) assets, services</b> | <b>Smoker</b>                      | <b>Myanmar</b>    | Lowest  | <b>21.80%</b> | 2.5            |
|                                     | daily or occasional tobacco smoker |                   | Low     | <b>18.20%</b> | 2.3            |
|                                     |                                    |                   | Medium  | <b>12.50%</b> | 1.5            |
|                                     |                                    |                   | High    | <b>8.50%</b>  | 1.1            |
|                                     |                                    |                   | Highest | <b>4.60%</b>  | 1              |
|                                     |                                    |                   |         |               | Standard Error |
| <b>SES (men) assets, services</b>   | <b>Smoker</b>                      | <b>Nepal</b>      | Lowest  | <b>43.70%</b> | 2.6            |
|                                     | daily or occasional tobacco smoker |                   | Low     | <b>36.80%</b> | 2.5            |
|                                     |                                    |                   | Medium  | <b>36.00%</b> | 2.2            |
|                                     |                                    |                   | High    | <b>30.40%</b> | 2.2            |
|                                     |                                    |                   | Highest | <b>26.00%</b> | 2              |
| <b>SES (women) assets, services</b> | <b>Smoker</b>                      | <b>Nepal</b>      | Lowest  | <b>28.50%</b> | 2.1            |
|                                     | daily or occasional tobacco smoker |                   | Low     | <b>25.60%</b> | 2              |
|                                     |                                    |                   | Medium  | <b>18.70%</b> | 1.5            |
|                                     |                                    |                   | High    | <b>17.90%</b> | 1.8            |

## Tobacco

|                                     |                                    |                 |         |               |                |
|-------------------------------------|------------------------------------|-----------------|---------|---------------|----------------|
|                                     |                                    |                 | Highest | <b>9.70%</b>  | 1.3            |
|                                     |                                    |                 |         |               | Standard Error |
| <b>SES (men) assets, services</b>   | <b>Smoker</b>                      | <b>Pakistan</b> | Lowest  | <b>40.50%</b> | 2.5            |
|                                     | daily or occasional tobacco smoker |                 | Low     | <b>35.40%</b> | 2.5            |
|                                     |                                    |                 | Medium  | <b>35.60%</b> | 2.7            |
|                                     |                                    |                 | High    | <b>32.00%</b> | 2.6            |
|                                     |                                    |                 | Highest | <b>19.10%</b> | 2.1            |
| <b>SES (women) assets, services</b> | <b>Smoker</b>                      | <b>Pakistan</b> | Lowest  | <b>7.40%</b>  | 1.5            |
|                                     | daily or occasional tobacco smoker |                 | Low     | <b>6.80%</b>  | 1.3            |
|                                     |                                    |                 | Medium  | <b>7.40%</b>  | 1.8            |
|                                     |                                    |                 | High    | <b>6.30%</b>  | 1.6            |
|                                     |                                    |                 | Highest | <b>3.80%</b>  | 1.2            |
|                                     |                                    |                 |         |               | Standard Error |
| <b>SES (men) assets, services</b>   | <b>Smoker</b>                      | <b>Senegal</b>  | Lowest  | <b>28.90%</b> | 4.6            |
|                                     | daily or occasional tobacco smoker |                 | Low     | <b>25.50%</b> | 4.7            |
|                                     |                                    |                 | Medium  | <b>24.40%</b> | 4              |
|                                     |                                    |                 | High    | <b>21.20%</b> | 4.1            |
|                                     |                                    |                 | Highest | <b>26.30%</b> | 3.8            |
| <b>SES (women) assets, services</b> | <b>Smoker</b>                      | <b>Senegal</b>  | Lowest  | <b>4.70%</b>  | 2              |
|                                     | daily or occasional tobacco smoker |                 | Low     | <b>0.00%</b>  | 0              |
|                                     |                                    |                 | Medium  | <b>0.40%</b>  | 0.4            |
|                                     |                                    |                 | High    | <b>0.50%</b>  | 0.4            |
|                                     |                                    |                 | Highest | <b>1.90%</b>  | 1.4            |
|                                     |                                    |                 |         |               | Standard Error |
| <b>SES (men) assets, services</b>   | <b>Smoker</b>                      | <b>Vietnam</b>  | Lowest  | <b>66.90%</b> | 3.5            |
|                                     | daily or occasional tobacco smoker |                 | Low     | <b>59.80%</b> | 4.3            |
|                                     |                                    |                 | Medium  | <b>43.00%</b> | 5.6            |
|                                     |                                    |                 | High    | <b>45.00%</b> | 4.2            |
|                                     |                                    |                 | Highest | <b>46.70%</b> | 4.7            |
| <b>SES (women) assets, services</b> | <b>Smoker</b>                      | <b>Vietnam</b>  | Lowest  | <b>3.20%</b>  | 1.2            |
|                                     | daily or occasional tobacco smoker |                 | Low     | <b>2.10%</b>  | 0.8            |
|                                     |                                    |                 | Medium  | <b>2.20%</b>  | 0.8            |
|                                     |                                    |                 | High    | <b>3.40%</b>  | 1.4            |

## Tobacco

|                                     |                                    |                 |                         |               |                |
|-------------------------------------|------------------------------------|-----------------|-------------------------|---------------|----------------|
|                                     |                                    |                 | Highest                 | <b>1.80%</b>  | 1.2            |
|                                     |                                    |                 |                         |               | Standard Error |
| <b>SES (men) assets, services</b>   | <b>Smoker</b>                      | <b>Zambia</b>   | Lowest                  | <b>36.80%</b> | 3.5            |
|                                     | daily or occasional tobacco smoker |                 | Low                     | <b>27.50%</b> | 2.6            |
|                                     |                                    |                 | Medium                  | <b>21.50%</b> | 2.5            |
|                                     |                                    |                 | High                    | <b>22.90%</b> | 2.7            |
|                                     |                                    |                 | Highest                 | <b>13.00%</b> | 2.1            |
| <b>SES (women) assets, services</b> | <b>Smoker</b>                      | <b>Zambia</b>   | Lowest                  | <b>11.50%</b> | 1.6            |
|                                     | daily or occasional tobacco smoker |                 | Low                     | <b>7.90%</b>  | 2.3            |
|                                     |                                    |                 | Medium                  | <b>2.60%</b>  | 1              |
|                                     |                                    |                 | High                    | <b>3.40%</b>  | 1.2            |
|                                     |                                    |                 | Highest                 | <b>3.90%</b>  | 1.5            |
|                                     |                                    |                 |                         |               | Standard Error |
| <b>SES (men) assets, services</b>   | <b>Smoker</b>                      | <b>Zimbabwe</b> | Lowest                  | <b>37.30%</b> | 4.5            |
|                                     | daily or occasional tobacco smoker |                 | Low                     | <b>29.60%</b> | 3.9            |
|                                     |                                    |                 | Medium                  | <b>26.40%</b> | 3.7            |
|                                     |                                    |                 | High                    | <b>20.00%</b> | 2.8            |
|                                     |                                    |                 | Highest                 | <b>23.50%</b> | 2.8            |
| <b>SES (women) assets, services</b> | <b>Smoker</b>                      | <b>Zimbabwe</b> | Lowest                  | <b>6.40%</b>  | 2              |
|                                     | daily or occasional tobacco smoker |                 | Low                     | <b>3.60%</b>  | 1              |
|                                     |                                    |                 | Medium                  | <b>3.10%</b>  | 0.8            |
|                                     |                                    |                 | High                    | <b>1.90%</b>  | 0.7            |
|                                     |                                    |                 | Highest                 | <b>1.70%</b>  | 0.8            |
|                                     |                                    |                 | No adjustment described |               |                |

*variables; age, marital status, education, employment, urban/rural*

## Search strategy

| EMBASE search strategy Restrictions: published post 1990 |                                                                                                                                      |
|----------------------------------------------------------|--------------------------------------------------------------------------------------------------------------------------------------|
| 1                                                        | cardiovascular disease/ or heart disease/ or vascular disease/ or cerebrovascular disease/                                           |
| 2                                                        | exp ischemic heart disease/ or exp myocardial disease/                                                                               |
| 3                                                        | Heart Failure/                                                                                                                       |
| 4                                                        | cerebrovascular accident/                                                                                                            |
| 5                                                        | non insulin dependent diabetes mellitus/                                                                                             |
| 6                                                        | chronic obstructive lung disease/                                                                                                    |
| 7                                                        | exp *Neoplasm/                                                                                                                       |
| 8                                                        | ((cardiovascular or cardio-vascular) adj3 disease*).ti,ab.                                                                           |
| 9                                                        | ((cardiovascular or cardio-vascular) adj3 (event* or outcome* or risk*)).ti,ab.                                                      |
| 10                                                       | ((coronary or heart or myocard*) adj3 disease*).ti,ab.                                                                               |
| 11                                                       | ((coronary or heart or myocard*) adj3 (event* or outcome* or risk*)).ti,ab.                                                          |
| 12                                                       | ((ischaemic or ischemic or ischaemia or ischemia) adj3 disease*).ti,ab.                                                              |
| 13                                                       | ((ischaemic or ischemic or ischaemia or ischemia) adj3 (event* or outcome* or risk*)).ti,ab.                                         |
| 14                                                       | myocardial infarct*.ti,ab.                                                                                                           |
| 15                                                       | ((cerebrovascular or vascular) adj3 disease*).ti,ab.                                                                                 |
| 16                                                       | ((cerebrovascular or vascular) adj3 (event* or outcome* or risk*)).ti,ab.                                                            |
| 17                                                       | stroke.ti,ab.                                                                                                                        |
| 18                                                       | heart failure.ti,ab.                                                                                                                 |
| 19                                                       | diabet*.ti.                                                                                                                          |
| 20                                                       | ((type 2 or type ii or noninsulin dependent or non insulin dependent or adult onset or maturity onset or obes*) adj2 diabet*).ti,ab. |
| 21                                                       | (niddm or t2dm or tiidm).ti,ab.                                                                                                      |
| 22                                                       | (chronic adj2 (lung or pulmonary)).ti,ab.                                                                                            |
| 23                                                       | copd.ti,ab.                                                                                                                          |
| 24                                                       | (neoplas* or cancer* or carcinoma* or tumor* or tumour* or malignan* or leukaemia or leukemia or lymphoma?).ti,ab.                   |
| 25                                                       | 1 or 2 or 3 or 4 or 5 or 6 or 7 or 8 or 9 or 10 or 11 or 12 or 13 or 14 or 15 or 16 or 17 or 18 or 19 or 20 or 21 or 22 or 23 or 24  |
| 26                                                       | Poverty/                                                                                                                             |
| 27                                                       | socioeconomics/ or economic aspect/                                                                                                  |
| 28                                                       | Income/ or lowest income group/                                                                                                      |
| 29                                                       | gross national product/                                                                                                              |
| 30                                                       | Economic development/                                                                                                                |
| 31                                                       | salary/                                                                                                                              |
| 32                                                       | poverty.ti,ab.                                                                                                                       |
| 33                                                       | ((socioeconomic or socio-economic or economic) adj2 (factor? or inequalit* or indicator? or status or development)).ti,ab.           |
| 34                                                       | ((household? or house-hold? or family or families) adj3 (income or earning? or wage? or poor or wealth)).ti,ab.                      |
| 35                                                       | (gross domestic product or gross national product or gdp or gnp).ti,ab.                                                              |

|    |                                                                                                                                                                                                                                                                                                                                                                                                                                                                                                                                                                                                                                                                                                                                                                                                                                                                                                                                                                                                                                                                                                                                                                                                                                                                                                                                                                                                                                                                                                                                                                                                                                                                                                                                                                                                                                                                                                                                   |
|----|-----------------------------------------------------------------------------------------------------------------------------------------------------------------------------------------------------------------------------------------------------------------------------------------------------------------------------------------------------------------------------------------------------------------------------------------------------------------------------------------------------------------------------------------------------------------------------------------------------------------------------------------------------------------------------------------------------------------------------------------------------------------------------------------------------------------------------------------------------------------------------------------------------------------------------------------------------------------------------------------------------------------------------------------------------------------------------------------------------------------------------------------------------------------------------------------------------------------------------------------------------------------------------------------------------------------------------------------------------------------------------------------------------------------------------------------------------------------------------------------------------------------------------------------------------------------------------------------------------------------------------------------------------------------------------------------------------------------------------------------------------------------------------------------------------------------------------------------------------------------------------------------------------------------------------------|
| 36 | (unemploy* or (employment adj2 (status or indicator? or level?))).ti,ab.                                                                                                                                                                                                                                                                                                                                                                                                                                                                                                                                                                                                                                                                                                                                                                                                                                                                                                                                                                                                                                                                                                                                                                                                                                                                                                                                                                                                                                                                                                                                                                                                                                                                                                                                                                                                                                                          |
| 37 | 26 or 27 or 28 or 29 or 30 or 31 or 32 or 33 or 34 or 35 or 36                                                                                                                                                                                                                                                                                                                                                                                                                                                                                                                                                                                                                                                                                                                                                                                                                                                                                                                                                                                                                                                                                                                                                                                                                                                                                                                                                                                                                                                                                                                                                                                                                                                                                                                                                                                                                                                                    |
| 38 | Developing Country.sh.                                                                                                                                                                                                                                                                                                                                                                                                                                                                                                                                                                                                                                                                                                                                                                                                                                                                                                                                                                                                                                                                                                                                                                                                                                                                                                                                                                                                                                                                                                                                                                                                                                                                                                                                                                                                                                                                                                            |
| 39 | (Afghanistan or Angola or Armenia or Armenian or Bangladesh or Benin or Bhutan or Bolivia or Burkina Faso or Burkina Fasso or Upper Volta or Burundi or Urundi or Cambodia or Khmer Republic or Kampuchea or Cameroon or Cameroons or Cameron or Camerons or Cape Verde or Central African Republic or Chad or Comoros or Comoro Islands or Comores or Mayotte or Congo or Zaire or Cote d'Ivoire or Ivory Coast or Djibouti or French Somaliland or East Timor or East Timur or Timor Leste or Egypt or United Arab Republic or El Salvador or Eritrea or Ethiopia or Gabon or Gabonese Republic or Gambia or Gaza or Georgia Republic or Georgian Republic or Ghana or Gold Coast or Guatemala or Guinea or Guinea-Bisau or Guam or Guiana or Guyana or Haiti or Honduras or India or Maldives or Indonesia or Kenya or Kiribati or (Democratic People* adj2 Korea) or Kosovo or Kyrgyzstan or Kirghizia or Kyrgyz Republic or Kirghiz or Kirgizstan or Lao PDR or Laos or Lesotho or Basutoland or Liberia or Madagascar or Malawi or Nyasaland or Mali or Mauritania or Micronesia or Moldova or Moldovia or Moldovian or Mongolia or Morocco or Ifni or Mozambique or Myanmar or Myanma or Burma or Nepal or Netherlands Antilles or Nicaragua or Niger or Nigeria or Pakistan or Palestine or Papua New Guinea or Paraguay or Philippines or Philipines or Phillipines or Phillippines or Rwanda or Ruanda or Samoa or Samoan Islands or Navigator Island or Navigator Islands or Sao Tome or Senegal or Sierra Leone or Sri Lanka or Ceylon or Solomon Islands or Somalia or Sudan or Swaziland or Syria or Principe or South Sudan or Tajikistan or Tadjhikistan or Tadjikistan or Tadjhik or Tanzania or Timor-Leste or Togo or Togolese Republic or Uganda or Ukraine or Uzbekistan or Uzbek or Vanuatu or New Hebrides or Vietnam or Viet Nam or West Bank or Yemen or Zambia or Zimbabwe or Rhodesia).hw,kf,ti,ab,cp. |
| 40 | ((developing or less* developed or under developed or underdeveloped or low* middle income or low* income or underserved or under served or deprived or poor*) adj (countr* or nation? or state? or population? or world)).ti,ab.                                                                                                                                                                                                                                                                                                                                                                                                                                                                                                                                                                                                                                                                                                                                                                                                                                                                                                                                                                                                                                                                                                                                                                                                                                                                                                                                                                                                                                                                                                                                                                                                                                                                                                 |
| 41 | ((developing or less* developed or under developed or underdeveloped or low* middle income or low* income) adj (economy or economies)).ti,ab.                                                                                                                                                                                                                                                                                                                                                                                                                                                                                                                                                                                                                                                                                                                                                                                                                                                                                                                                                                                                                                                                                                                                                                                                                                                                                                                                                                                                                                                                                                                                                                                                                                                                                                                                                                                     |
| 42 | (low* adj (gdp or gnp or gross domestic or gross national)).ti,ab.                                                                                                                                                                                                                                                                                                                                                                                                                                                                                                                                                                                                                                                                                                                                                                                                                                                                                                                                                                                                                                                                                                                                                                                                                                                                                                                                                                                                                                                                                                                                                                                                                                                                                                                                                                                                                                                                |
| 43 | (Imic or lami).ti,ab.                                                                                                                                                                                                                                                                                                                                                                                                                                                                                                                                                                                                                                                                                                                                                                                                                                                                                                                                                                                                                                                                                                                                                                                                                                                                                                                                                                                                                                                                                                                                                                                                                                                                                                                                                                                                                                                                                                             |
| 44 | transitional countr*.ti,ab.                                                                                                                                                                                                                                                                                                                                                                                                                                                                                                                                                                                                                                                                                                                                                                                                                                                                                                                                                                                                                                                                                                                                                                                                                                                                                                                                                                                                                                                                                                                                                                                                                                                                                                                                                                                                                                                                                                       |
| 45 | 38 or 39 or 40 or 41 or 42 or 43 or 44                                                                                                                                                                                                                                                                                                                                                                                                                                                                                                                                                                                                                                                                                                                                                                                                                                                                                                                                                                                                                                                                                                                                                                                                                                                                                                                                                                                                                                                                                                                                                                                                                                                                                                                                                                                                                                                                                            |
| 46 | drinking behavior/                                                                                                                                                                                                                                                                                                                                                                                                                                                                                                                                                                                                                                                                                                                                                                                                                                                                                                                                                                                                                                                                                                                                                                                                                                                                                                                                                                                                                                                                                                                                                                                                                                                                                                                                                                                                                                                                                                                |
| 47 | alcohol consumption/                                                                                                                                                                                                                                                                                                                                                                                                                                                                                                                                                                                                                                                                                                                                                                                                                                                                                                                                                                                                                                                                                                                                                                                                                                                                                                                                                                                                                                                                                                                                                                                                                                                                                                                                                                                                                                                                                                              |
| 48 | exp alcoholic beverage/                                                                                                                                                                                                                                                                                                                                                                                                                                                                                                                                                                                                                                                                                                                                                                                                                                                                                                                                                                                                                                                                                                                                                                                                                                                                                                                                                                                                                                                                                                                                                                                                                                                                                                                                                                                                                                                                                                           |
| 49 | (alcohol* adj5 (drink* or factor* or pattern* or habit* or consum* or unhealthy)).ti,ab.                                                                                                                                                                                                                                                                                                                                                                                                                                                                                                                                                                                                                                                                                                                                                                                                                                                                                                                                                                                                                                                                                                                                                                                                                                                                                                                                                                                                                                                                                                                                                                                                                                                                                                                                                                                                                                          |
| 50 | (drink* adj5 (factor* or pattern* or habit* or consum* or unhealthy or bing*)).ti,ab.                                                                                                                                                                                                                                                                                                                                                                                                                                                                                                                                                                                                                                                                                                                                                                                                                                                                                                                                                                                                                                                                                                                                                                                                                                                                                                                                                                                                                                                                                                                                                                                                                                                                                                                                                                                                                                             |
| 51 | (alcohol* or drink*).ti.                                                                                                                                                                                                                                                                                                                                                                                                                                                                                                                                                                                                                                                                                                                                                                                                                                                                                                                                                                                                                                                                                                                                                                                                                                                                                                                                                                                                                                                                                                                                                                                                                                                                                                                                                                                                                                                                                                          |
| 52 | exp smoking/ or "tobacco use"/                                                                                                                                                                                                                                                                                                                                                                                                                                                                                                                                                                                                                                                                                                                                                                                                                                                                                                                                                                                                                                                                                                                                                                                                                                                                                                                                                                                                                                                                                                                                                                                                                                                                                                                                                                                                                                                                                                    |
| 53 | (tobacco or smoking or smoke or smoker?).ti,ab.                                                                                                                                                                                                                                                                                                                                                                                                                                                                                                                                                                                                                                                                                                                                                                                                                                                                                                                                                                                                                                                                                                                                                                                                                                                                                                                                                                                                                                                                                                                                                                                                                                                                                                                                                                                                                                                                                   |
| 54 | feeding behavior/ or eating habit/ or food preference/ or portion size/                                                                                                                                                                                                                                                                                                                                                                                                                                                                                                                                                                                                                                                                                                                                                                                                                                                                                                                                                                                                                                                                                                                                                                                                                                                                                                                                                                                                                                                                                                                                                                                                                                                                                                                                                                                                                                                           |
| 55 | *diet/                                                                                                                                                                                                                                                                                                                                                                                                                                                                                                                                                                                                                                                                                                                                                                                                                                                                                                                                                                                                                                                                                                                                                                                                                                                                                                                                                                                                                                                                                                                                                                                                                                                                                                                                                                                                                                                                                                                            |
| 56 | exp obesity/                                                                                                                                                                                                                                                                                                                                                                                                                                                                                                                                                                                                                                                                                                                                                                                                                                                                                                                                                                                                                                                                                                                                                                                                                                                                                                                                                                                                                                                                                                                                                                                                                                                                                                                                                                                                                                                                                                                      |
| 57 | *food/ or fast food/ or fat/ or exp fruit/ or *vegetable/                                                                                                                                                                                                                                                                                                                                                                                                                                                                                                                                                                                                                                                                                                                                                                                                                                                                                                                                                                                                                                                                                                                                                                                                                                                                                                                                                                                                                                                                                                                                                                                                                                                                                                                                                                                                                                                                         |
| 58 | carbonated beverage/ or energy drink/ or soft drink/ or sports drink/                                                                                                                                                                                                                                                                                                                                                                                                                                                                                                                                                                                                                                                                                                                                                                                                                                                                                                                                                                                                                                                                                                                                                                                                                                                                                                                                                                                                                                                                                                                                                                                                                                                                                                                                                                                                                                                             |



|    |                                                                                                                                                                      |
|----|----------------------------------------------------------------------------------------------------------------------------------------------------------------------|
| 59 | ((food or eating or diet*) adj5 (factor* or pattern* or habit* or consum* or unhealthy or healthy or healthful)).ti,ab.                                              |
| 60 | ((high* or low*) adj2 (fat? or salt? or sugar or carbohydrate?)).ti,ab.                                                                                              |
| 61 | ((fat? or salt? or sodium or sugar? or carbohydrate?) adj5 (factor? or pattern? or habit? or consum* or eat? or eating)).ti,ab.                                      |
| 62 | ((carbonated or sugar* or fizzy) adj2 (drink* or beverage?)).ti,ab.                                                                                                  |
| 63 | ((unhealthy or healthy or healthful) adj3 (fat? or oil?)) or transfat? or trans fat?).ti,ab.                                                                         |
| 64 | ((fruit? or vegetable? or fibre or fiber) adj5 (factor? or pattern? or habit? or consum* or eat? or eating)).ti,ab.                                                  |
| 65 | (junk food? or junkfood? or fast food? or fastfood? or snack*).ti,ab.                                                                                                |
| 66 | exp physical activity/                                                                                                                                               |
| 67 | exp *exercise/                                                                                                                                                       |
| 68 | physical inactivity/                                                                                                                                                 |
| 69 | *lifestyle/ or sedentary lifestyle/                                                                                                                                  |
| 70 | (physical* adj3 (fit* or activ* or inactiv*)).ti,ab.                                                                                                                 |
| 71 | inactivity.ti,ab.                                                                                                                                                    |
| 72 | (sedentary adj3 (lifestyle* or life style* or behavio*)).ti,ab.                                                                                                      |
| 73 | exercise*.ti.                                                                                                                                                        |
| 74 | 46 or 47 or 48 or 49 or 50 or 51 or 52 or 53 or 54 or 55 or 56 or 57 or 58 or 59 or 60 or 61 or 62 or 63 or 64 or 65 or 66 or 67 or 68 or 69 or 70 or 71 or 72 or 73 |
| 75 | 25 and 37 and 45 and 74                                                                                                                                              |

## Piloted Screening Form

|                                                                     | <b>Criteria</b>                                                                                                                        | <b>Tick if yes</b>       |
|---------------------------------------------------------------------|----------------------------------------------------------------------------------------------------------------------------------------|--------------------------|
| 1                                                                   | Study is based in a World Bank listed Low- or Lower-Middle Income Country                                                              | <input type="checkbox"/> |
| 2                                                                   | At least one indicator of poverty                                                                                                      | <input type="checkbox"/> |
| 3                                                                   | Data on one or more NCD behavioral risk factor (tobacco use, unhealthy diet, harmful alcohol use, physical inactivity)                 | <input type="checkbox"/> |
| 4                                                                   | Primary research study (not a narrative review, editorial, book, opinion piece, letter, report, poster presentation or abstracts only) | <input type="checkbox"/> |
| <b>IF YES to all above criteria, include study for full review:</b> |                                                                                                                                        | <b>YES or NO</b>         |

## Quality Scoring Rubric

| Study type                     | 1                                                                        | 2                                                                      | 3                                                                                    | 4                                                                        | 5                                                                               | 6                                                         | 7                                                | 8                                | Total score<br>1=achieved,<br>0=not achieved,<br>2=unclear [RCT] |
|--------------------------------|--------------------------------------------------------------------------|------------------------------------------------------------------------|--------------------------------------------------------------------------------------|--------------------------------------------------------------------------|---------------------------------------------------------------------------------|-----------------------------------------------------------|--------------------------------------------------|----------------------------------|------------------------------------------------------------------|
| <b>Case-Control</b>            | Is Case Definition Adequate?                                             | Representativeness of the Cases                                        | Selection of Controls                                                                | Definition of Controls                                                   | Comparability of cases and controls on basis of design/analysis                 | Ascertainment of Exposure                                 | Non-Response Rate                                |                                  |                                                                  |
| <b>Cohort</b>                  | Representativeness of the exposed cohort                                 | Selection of the non-exposed cohort                                    | Ascertainment of exposure                                                            | Demonstration that outcome of interest was not present at start of study | Comparability of cohorts on the basis of the design or analysis                 | Assessment of outcome                                     | Was follow-up long enough for outcomes to occur  | Adequacy of follow-up of cohorts |                                                                  |
| <b>Cross-sectional</b>         | Representativeness of the sample                                         | Sample Size                                                            | Non-respondents                                                                      | Ascertainment of the exposure                                            | Comparability of subjects in different outcome groups (control for confounding) | Assessment of the outcome                                 | Statistical test is appropriate                  |                                  |                                                                  |
| <b>Interrupted time series</b> | shape of intervention prespecified (they say what they expect to happen) | Intervention independent of other changes/confounders/historic changes | Intervention did not affect data collection/data collection method same pre and post | Allocation concealment (blind or objective outcome assessment)           | Incomplete data adequately addressed                                            | all outcomes mentioned in methods are reported in results | free from other sources of bias e.g. seasonality |                                  |                                                                  |
| <b>RCT</b>                     | Random sequence generation (selection bias)                              | Allocation concealment (selection bias)                                | Blinding of participants and personell (performance bias)                            | Blinding of outcome assessment (detection bias)                          | Incomplete outcome data (reporting bias)                                        | Selective reporting (reporting bias)                      | Other bias                                       |                                  |                                                                  |

score 1=achieved, 0=not achieved, 2=unclear [RCT only]

| Section/topic                      | #  | Checklist item                                                                                                                                                                                                                                                                                              | Reported on page # |
|------------------------------------|----|-------------------------------------------------------------------------------------------------------------------------------------------------------------------------------------------------------------------------------------------------------------------------------------------------------------|--------------------|
| <b>TITLE</b>                       |    |                                                                                                                                                                                                                                                                                                             |                    |
| Title                              | 1  | Identify the report as a systematic review, meta-analysis, or both.                                                                                                                                                                                                                                         | 1                  |
| <b>ABSTRACT</b>                    |    |                                                                                                                                                                                                                                                                                                             |                    |
| Structured summary                 | 2  | Provide a structured summary including, as applicable: background; objectives; data sources; study eligibility criteria, participants, and interventions; study appraisal and synthesis methods; results; limitations; conclusions and implications of key findings; systematic review registration number. | 2                  |
| <b>INTRODUCTION</b>                |    |                                                                                                                                                                                                                                                                                                             |                    |
| Rationale                          | 3  | Describe the rationale for the review in the context of what is already known.                                                                                                                                                                                                                              | 3                  |
| Objectives                         | 4  | Provide an explicit statement of questions being addressed with reference to participants, interventions, comparisons, outcomes, and study design (PICOS).                                                                                                                                                  | 4                  |
| <b>METHODS</b>                     |    |                                                                                                                                                                                                                                                                                                             |                    |
| Protocol and registration          | 5  | Indicate if a review protocol exists, if and where it can be accessed (e.g., Web address), and, if available, provide registration information including registration number.                                                                                                                               | 4                  |
| Eligibility criteria               | 6  | Specify study characteristics (e.g., PICOS, length of follow-up) and report characteristics (e.g., years considered, language, publication status) used as criteria for eligibility, giving rationale.                                                                                                      | 4                  |
| Information sources                | 7  | Describe all information sources (e.g., databases with dates of coverage, contact with study authors to identify additional studies) in the search and date last searched.                                                                                                                                  | 4                  |
| Search                             | 8  | Present full electronic search strategy for at least one database, including any limits used, such that it could be repeated.                                                                                                                                                                               | Box 1              |
| Study selection                    | 9  | State the process for selecting studies (i.e., screening, eligibility, included in systematic review, and, if applicable, included in the meta-analysis).                                                                                                                                                   | 5                  |
| Data collection process            | 10 | Describe method of data extraction from reports (e.g., piloted forms, independently, in duplicate) and any processes for obtaining and confirming data from investigators.                                                                                                                                  | 5                  |
| Data items                         | 11 | List and define all variables for which data were sought (e.g., PICOS, funding sources) and any assumptions and simplifications made.                                                                                                                                                                       | 5, Apdx 3          |
| Risk of bias in individual studies | 12 | Describe methods used for assessing risk of bias of individual studies (including specification of whether this was done at the study or outcome level), and how this information is to be used in any data synthesis.                                                                                      | 5                  |
| Summary measures                   | 13 | State the principal summary measures (e.g., risk ratio, difference in means).                                                                                                                                                                                                                               | 5                  |
| Synthesis of results               | 14 | Describe the methods of handling data and combining results of studies, if done, including measures of consistency (e.g., $I^2$ ) for each meta-analysis.                                                                                                                                                   | 5                  |

| Section/topic                 | #  | Checklist item                                                                                                                                                                                           | Reported on page #     |
|-------------------------------|----|----------------------------------------------------------------------------------------------------------------------------------------------------------------------------------------------------------|------------------------|
| Risk of bias across studies   | 15 | Specify any assessment of risk of bias that may affect the cumulative evidence (e.g., publication bias, selective reporting within studies).                                                             | 5                      |
| Additional analyses           | 16 | Describe methods of additional analyses (e.g., sensitivity or subgroup analyses, meta-regression), if done, indicating which were pre-specified.                                                         | 5                      |
| <b>RESULTS</b>                |    |                                                                                                                                                                                                          |                        |
| Study selection               | 17 | Give numbers of studies screened, assessed for eligibility, and included in the review, with reasons for exclusions at each stage, ideally with a flow diagram.                                          | 6                      |
| Study characteristics         | 18 | For each study, present characteristics for which data were extracted (e.g., study size, PICOS, follow-up period) and provide the citations.                                                             | Tables 1-5, References |
| Risk of bias within studies   | 19 | Present data on risk of bias of each study and, if available, any outcome level assessment (see item 12).                                                                                                | Tables 1-5             |
| Results of individual studies | 20 | For all outcomes considered (benefits or harms), present, for each study: (a) simple summary data for each intervention group (b) effect estimates and confidence intervals, ideally with a forest plot. | Tables 1-5             |
| Synthesis of results          | 21 | Present results of each meta-analysis done, including confidence intervals and measures of consistency.                                                                                                  | n/a                    |
| Risk of bias across studies   | 22 | Present results of any assessment of risk of bias across studies (see Item 15).                                                                                                                          | n/a                    |
| Additional analysis           | 23 | Give results of additional analyses, if done (e.g., sensitivity or subgroup analyses, meta-regression [see Item 16]).                                                                                    | 7-11                   |
| <b>DISCUSSION</b>             |    |                                                                                                                                                                                                          |                        |
| Summary of evidence           | 24 | Summarize the main findings including the strength of evidence for each main outcome; consider their relevance to key groups (e.g., healthcare providers, users, and policy makers).                     | 11-12                  |
| Limitations                   | 25 | Discuss limitations at study and outcome level (e.g., risk of bias), and at review-level (e.g., incomplete retrieval of identified research, reporting bias).                                            | 13                     |
| Conclusions                   | 26 | Provide a general interpretation of the results in the context of other evidence, and implications for future research.                                                                                  | 11-12, 14              |
| <b>FUNDING</b>                |    |                                                                                                                                                                                                          |                        |
| Funding                       | 27 | Describe sources of funding for the systematic review and other support (e.g., supply of data); role of funders for the systematic review.                                                               | 1                      |

From: Moher D, Liberati A, Tetzlaff J, Altman DG, The PRISMA Group (2009). Preferred Reporting Items for Systematic Reviews and Meta-Analyses: The PRISMA Statement. PLoS Med 6(6): e1000097. doi:10.1371/journal.pmed1000097

For more information, visit: [www.prisma-statement.org](http://www.prisma-statement.org).

## Extracted data variables

- Authors
- Reference
- Year
- Country
- Sample description
- Study design
- Age mean
- Age range
- Sex
- Sample frame size
- N included
- N responders/n with complete follow up information
- Source of funding
- Exposures and definition
- Subgroups
- Outcomes and definition
- Crude and adjusted results
- P values
- 95% Cis
- Adjusted variables
